# Supplementary material
Source: publisher site journal article supplement (https://www.dovepress.com/article/442684)
Supplement: Supplementary file 1 [file get_supplementary_file.php]

# Supplementary Materials

## Catalogs

|                              |       |
|------------------------------|-------|
| cellMarkers .....            | 1-45  |
| net_lr .....                 | 46    |
| TableS1.....                 | 47-50 |
| GSEA-CD3D .....              | 51-54 |
| GSEA-IL2RG .....             | 55-58 |
| GSEA-MS4A6A .....            | 59-62 |
| GSEA-NCF2 .....              | 63-66 |
| GSVA-CD3D .....              | 67    |
| GSVA-IL2RG .....             | 68    |
| GSVA-MS4A6A .....            | 69    |
| GSVA-NCF2 .....              | 70    |
| RT-qPCR data .....           | 71    |
| code1 .....                  | 72-76 |
| Ethical review reports ..... | 77-78 |
| Supplementary Methods.....   | 79-80 |

# cellMarkers

| p_val | avg_log2FC   | pct.1 | pct.2 | p_val_adj | cluster   | gene     |
|-------|--------------|-------|-------|-----------|-----------|----------|
| 0     | 3.079067309  | 0.897 | 0.09  |           | 0 T_cells | TRAC     |
| 0     | 2.623456359  | 0.71  | 0.057 |           | 0 T_cells | IL7R     |
| 0     | 2.617683185  | 0.853 | 0.077 |           | 0 T_cells | CD3D     |
| 0     | 2.131551009  | 0.873 | 0.186 |           | 0 T_cells | IL32     |
| 0     | 2.113411828  | 0.768 | 0.074 |           | 0 T_cells | CD3E     |
| 0     | 1.847413667  | 0.612 | 0.045 |           | 0 T_cells | CD3G     |
| 0     | 1.828759562  | 0.867 | 0.394 |           | 0 T_cells | LDHB     |
| 0     | 1.630278741  | 0.691 | 0.231 |           | 0 T_cells | TRBC2    |
| 0     | 1.450797292  | 0.486 | 0.06  |           | 0 T_cells | CD27     |
| 0     | 1.413928212  | 0.545 | 0.187 |           | 0 T_cells | TRBC1    |
| 0     | 1.378016079  | 0.631 | 0.236 |           | 0 T_cells | NOSIP    |
| 0     | 1.261702302  | 0.458 | 0.079 |           | 0 T_cells | TCF7     |
| 0     | 1.255506679  | 0.49  | 0.121 |           | 0 T_cells | CCR7     |
| 0     | 1.240098014  | 0.357 | 0.019 |           | 0 T_cells | TRAT1    |
| 0     | 1.235519722  | 0.599 | 0.138 |           | 0 T_cells | CD2      |
| 0     | 1.202344235  | 0.339 | 0.018 |           | 0 T_cells | LEF1     |
| 0     | 1.08994794   | 0.841 | 0.42  |           | 0 T_cells | LTB      |
| 0     | 1.059397317  | 0.811 | 0.412 |           | 0 T_cells | GIMAP7   |
| 0     | 1.032434453  | 0.288 | 0.016 |           | 0 T_cells | MAL      |
| 0     | 1.022504462  | 0.451 | 0.117 |           | 0 T_cells | PIK3IP1  |
| 0     | -1.019382003 | 0.51  | 0.661 |           | 0 T_cells | ITGB2    |
| 0     | -1.035119087 | 0.252 | 0.509 |           | 0 T_cells | AP2S1    |
| 0     | -1.044417558 | 0.016 | 0.262 |           | 0 T_cells | CD68     |
| 0     | -1.06397008  | 0.091 | 0.337 |           | 0 T_cells | FCGRT    |
| 0     | -1.068790747 | 0.188 | 0.446 |           | 0 T_cells | CTSD     |
| 0     | -1.072980252 | 0.145 | 0.4   |           | 0 T_cells | LTA4H    |
| 0     | -1.077640427 | 0.023 | 0.277 |           | 0 T_cells | FAM26F   |
| 0     | -1.092067495 | 0.049 | 0.308 |           | 0 T_cells | GCA      |
| 0     | -1.140647116 | 0.042 | 0.299 |           | 0 T_cells | NUP214   |
| 0     | -1.147158313 | 0.056 | 0.374 |           | 0 T_cells | FGR      |
| 0     | -1.154094132 | 0.918 | 0.962 |           | 0 T_cells | H3F3A    |
| 0     | -1.168509855 | 0.011 | 0.313 |           | 0 T_cells | LY86     |
| 0     | -1.183145025 | 0.216 | 0.45  |           | 0 T_cells | TKT      |
| 0     | -1.190370789 | 0.88  | 0.942 |           | 0 T_cells | OAZ1     |
| 0     | -1.20036413  | 0.007 | 0.272 |           | 0 T_cells | CSF3R    |
| 0     | -1.205193007 | 0.029 | 0.304 |           | 0 T_cells | TNFSF13B |
| 0     | -1.205458259 | 0.085 | 0.401 |           | 0 T_cells | APLP2    |
| 0     | -1.212642138 | 0.026 | 0.25  |           | 0 T_cells | RGS2     |
| 0     | -1.227893853 | 0.078 | 0.424 |           | 0 T_cells | ZEB2     |
| 0     | -1.236692553 | 0.214 | 0.452 |           | 0 T_cells | COTL1    |
| 0     | -1.238151345 | 0.055 | 0.349 |           | 0 T_cells | BLVRB    |
| 0     | -1.268930792 | 0.004 | 0.306 |           | 0 T_cells | MPEG1    |
| 0     | -1.294332662 | 0.004 | 0.265 |           | 0 T_cells | TMEM176B |
| 0     | -1.313634885 | 0.767 | 0.79  |           | 0 T_cells | S100A4   |
| 0     | -1.315586771 | 0.157 | 0.435 |           | 0 T_cells | NCF1     |
| 0     | -1.323771251 | 0.004 | 0.299 |           | 0 T_cells | CLEC12A  |
| 0     | -1.327931184 | 0.195 | 0.51  |           | 0 T_cells | PYCARD   |
| 0     | -1.330584157 | 0.038 | 0.33  |           | 0 T_cells | CFP      |
| 0     | -1.34162957  | 0.052 | 0.335 |           | 0 T_cells | TYMP     |
| 0     | -1.354127801 | 0.006 | 0.309 |           | 0 T_cells | CLEC7A   |

|   |              |       |       |           |               |       |
|---|--------------|-------|-------|-----------|---------------|-------|
| 0 | -1.362748664 | 0.007 | 0.332 | 0 T_cells | SPI1          |       |
| 0 | -1.36461214  | 0.021 | 0.338 | 0 T_cells | RNASE6        |       |
| 0 | -1.386376484 | 0.009 | 0.297 | 0 T_cells | CD36          |       |
| 0 | -1.39729898  | 0.03  | 0.362 | 0 T_cells | HLA-DMB       |       |
| 0 | -1.398539514 | 0.006 | 0.25  | 0 T_cells | LGALS2        |       |
| 0 | -1.398894306 | 0.436 | 0.611 | 0 T_cells | TSPO          |       |
| 0 | -1.416677592 | 0.01  | 0.37  | 0 T_cells |               | 1-Mar |
| 0 | -1.421230143 | 0.007 | 0.297 | 0 T_cells | DUSP6         |       |
| 0 | -1.428615862 | 0.101 | 0.272 | 0 T_cells | IGKC          |       |
| 0 | -1.451526514 | 0.013 | 0.361 | 0 T_cells | MEF2C         |       |
| 0 | -1.465303063 | 0.12  | 0.416 | 0 T_cells | STXBP2        |       |
| 0 | -1.475444308 | 0.019 | 0.349 | 0 T_cells | FGL2          |       |
| 0 | -1.484017324 | 0.082 | 0.296 | 0 T_cells | FCGR3A        |       |
| 0 | -1.553958486 | 0.789 | 0.952 | 0 T_cells | CYBA          |       |
| 0 | -1.554688591 | 0.008 | 0.368 | 0 T_cells | CYBB          |       |
| 0 | -1.566551555 | 0.554 | 0.747 | 0 T_cells | SRGN          |       |
| 0 | -1.573274927 | 0.492 | 0.623 | 0 T_cells | S100A11       |       |
| 0 | -1.590346266 | 0.063 | 0.443 | 0 T_cells | HLA-DMA       |       |
| 0 | -1.600086958 | 0.006 | 0.327 | 0 T_cells | SERPINA1      |       |
| 0 | -1.620906377 | 0.205 | 0.535 | 0 T_cells | NPC2          |       |
| 0 | -1.675251445 | 0.068 | 0.433 | 0 T_cells | GRN           |       |
| 0 | -1.704761348 | 0.342 | 0.692 | 0 T_cells | GSTP1         |       |
| 0 | -1.714410846 | 0.868 | 0.794 | 0 T_cells | S100A6        |       |
| 0 | -1.76100724  | 0.211 | 0.53  | 0 T_cells | AP1S2         |       |
| 0 | -1.770955888 | 0.48  | 0.678 | 0 T_cells | NEAT1         |       |
| 0 | -1.772496909 | 0.079 | 0.299 | 0 T_cells | CD79B         |       |
| 0 | -1.772979818 | 0.016 | 0.277 | 0 T_cells | FOS           |       |
| 0 | -1.78730225  | 0.011 | 0.348 | 0 T_cells | MS4A6A        |       |
| 0 | -1.793578796 | 0.969 | 0.982 | 0 T_cells | FTH1          |       |
| 0 | -1.795054009 | 0.023 | 0.302 | 0 T_cells | HLA-DQA1      |       |
| 0 | -1.957052047 | 0.305 | 0.62  | 0 T_cells | SAT1          |       |
| 0 | -1.97181427  | 0.065 | 0.44  | 0 T_cells | HLA-DQB1      |       |
| 0 | -1.986460061 | 0.245 | 0.604 | 0 T_cells | PSAP          |       |
| 0 | -2.047034045 | 0.044 | 0.4   | 0 T_cells | CFD           |       |
| 0 | -2.152228635 | 0.285 | 0.638 | 0 T_cells | HLA-DPB1      |       |
| 0 | -2.168419133 | 0.053 | 0.484 | 0 T_cells | HLA-DRB5      |       |
| 0 | -2.207137046 | 0.272 | 0.633 | 0 T_cells | LGALS1        |       |
| 0 | -2.247081454 | 0.013 | 0.372 | 0 T_cells | CD14          |       |
| 0 | -2.319850745 | 0.206 | 0.598 | 0 T_cells | HLA-DPA1      |       |
| 0 | -2.381151156 | 0.011 | 0.421 | 0 T_cells | CSTA          |       |
| 0 | -2.387030432 | 0.974 | 0.987 | 0 T_cells | FTL           |       |
| 0 | -2.448887302 | 0.009 | 0.379 | 0 T_cells | VCAN          |       |
| 0 | -2.478955335 | 0.266 | 0.667 | 0 T_cells | CTSS          |       |
| 0 | -2.485751782 | 0.057 | 0.338 | 0 T_cells | RP11-1143G9.4 |       |
| 0 | -2.503597412 | 0.299 | 0.638 | 0 T_cells | GPX1          |       |
| 0 | -2.514639707 | 0.203 | 0.478 | 0 T_cells | AIF1          |       |
| 0 | -2.632555856 | 0.016 | 0.453 | 0 T_cells | MNDA          |       |
| 0 | -2.809815767 | 0.15  | 0.662 | 0 T_cells | HLA-DRB1      |       |
| 0 | -2.931631297 | 0.102 | 0.501 | 0 T_cells | LST1          |       |
| 0 | -3.024674641 | 0.024 | 0.451 | 0 T_cells | FCN1          |       |
| 0 | -3.123030601 | 0.016 | 0.38  | 0 T_cells | S100A12       |       |

|           |              |       |       |           |         |          |
|-----------|--------------|-------|-------|-----------|---------|----------|
| 0         | -3.273055579 | 0.479 | 0.813 | 0         | T_cells | CD74     |
| 0         | -3.370568931 | 0.07  | 0.711 | 0         | T_cells | FCER1G   |
| 0         | -3.74399962  | 0.111 | 0.736 | 0         | T_cells | TYROBP   |
| 0         | -3.88734955  | 0.068 | 0.523 | 0         | T_cells | CST3     |
| 0         | -4.040480407 | 0.121 | 0.705 | 0         | T_cells | HLA-DRA  |
| 0         | -5.141201312 | 0.147 | 0.528 | 0         | T_cells | LYZ      |
| 0         | -5.331289928 | 0.18  | 0.519 | 0         | T_cells | S100A8   |
| 0         | -5.674906445 | 0.231 | 0.567 | 0         | T_cells | S100A9   |
| 8.33E-270 | -1.240363744 | 0.283 | 0.467 | 2.81E-265 | T_cells | MTRNR2L1 |
| 8.05E-240 | -1.569820158 | 0.136 | 0.285 | 2.71E-235 | T_cells | GZMB     |
| 1.63E-157 | -1.247502478 | 0.133 | 0.251 | 5.48E-153 | T_cells | FGFBP2   |
| 1.02E-127 | -1.517922814 | 0.219 | 0.328 | 3.43E-123 | T_cells | GNLY     |
| 6.90E-82  | -1.244515535 | 0.203 | 0.273 | 2.33E-77  | T_cells | PRF1     |
| 8.03E-49  | -1.031756263 | 0.302 | 0.35  | 2.71E-44  | T_cells | NKG7     |
| 0         | 3.857739078  | 0.965 | 0.182 | 0         | NK_cell | GNLY     |
| 0         | 3.363872099  | 1     | 0.243 | 0         | NK_cell | NKG7     |
| 0         | 3.352269795  | 0.95  | 0.109 | 0         | NK_cell | GZMB     |
| 0         | 3.266494435  | 0.889 | 0.099 | 0         | NK_cell | FGFBP2   |
| 0         | 3.262673751  | 0.962 | 0.146 | 0         | NK_cell | PRF1     |
| 0         | 3.223958547  | 0.887 | 0.05  | 0         | NK_cell | KLRF1    |
| 0         | 3.134116599  | 0.786 | 0.051 | 0         | NK_cell | SPON2    |
| 0         | 3.029126038  | 0.595 | 0.027 | 0         | NK_cell | MYOM2    |
| 0         | 2.847550128  | 0.747 | 0.056 | 0         | NK_cell | CLIC3    |
| 0         | 2.801769719  | 0.968 | 0.184 | 0         | NK_cell | CST7     |
| 0         | 2.781913405  | 0.974 | 0.197 | 0         | NK_cell | GZMA     |
| 0         | 2.69692067   | 0.916 | 0.129 | 0         | NK_cell | KLRD1    |
| 0         | 2.539894244  | 0.951 | 0.273 | 0         | NK_cell | CTSW     |
| 0         | 2.530274027  | 0.941 | 0.192 | 0         | NK_cell | KLRB1    |
| 0         | 2.515691959  | 0.811 | 0.144 | 0         | NK_cell | HOPX     |
| 0         | 2.500203491  | 0.74  | 0.097 | 0         | NK_cell | CCL4     |
| 0         | 2.482345642  | 0.823 | 0.093 | 0         | NK_cell | FCGR3A   |
| 0         | 2.295488815  | 0.857 | 0.268 | 0         | NK_cell | CD247    |
| 0         | 2.211606425  | 0.668 | 0.05  | 0         | NK_cell | TRDC     |
| 0         | 2.093495769  | 0.916 | 0.42  | 0         | NK_cell | CD7      |
| 0         | 2.012003853  | 0.625 | 0.138 | 0         | NK_cell | CMC1     |
| 0         | 1.950000965  | 0.801 | 0.305 | 0         | NK_cell | ID2      |
| 0         | 1.945384211  | 0.728 | 0.125 | 0         | NK_cell | GZMH     |
| 0         | 1.874942174  | 0.504 | 0.053 | 0         | NK_cell | IL2RB    |
| 0         | 1.854275317  | 0.589 | 0.092 | 0         | NK_cell | MATK     |
| 0         | 1.821061388  | 0.749 | 0.245 | 0         | NK_cell | GZMM     |
| 0         | 1.784584093  | 0.804 | 0.289 | 0         | NK_cell | CCL5     |
| 0         | 1.711310982  | 0.91  | 0.532 | 0         | NK_cell | ITGB2    |
| 0         | 1.704227435  | 0.873 | 0.472 | 0         | NK_cell | PLAC8    |
| 0         | 1.65098118   | 0.602 | 0.172 | 0         | NK_cell | CHST12   |
| 0         | 1.646470257  | 0.942 | 0.638 | 0         | NK_cell | IFITM2   |
| 0         | 1.627409564  | 0.357 | 0.025 | 0         | NK_cell | IGFBP7   |
| 0         | 1.617818531  | 0.373 | 0.031 | 0         | NK_cell | CD160    |
| 0         | 1.616138511  | 0.508 | 0.116 | 0         | NK_cell | APMAP    |
| 0         | 1.581814743  | 0.711 | 0.315 | 0         | NK_cell | CD63     |
| 0         | 1.566160382  | 0.527 | 0.123 | 0         | NK_cell | RHOC     |
| 0         | 1.563628266  | 0.384 | 0.034 | 0         | NK_cell | TTC38    |

|   |              |       |       |           |          |
|---|--------------|-------|-------|-----------|----------|
| 0 | 1.556630565  | 0.348 | 0.012 | 0 NK_cell | AKR1C3   |
| 0 | 1.54626069   | 0.757 | 0.34  | 0 NK_cell | MYO1F    |
| 0 | 1.507888241  | 0.387 | 0.035 | 0 NK_cell | PRSS23   |
| 0 | 1.503813003  | 0.469 | 0.144 | 0 NK_cell | DDIT4    |
| 0 | 1.489176862  | 0.361 | 0.033 | 0 NK_cell | ADGRG1   |
| 0 | 1.471086493  | 0.683 | 0.366 | 0 NK_cell | JAK1     |
| 0 | 1.468769021  | 0.478 | 0.139 | 0 NK_cell | ABHD17A  |
| 0 | 1.459274933  | 0.948 | 0.68  | 0 NK_cell | HCST     |
| 0 | 1.459198962  | 0.399 | 0.045 | 0 NK_cell | S1PR5    |
| 0 | 1.458671071  | 0.901 | 0.261 | 0 NK_cell | FCER1G   |
| 0 | 1.432406895  | 0.426 | 0.082 | 0 NK_cell | NCR3     |
| 0 | 1.430789394  | 0.417 | 0.083 | 0 NK_cell | CX3CR1   |
| 0 | 1.354746798  | 0.468 | 0.145 | 0 NK_cell | EFHD2    |
| 0 | 1.354308445  | 0.278 | 0.027 | 0 NK_cell | XCL2     |
| 0 | 1.353202256  | 0.331 | 0.032 | 0 NK_cell | PTGDR    |
| 0 | 1.335120461  | 0.513 | 0.174 | 0 NK_cell | PLEK     |
| 0 | 1.32334494   | 0.514 | 0.183 | 0 NK_cell | APOBEC3G |
| 0 | 1.308195719  | 0.41  | 0.113 | 0 NK_cell | ABI3     |
| 0 | 1.299054121  | 0.38  | 0.087 | 0 NK_cell | CD300A   |
| 0 | 1.279945729  | 0.334 | 0.042 | 0 NK_cell | FCRL6    |
| 0 | 1.274335592  | 0.382 | 0.099 | 0 NK_cell | PYHIN1   |
| 0 | 1.266750108  | 0.776 | 0.472 | 0 NK_cell | RARRES3  |
| 0 | 1.26466505   | 0.723 | 0.435 | 0 NK_cell | BIN2     |
| 0 | 1.263715992  | 0.998 | 0.929 | 0 NK_cell | PFN1     |
| 0 | 1.255507475  | 0.597 | 0.3   | 0 NK_cell | ALOX5AP  |
| 0 | 1.232415818  | 0.565 | 0.288 | 0 NK_cell | XBP1     |
| 0 | 1.214587277  | 0.556 | 0.254 | 0 NK_cell | CTSC     |
| 0 | 1.21295356   | 0.261 | 0.008 | 0 NK_cell | SH2D1B   |
| 0 | 1.208608584  | 0.937 | 0.596 | 0 NK_cell | SRGN     |
| 0 | 1.206681901  | 0.813 | 0.582 | 0 NK_cell | RAC2     |
| 0 | 1.205777725  | 0.52  | 0.242 | 0 NK_cell | DOK2     |
| 0 | 1.202163625  | 0.312 | 0.06  | 0 NK_cell | CEP78    |
| 0 | 1.182736304  | 0.293 | 0.031 | 0 NK_cell | C1orf21  |
| 0 | 1.161624033  | 0.588 | 0.326 | 0 NK_cell | OSTF1    |
| 0 | 1.15866459   | 0.675 | 0.42  | 0 NK_cell | LITAF    |
| 0 | 1.150328584  | 0.381 | 0.131 | 0 NK_cell | TXK      |
| 0 | 1.144419247  | 0.835 | 0.539 | 0 NK_cell | CLIC1    |
| 0 | 1.142919654  | 0.405 | 0.136 | 0 NK_cell | TPST2    |
| 0 | 1.126725226  | 0.469 | 0.164 | 0 NK_cell | C12orf75 |
| 0 | 1.119785714  | 0.294 | 0.052 | 0 NK_cell | PLEKHF1  |
| 0 | 1.112681429  | 0.69  | 0.417 | 0 NK_cell | CD99     |
| 0 | 1.106335586  | 0.95  | 0.817 | 0 NK_cell | UBB      |
| 0 | 1.092401728  | 0.668 | 0.43  | 0 NK_cell | DBI      |
| 0 | 1.087386414  | 1     | 0.96  | 0 NK_cell | HLA-C    |
| 0 | 1.023254498  | 0.286 | 0.068 | 0 NK_cell | GNPTAB   |
| 0 | 1.022654995  | 0.931 | 0.797 | 0 NK_cell | ARPC2    |
| 0 | 1.013241175  | 0.985 | 0.839 | 0 NK_cell | CYBA     |
| 0 | 1.01241524   | 0.999 | 0.963 | 0 NK_cell | HLA-A    |
| 0 | 1.009074541  | 1     | 0.981 | 0 NK_cell | HLA-B    |
| 0 | -1.007882221 | 0.997 | 0.984 | 0 NK_cell | RPS6     |
| 0 | -1.025692677 | 0.997 | 0.989 | 0 NK_cell | RPL13    |

|           |              |       |       |           |         |          |
|-----------|--------------|-------|-------|-----------|---------|----------|
| 0         | -1.029479436 | 0.995 | 0.985 | 0         | NK_cell | RPL11    |
| 0         | -1.029778067 | 0.528 | 0.855 | 0         | NK_cell | EIF3E    |
| 0         | -1.048801734 | 0.53  | 0.867 | 0         | NK_cell | RPL36A   |
| 0         | -1.050137859 | 0.943 | 0.977 | 0         | NK_cell | RPL36    |
| 0         | -1.060493686 | 0.997 | 0.984 | 0         | NK_cell | RPS18    |
| 0         | -1.075681798 | 0.977 | 0.981 | 0         | NK_cell | RPS13    |
| 0         | -1.095069888 | 0.983 | 0.98  | 0         | NK_cell | RPS25    |
| 0         | -1.098705633 | 0.993 | 0.983 | 0         | NK_cell | RPL18A   |
| 0         | -1.10502639  | 0.999 | 0.986 | 0         | NK_cell | RPL32    |
| 0         | -1.137514932 | 0.986 | 0.981 | 0         | NK_cell | RPS8     |
| 0         | -1.144648121 | 0.995 | 0.994 | 0         | NK_cell | RPS12    |
| 0         | -1.150647669 | 0.998 | 0.984 | 0         | NK_cell | RPL34    |
| 0         | -1.23463647  | 0.995 | 0.983 | 0         | NK_cell | RPL39    |
| 0         | -1.308207443 | 0.366 | 0.713 | 0         | NK_cell | LDHB     |
| 0         | -1.40015422  | 0.397 | 0.805 | 0         | NK_cell | VIM      |
| 0         | -1.895046572 | 0.071 | 0.596 | 0         | NK_cell | CD3D     |
| 0         | -2.1932106   | 0.04  | 0.495 | 0         | NK_cell | IL7R     |
| 0         | -2.514652839 | 0.09  | 0.629 | 0         | NK_cell | TRAC     |
| 0         | -2.817497762 | 0.17  | 0.73  | 0         | NK_cell | LTB      |
| 2.77E-305 | 1.129838378  | 0.349 | 0.111 | 9.33E-301 | NK_cell | RUNX3    |
| 6.22E-294 | -1.637093305 | 0.014 | 0.38  | 2.10E-289 | NK_cell | CCR7     |
| 3.48E-284 | 1.072201984  | 0.341 | 0.112 | 1.17E-279 | NK_cell | C5orf56  |
| 6.29E-283 | 1.04779055   | 0.611 | 0.369 | 2.12E-278 | NK_cell | CCND3    |
| 1.73E-282 | 1.125855067  | 0.441 | 0.188 | 5.84E-278 | NK_cell | ARPC5L   |
| 3.31E-278 | 1.129090462  | 0.423 | 0.174 | 1.12E-273 | NK_cell | GPR65    |
| 4.09E-277 | 1.134640627  | 0.504 | 0.256 | 1.38E-272 | NK_cell | DHRS7    |
| 1.94E-276 | 1.060590035  | 0.53  | 0.264 | 6.53E-272 | NK_cell | CTSD     |
| 8.90E-276 | 1.093169826  | 0.639 | 0.409 | 3.00E-271 | NK_cell | LY6E     |
| 2.80E-272 | 1.045725965  | 0.41  | 0.157 | 9.44E-268 | NK_cell | FGR      |
| 3.74E-271 | 1.152132177  | 0.472 | 0.223 | 1.26E-266 | NK_cell | SPN      |
| 3.01E-269 | 1.056419518  | 0.61  | 0.384 | 1.01E-264 | NK_cell | FAM49B   |
| 1.64E-258 | -1.177779784 | 0.059 | 0.422 | 5.54E-254 | NK_cell | CD3G     |
| 7.63E-256 | -1.122755984 | 0.146 | 0.529 | 2.57E-251 | NK_cell | CD3E     |
| 8.98E-255 | 1.047672092  | 0.393 | 0.16  | 3.03E-250 | NK_cell | PTPN4    |
| 8.61E-254 | -1.284884071 | 0.018 | 0.349 | 2.90E-249 | NK_cell | CD27     |
| 6.96E-248 | 1.070109854  | 0.533 | 0.302 | 2.34E-243 | NK_cell | PPP1R18  |
| 4.81E-243 | -2.367600896 | 0.026 | 0.346 | 1.62E-238 | NK_cell | AIF1     |
| 2.02E-236 | 1.010632332  | 0.36  | 0.141 | 6.80E-232 | NK_cell | ZAP70    |
| 4.20E-233 | -3.328667194 | 0.077 | 0.388 | 1.42E-228 | NK_cell | HLA-DRA  |
| 5.39E-219 | -2.285327986 | 0.084 | 0.387 | 1.82E-214 | NK_cell | HLA-DRB1 |
| 8.88E-219 | -1.370108491 | 0.035 | 0.341 | 2.99E-214 | NK_cell | COTL1    |
| 5.50E-218 | 1.028319184  | 0.523 | 0.309 | 1.85E-213 | NK_cell | CLEC2B   |
| 5.98E-208 | -1.006910155 | 0.113 | 0.454 | 2.02E-203 | NK_cell | RGS10    |
| 3.47E-203 | -1.230664978 | 0.033 | 0.324 | 1.17E-198 | NK_cell | BIRC3    |
| 9.14E-203 | 1.018703671  | 0.429 | 0.215 | 3.08E-198 | NK_cell | ARL4C    |
| 8.99E-199 | -1.252354946 | 0.019 | 0.298 | 3.03E-194 | NK_cell | NCF1     |
| 1.54E-149 | -2.08514345  | 0.055 | 0.286 | 5.19E-145 | NK_cell | LST1     |
| 2.10E-147 | -1.694545558 | 0.198 | 0.462 | 7.09E-143 | NK_cell | GPX1     |
| 1.52E-117 | -1.578427463 | 0.171 | 0.386 | 5.13E-113 | NK_cell | HLA-DPA1 |
| 8.47E-107 | -4.17145964  | 0.135 | 0.337 | 2.85E-102 | NK_cell | S100A8   |
| 1.51E-106 | -3.91361133  | 0.125 | 0.32  | 5.07E-102 | NK_cell | LYZ      |

|            |               |        |        |                   |                |
|------------|---------------|--------|--------|-------------------|----------------|
| 1. 55E-103 | -1. 049723613 | 0. 148 | 0. 361 | 5. 21E-99 NK_cell | AP1S2          |
| 4. 93E-98  | -4. 482402854 | 0. 19  | 0. 386 | 1. 66E-93 NK_cell | S100A9         |
| 6. 48E-90  | -1. 398603768 | 0. 261 | 0. 446 | 2. 18E-85 NK_cell | HLA-DPB1       |
| 1. 33E-83  | -2. 51909517  | 0. 112 | 0. 266 | 4. 47E-79 NK_cell | CST3           |
| 6. 69E-81  | -2. 21167007  | 0. 484 | 0. 628 | 2. 26E-76 NK_cell | CD74           |
| 5. 98E-65  | -1. 248002463 | 0. 281 | 0. 444 | 2. 02E-60 NK_cell | CTSS           |
| 1. 75E-42  | -1. 365388777 | 0. 964 | 0. 981 | 5. 90E-38 NK_cell | FTL            |
| 4. 12E-29  | -1. 016014115 | 0. 797 | 0. 843 | 1. 39E-24 NK_cell | S100A6         |
| 4. 14E-13  | -5. 217435497 | 0. 359 | 0. 319 | 1. 40E-08 NK_cell | HBB            |
| 0          | 6. 713406095  | 0. 971 | 0. 224 | 0 Monocyte        | S100A9         |
| 0          | 6. 365572191  | 0. 929 | 0. 172 | 0 Monocyte        | S100A8         |
| 0          | 6. 168967031  | 0. 971 | 0. 142 | 0 Monocyte        | LYZ            |
| 0          | 4. 795013762  | 0. 995 | 0. 076 | 0 Monocyte        | CST3           |
| 0          | 4. 104141635  | 0. 786 | 0. 016 | 0 Monocyte        | S100A12        |
| 0          | 4. 001545006  | 0. 928 | 0. 024 | 0 Monocyte        | FCN1           |
| 0          | 3. 903655474  | 0. 968 | 0. 096 | 0 Monocyte        | LST1           |
| 0          | 3. 656327249  | 0. 969 | 0. 159 | 0 Monocyte        | AIF1           |
| 0          | 3. 522159455  | 0. 903 | 0. 024 | 0 Monocyte        | MNDA           |
| 0          | 3. 404552126  | 0. 995 | 0. 213 | 0 Monocyte        | TYROBP         |
| 0          | 3. 387846973  | 0. 649 | 0. 057 | 0 Monocyte        | RP11-1143G9. 4 |
| 0          | 3. 370448915  | 0. 788 | 0. 01  | 0 Monocyte        | VCAN           |
| 0          | 3. 309349335  | 0. 88  | 0. 01  | 0 Monocyte        | CSTA           |
| 0          | 3. 183252252  | 0. 999 | 0. 975 | 0 Monocyte        | FTL            |
| 0          | 3. 151987432  | 0. 773 | 0. 012 | 0 Monocyte        | CD14           |
| 0          | 3. 123962386  | 0. 974 | 0. 298 | 0 Monocyte        | CTSS           |
| 0          | 2. 997696437  | 0. 977 | 0. 285 | 0 Monocyte        | LGALS1         |
| 0          | 2. 948947147  | 0. 818 | 0. 038 | 0 Monocyte        | CFD            |
| 0          | 2. 860770324  | 0. 967 | 0. 31  | 0 Monocyte        | GPX1           |
| 0          | 2. 760908252  | 0. 999 | 0. 8   | 0 Monocyte        | S100A6         |
| 0          | 2. 736513857  | 0. 976 | 0. 175 | 0 Monocyte        | FCER1G         |
| 0          | 2. 648967283  | 0. 939 | 0. 26  | 0 Monocyte        | PSAP           |
| 0          | 2. 631201783  | 0. 727 | 0. 01  | 0 Monocyte        | MS4A6A         |
| 0          | 2. 598462994  | 0. 566 | 0. 016 | 0 Monocyte        | FOS            |
| 0          | 2. 544670395  | 0. 98  | 0. 443 | 0 Monocyte        | S100A11        |
| 0          | 2. 522608604  | 0. 901 | 0. 207 | 0 Monocyte        | AP1S2          |
| 0          | 2. 479735772  | 0. 95  | 0. 467 | 0 Monocyte        | NEAT1          |
| 0          | 2. 479427877  | 0. 912 | 0. 319 | 0 Monocyte        | SAT1           |
| 0          | 2. 45735731   | 1      | 0. 968 | 0 Monocyte        | FTH1           |
| 0          | 2. 402817315  | 0. 686 | 0. 005 | 0 Monocyte        | SERPINA1       |
| 0          | 2. 370317227  | 0. 796 | 0. 078 | 0 Monocyte        | GRN            |
| 0          | 2. 257994875  | 0. 862 | 0. 215 | 0 Monocyte        | NPC2           |
| 0          | 2. 207245162  | 0. 702 | 0. 022 | 0 Monocyte        | FGL2           |
| 0          | 2. 202778108  | 0. 934 | 0. 405 | 0 Monocyte        | TSPO           |
| 0          | 2. 191864365  | 0. 995 | 0. 725 | 0 Monocyte        | S100A4         |
| 0          | 2. 17309762   | 0. 699 | 0. 024 | 0 Monocyte        | CYBB           |
| 0          | 2. 151358401  | 0. 521 | 0. 006 | 0 Monocyte        | LGALS2         |
| 0          | 2. 145121522  | 0. 606 | 0. 01  | 0 Monocyte        | DUSP6          |
| 0          | 2. 121568962  | 0. 686 | 0. 031 | 0 Monocyte        | CFP            |
| 0          | 2. 094458876  | 0. 723 | 0. 125 | 0 Monocyte        | STXBP2         |
| 0          | 2. 090647832  | 0. 643 | 0. 006 | 0 Monocyte        | CLEC7A         |
| 0          | 2. 073885261  | 0. 608 | 0. 011 | 0 Monocyte        | CD36           |

|   |             |       |       |            |           |
|---|-------------|-------|-------|------------|-----------|
| 0 | 2.053792015 | 0.813 | 0.191 | 0 Monocyte | COTL1     |
| 0 | 2.043466783 | 0.621 | 0.005 | 0 Monocyte | CLEC12A   |
| 0 | 2.025530716 | 0.637 | 0.055 | 0 Monocyte | TYMP      |
| 0 | 2.022664132 | 0.924 | 0.379 | 0 Monocyte | GSTP1     |
| 0 | 2.020375372 | 0.556 | 0.004 | 0 Monocyte | TMEM176B  |
| 0 | 1.917589993 | 0.621 | 0.027 | 0 Monocyte | TNFSF13B  |
| 0 | 1.909897918 | 0.616 | 0.025 | 0 Monocyte | SPI1      |
| 0 | 1.901355524 | 0.774 | 0.201 | 0 Monocyte | TKT       |
| 0 | 1.900857745 | 0.608 | 0.011 | 0 Monocyte | MPEG1     |
| 0 | 1.89535711  | 0.499 | 0.026 | 0 Monocyte | RGS2      |
| 0 | 1.89333861  | 0.564 | 0.007 | 0 Monocyte | CSF3R     |
| 0 | 1.861661355 | 0.823 | 0.204 | 0 Monocyte | PYCARD    |
| 0 | 1.83350161  | 0.642 | 0.128 | 0 Monocyte | HLA-DRB5  |
| 0 | 1.799739995 | 0.663 | 0.078 | 0 Monocyte | FCGRT     |
| 0 | 1.798494523 | 0.588 | 0.041 | 0 Monocyte | NUP214    |
| 0 | 1.752722081 | 0.634 | 0.065 | 0 Monocyte | BLVRB     |
| 0 | 1.741076583 | 0.421 | 0.013 | 0 Monocyte | MS4A7     |
| 0 | 1.711084941 | 0.502 | 0.004 | 0 Monocyte | CPVL      |
| 0 | 1.696080175 | 0.424 | 0.004 | 0 Monocyte | RBP7      |
| 0 | 1.686243812 | 0.859 | 0.237 | 0 Monocyte | HLA-DRB1  |
| 0 | 1.617510743 | 0.942 | 0.218 | 0 Monocyte | HLA-DRA   |
| 0 | 1.608501547 | 0.519 | 0.012 | 0 Monocyte | NCF2      |
| 0 | 1.607889644 | 0.52  | 0.02  | 0 Monocyte | CD68      |
| 0 | 1.604868713 | 0.544 | 0.055 | 0 Monocyte | RNASE6    |
| 0 | 1.597232193 | 0.974 | 0.551 | 0 Monocyte | SRGN      |
| 0 | 1.594860017 | 0.55  | 0.06  | 0 Monocyte | GCA       |
| 0 | 1.562211744 | 0.48  | 0.005 | 0 Monocyte | KCTD12    |
| 0 | 1.553572396 | 0.534 | 0.05  | 0 Monocyte | LY96      |
| 0 | 1.550074442 | 0.384 | 0.003 | 0 Monocyte | LINC01272 |
| 0 | 1.53868413  | 0.402 | 0.034 | 0 Monocyte | DUSP1     |
| 0 | 1.526407327 | 0.785 | 0.254 | 0 Monocyte | AP2S1     |
| 0 | 1.522209673 | 0.551 | 0.061 | 0 Monocyte | LGALS3    |
| 0 | 1.517833776 | 0.456 | 0.004 | 0 Monocyte | FPR1      |
| 0 | 1.506746003 | 0.554 | 0.039 | 0 Monocyte | RNF130    |
| 0 | 1.473487179 | 0.321 | 0.001 | 0 Monocyte | CYP11B1   |
| 0 | 1.464202842 | 0.601 | 0.112 | 0 Monocyte | JAML      |
| 0 | 1.459893611 | 0.414 | 0.003 | 0 Monocyte | MGST1     |
| 0 | 1.446270997 | 0.463 | 0.008 | 0 Monocyte | SLC7A7    |
| 0 | 1.445985043 | 0.622 | 0.159 | 0 Monocyte | LTA4H     |
| 0 | 1.443228247 | 0.617 | 0.117 | 0 Monocyte | APLP2     |
| 0 | 1.43513782  | 0.997 | 0.821 | 0 Monocyte | CYBA      |
| 0 | 1.426791468 | 0.606 | 0.19  | 0 Monocyte | NCF1      |
| 0 | 1.420659804 | 0.993 | 0.884 | 0 Monocyte | OAZ1      |
| 0 | 1.420470619 | 0.452 | 0.013 | 0 Monocyte | HCK       |
| 0 | 1.413812622 | 0.758 | 0.287 | 0 Monocyte | ANXA2     |
| 0 | 1.409945472 | 0.933 | 0.575 | 0 Monocyte | C14orf2   |
| 0 | 1.400909829 | 0.44  | 0.011 | 0 Monocyte | IGSF6     |
| 0 | 1.398914225 | 0.656 | 0.193 | 0 Monocyte | TIMP1     |
| 0 | 1.398305221 | 0.971 | 0.819 | 0 Monocyte | GAPDH     |
| 0 | 1.384896023 | 0.407 | 0.006 | 0 Monocyte | ASGR1     |
| 0 | 1.357514074 | 0.776 | 0.323 | 0 Monocyte | FKBP1A    |



|   |             |       |       |            |          |
|---|-------------|-------|-------|------------|----------|
| 0 | 1.357444075 | 0.879 | 0.571 | 0 Monocyte | S100A10  |
| 0 | 1.355955693 | 0.412 | 0.007 | 0 Monocyte | CLEC4A   |
| 0 | 1.342685903 | 0.858 | 0.431 | 0 Monocyte | LAMTOR4  |
| 0 | 1.339834915 | 0.618 | 0.16  | 0 Monocyte | ANXA5    |
| 0 | 1.339464757 | 0.377 | 0.002 | 0 Monocyte | TMEM176A |
| 0 | 1.338836559 | 0.431 | 0.011 | 0 Monocyte | RAB31    |
| 0 | 1.322954262 | 0.567 | 0.136 | 0 Monocyte | VMP1     |
| 0 | 1.321976785 | 0.376 | 0.123 | 0 Monocyte | IFITM3   |
| 0 | 1.29881901  | 0.586 | 0.136 | 0 Monocyte | ASAH1    |
| 0 | 1.291962886 | 0.696 | 0.261 | 0 Monocyte | TALDO1   |
| 0 | 1.290308805 | 0.995 | 0.922 | 0 Monocyte | H3F3A    |
| 0 | 1.284911326 | 0.663 | 0.203 | 0 Monocyte | ATP6VOB  |
| 0 | 1.279954607 | 0.603 | 0.126 | 0 Monocyte | ZEB2     |
| 0 | 1.278440591 | 0.366 | 0.004 | 0 Monocyte | LILRA5   |
| 0 | 1.276196327 | 0.691 | 0.248 | 0 Monocyte | CARD16   |
| 0 | 1.259159726 | 0.917 | 0.571 | 0 Monocyte | TCEB2    |
| 0 | 1.25698073  | 0.671 | 0.232 | 0 Monocyte | SDCBP    |
| 0 | 1.244302597 | 0.381 | 0.004 | 0 Monocyte | CD302    |
| 0 | 1.240215178 | 0.936 | 0.707 | 0 Monocyte | CALM2    |
| 0 | 1.231839995 | 0.47  | 0.053 | 0 Monocyte | LY86     |
| 0 | 1.226468848 | 0.368 | 0.002 | 0 Monocyte | TNFAIP2  |
| 0 | 1.222719734 | 0.384 | 0.004 | 0 Monocyte | TGFBI    |
| 0 | 1.222564994 | 0.678 | 0.29  | 0 Monocyte | HLA-DPA1 |
| 0 | 1.219623308 | 0.368 | 0.01  | 0 Monocyte | IFI30    |
| 0 | 1.212509731 | 0.543 | 0.116 | 0 Monocyte | HSBP1    |
| 0 | 1.211267857 | 0.524 | 0.1   | 0 Monocyte | PTPRE    |
| 0 | 1.208444196 | 0.314 | 0.001 | 0 Monocyte | MAFB     |
| 0 | 1.206589971 | 0.424 | 0.039 | 0 Monocyte | LYN      |
| 0 | 1.197589472 | 0.651 | 0.199 | 0 Monocyte | GLIPR1   |
| 0 | 1.195099882 | 0.325 | 0.003 | 0 Monocyte | CD93     |
| 0 | 1.189560212 | 0.426 | 0.056 | 0 Monocyte | CAPG     |
| 0 | 1.176559107 | 0.523 | 0.122 | 0 Monocyte | TMEM167A |
| 0 | 1.17556475  | 0.414 | 0.031 | 0 Monocyte | CTSZ     |
| 0 | 1.169292022 | 0.348 | 0.003 | 0 Monocyte | HNMT     |
| 0 | 1.166770377 | 0.441 | 0.101 | 0 Monocyte | SOD2     |
| 0 | 1.156295638 | 0.998 | 0.94  | 0 Monocyte | ATP5E    |
| 0 | 1.150350379 | 0.712 | 0.36  | 0 Monocyte | HLA-DPB1 |
| 0 | 1.147383554 | 0.323 | 0.002 | 0 Monocyte | PLBD1    |
| 0 | 1.147199034 | 0.944 | 0.721 | 0 Monocyte | VIM      |
| 0 | 1.144552303 | 0.361 | 0.009 | 0 Monocyte | RAB32    |
| 0 | 1.133377221 | 0.375 | 0.02  | 0 Monocyte | SMCO4    |
| 0 | 1.131392721 | 0.666 | 0.246 | 0 Monocyte | PGLS     |
| 0 | 1.130949504 | 0.308 | 0.001 | 0 Monocyte | CDA      |
| 0 | 1.129691716 | 0.463 | 0.078 | 0 Monocyte | LYST     |
| 0 | 1.128227133 | 0.331 | 0.002 | 0 Monocyte | PILRA    |
| 0 | 1.125451077 | 0.647 | 0.249 | 0 Monocyte | C10orf54 |
| 0 | 1.124624763 | 0.345 | 0.04  | 0 Monocyte | NAMPT    |
| 0 | 1.121657726 | 0.551 | 0.137 | 0 Monocyte | HLA-DMA  |
| 0 | 1.118043983 | 0.596 | 0.174 | 0 Monocyte | CNPY3    |
| 0 | 1.115663084 | 0.348 | 0.015 | 0 Monocyte | OGFRL1   |
| 0 | 1.115480554 | 0.739 | 0.36  | 0 Monocyte | PRELID1  |

|   |              |       |       |            |           |
|---|--------------|-------|-------|------------|-----------|
| 0 | 1.112382576  | 0.479 | 0.093 | 0 Monocyte | AGTRAP    |
| 0 | 1.109684121  | 0.619 | 0.214 | 0 Monocyte | CTSD      |
| 0 | 1.101220857  | 0.359 | 0.028 | 0 Monocyte | SLC11A1   |
| 0 | 1.085336199  | 0.361 | 0.02  | 0 Monocyte | CPPED1    |
| 0 | 1.083458775  | 0.481 | 0.117 | 0 Monocyte | PPT1      |
| 0 | 1.082061321  | 0.478 | 0.101 | 0 Monocyte | CTSB      |
| 0 | 1.069501388  | 0.335 | 0.008 | 0 Monocyte | C19orf38  |
| 0 | 1.065762789  | 0.438 | 0.065 | 0 Monocyte | CTSH      |
| 0 | 1.062201528  | 0.602 | 0.214 | 0 Monocyte | H2AFY     |
| 0 | 1.055736215  | 0.593 | 0.264 | 0 Monocyte | MCL1      |
| 0 | 1.040909873  | 0.551 | 0.172 | 0 Monocyte | CASP1     |
| 0 | 1.032070841  | 0.426 | 0.095 | 0 Monocyte | C4orf48   |
| 0 | 1.029966219  | 0.726 | 0.344 | 0 Monocyte | NDUFB1    |
| 0 | 1.029232404  | 0.252 | 0.001 | 0 Monocyte | CLEC4E    |
| 0 | 1.025712227  | 0.511 | 0.106 | 0 Monocyte | FGR       |
| 0 | 1.019323882  | 0.596 | 0.222 | 0 Monocyte | SAMHD1    |
| 0 | 1.017400635  | 0.81  | 0.482 | 0 Monocyte | VAMP8     |
| 0 | 1.016768002  | 0.385 | 0.057 | 0 Monocyte | ATP6V1B2  |
| 0 | 1.010809842  | 0.33  | 0.018 | 0 Monocyte | ALDH2     |
| 0 | 1.009550144  | 0.577 | 0.2   | 0 Monocyte | GNAI2     |
| 0 | 1.007599419  | 0.553 | 0.195 | 0 Monocyte | AHNAK     |
| 0 | 1.00749089   | 0.36  | 0.041 | 0 Monocyte | PGD       |
| 0 | 1.005963     | 0.381 | 0.05  | 0 Monocyte | CECR1     |
| 0 | 1.001626039  | 0.835 | 0.488 | 0 Monocyte | RHOA      |
| 0 | 1.001349355  | 0.301 | 0.003 | 0 Monocyte | LRRC25    |
| 0 | -1.032307549 | 0.708 | 0.866 | 0 Monocyte | NPM1      |
| 0 | -1.033884289 | 0.99  | 0.979 | 0 Monocyte | RPL23A    |
| 0 | -1.055414622 | 0.025 | 0.29  | 0 Monocyte | SKAP1     |
| 0 | -1.056194828 | 0.993 | 0.981 | 0 Monocyte | RPS3      |
| 0 | -1.060803927 | 0.125 | 0.405 | 0 Monocyte | TSTD1     |
| 0 | -1.061008399 | 0.588 | 0.792 | 0 Monocyte | CALM1     |
| 0 | -1.088737169 | 0.814 | 0.937 | 0 Monocyte | TXNIP     |
| 0 | -1.10370977  | 0.659 | 0.851 | 0 Monocyte | GLTSCR2   |
| 0 | -1.106371134 | 0.291 | 0.553 | 0 Monocyte | RARRES3   |
| 0 | -1.125472291 | 0.075 | 0.36  | 0 Monocyte | TCF7      |
| 0 | -1.127944619 | 0.981 | 0.973 | 0 Monocyte | RPS29     |
| 0 | -1.131587322 | 1     | 0.991 | 0 Monocyte | MALAT1    |
| 0 | -1.134311653 | 0.16  | 0.47  | 0 Monocyte | GYPC      |
| 0 | -1.137976468 | 0.069 | 0.376 | 0 Monocyte | BIN1      |
| 0 | -1.138008547 | 0.035 | 0.331 | 0 Monocyte | LBH       |
| 0 | -1.148822761 | 0.034 | 0.326 | 0 Monocyte | FCMR      |
| 0 | -1.164106033 | 0.044 | 0.357 | 0 Monocyte | RHOH      |
| 0 | -1.170938865 | 0.33  | 0.642 | 0 Monocyte | TRAF3IP3  |
| 0 | -1.171325727 | 0.268 | 0.521 | 0 Monocyte | NOSIP     |
| 0 | -1.173669772 | 0.063 | 0.367 | 0 Monocyte | LAT       |
| 0 | -1.177968734 | 0.981 | 0.981 | 0 Monocyte | RPL31     |
| 0 | -1.179562552 | 0.627 | 0.81  | 0 Monocyte | BTG1      |
| 0 | -1.180781719 | 0.044 | 0.341 | 0 Monocyte | LINC00861 |
| 0 | -1.192278006 | 0.537 | 0.807 | 0 Monocyte | HSPA8     |
| 0 | -1.199993319 | 0.157 | 0.482 | 0 Monocyte | C12orf57  |
| 0 | -1.204916044 | 0.066 | 0.376 | 0 Monocyte | PIK3IP1   |

|           |              |       |       |           |          |          |
|-----------|--------------|-------|-------|-----------|----------|----------|
| 0         | -1.212761654 | 0.986 | 0.981 | 0         | Monocyte | RPL3     |
| 0         | -1.225285463 | 0.448 | 0.699 | 0         | Monocyte | GIMAP7   |
| 0         | -1.277073171 | 0.234 | 0.57  | 0         | Monocyte | AES      |
| 0         | -1.299329455 | 0.888 | 0.967 | 0         | Monocyte | RPSA     |
| 0         | -1.326339972 | 0.042 | 0.379 | 0         | Monocyte | CD27     |
| 0         | -1.350880946 | 0.098 | 0.462 | 0         | Monocyte | ISG20    |
| 0         | -1.417689077 | 0.217 | 0.604 | 0         | Monocyte | CLEC2D   |
| 0         | -1.447283546 | 0.168 | 0.581 | 0         | Monocyte | ACAP1    |
| 0         | -1.454033562 | 0.044 | 0.357 | 0         | Monocyte | GZMM     |
| 0         | -1.469880338 | 0.239 | 0.55  | 0         | Monocyte | CXCR4    |
| 0         | -1.470335058 | 0.145 | 0.547 | 0         | Monocyte | IL2RG    |
| 0         | -1.527304608 | 0.062 | 0.401 | 0         | Monocyte | IFITM1   |
| 0         | -1.581058465 | 0.428 | 0.736 | 0         | Monocyte | LDHB     |
| 0         | -1.590372519 | 0.048 | 0.395 | 0         | Monocyte | CD247    |
| 0         | -1.628208418 | 0.048 | 0.463 | 0         | Monocyte | CD3G     |
| 0         | -1.671566844 | 0.04  | 0.413 | 0         | Monocyte | CCR7     |
| 0         | -1.701997    | 0.079 | 0.492 | 0         | Monocyte | CD2      |
| 0         | -1.730743777 | 0.065 | 0.547 | 0         | Monocyte | LCK      |
| 0         | -1.743375437 | 0.208 | 0.7   | 0         | Monocyte | EVL      |
| 0         | -2.026117636 | 0.058 | 0.591 | 0         | Monocyte | CD3E     |
| 0         | -2.084908262 | 0.071 | 0.407 | 0         | Monocyte | CTSW     |
| 0         | -2.128777334 | 0.051 | 0.315 | 0         | Monocyte | CST7     |
| 0         | -2.132612866 | 0.078 | 0.564 | 0         | Monocyte | CD7      |
| 0         | -2.183407176 | 0.075 | 0.478 | 0         | Monocyte | TRBC1    |
| 0         | -2.183786402 | 0.077 | 0.535 | 0         | Monocyte | IL7R     |
| 0         | -2.201052031 | 0.087 | 0.605 | 0         | Monocyte | TRBC2    |
| 0         | -2.249302277 | 0.058 | 0.329 | 0         | Monocyte | GZMA     |
| 0         | -2.311634306 | 0.093 | 0.647 | 0         | Monocyte | CD3D     |
| 0         | -2.51355584  | 0.305 | 0.758 | 0         | Monocyte | LTB      |
| 0         | -2.738153718 | 0.09  | 0.686 | 0         | Monocyte | TRAC     |
| 0         | -2.981688923 | 0.124 | 0.709 | 0         | Monocyte | IL32     |
| 1.46E-304 | -1.061648916 | 0.061 | 0.316 | 4.93E-300 | Monocyte | STK17A   |
| 1.87E-304 | -1.021760596 | 0.163 | 0.424 | 6.31E-300 | Monocyte | ANXA6    |
| 2.01E-304 | -2.422633049 | 0.064 | 0.318 | 6.78E-300 | Monocyte | KLRB1    |
| 1.07E-294 | -1.032230689 | 0.034 | 0.276 | 3.60E-290 | Monocyte | ITM2A    |
| 7.50E-274 | -1.921589991 | 0.043 | 0.275 | 2.53E-269 | Monocyte | PRF1     |
| 2.99E-268 | 1.201695524  | 0.564 | 0.308 | 1.01E-263 | Monocyte | MTRNR2L1 |
| 3.89E-257 | -2.763951921 | 0.165 | 0.384 | 1.31E-252 | Monocyte | CCL5     |
| 1.51E-233 | -1.412723225 | 0.045 | 0.253 | 5.09E-229 | Monocyte | HOPX     |
| 1.88E-221 | -3.137183025 | 0.163 | 0.358 | 6.34E-217 | Monocyte | NKG7     |
| 7.10E-196 | -1.026845499 | 0.135 | 0.331 | 2.39E-191 | Monocyte | BIRC3    |
| 7.86E-164 | -3.278251198 | 0.128 | 0.295 | 2.65E-159 | Monocyte | GPLY     |
| 7.14E-82  | -4.225011296 | 0.436 | 0.296 | 2.41E-77  | Monocyte | HBB      |
| 0         | 4.147324979  | 0.982 | 0.034 | 0         | B_cell   | CD79A    |
| 0         | 3.811154021  | 0.702 | 0.114 | 0         | B_cell   | IGKC     |
| 0         | 3.628257704  | 0.83  | 0.036 | 0         | B_cell   | IGHM     |
| 0         | 3.461588316  | 1     | 0.572 | 0         | B_cell   | CD74     |
| 0         | 3.445025351  | 0.373 | 0.016 | 0         | B_cell   | IGLC3    |
| 0         | 3.423698082  | 0.942 | 0.086 | 0         | B_cell   | CD79B    |
| 0         | 3.362840369  | 0.892 | 0.019 | 0         | B_cell   | MS4A1    |
| 0         | 3.348052692  | 0.443 | 0.036 | 0         | B_cell   | IGLC2    |

|   |             |       |       |          |               |       |
|---|-------------|-------|-------|----------|---------------|-------|
| 0 | 3.174942488 | 1     | 0.288 | 0 B_cell | HLA-DRA       |       |
| 0 | 3.156247018 | 0.621 | 0.014 | 0 B_cell | TCL1A         |       |
| 0 | 3.037789861 | 0.686 | 0.01  | 0 B_cell | IGHD          |       |
| 0 | 3.026594625 | 0.787 | 0.011 | 0 B_cell | LINCO0926     |       |
| 0 | 2.885269569 | 0.857 | 0.06  | 0 B_cell | HLA-DQA1      |       |
| 0 | 2.703014774 | 0.892 | 0.145 | 0 B_cell | HLA-DQB1      |       |
| 0 | 2.527234717 | 0.981 | 0.299 | 0 B_cell | HLA-DPA1      |       |
| 0 | 2.51854832  | 0.702 | 0.013 | 0 B_cell | BANK1         |       |
| 0 | 2.483360415 | 0.987 | 0.29  | 0 B_cell | HLA-DRB1      |       |
| 0 | 2.435602875 | 0.979 | 0.369 | 0 B_cell | HLA-DPB1      |       |
| 0 | 2.22804238  | 0.546 | 0.006 | 0 B_cell | VPREB3        |       |
| 0 | 2.06937926  | 0.989 | 0.709 | 0 B_cell | CD37          |       |
| 0 | 2.056789971 | 0.591 | 0.051 | 0 B_cell | HVCN1         |       |
| 0 | 2.053512113 | 0.489 | 0.007 | 0 B_cell | FCER2         |       |
| 0 | 2.005061375 | 0.682 | 0.109 | 0 B_cell | HLA-DMB       |       |
| 0 | 1.828495848 | 0.475 | 0.01  | 0 B_cell | CD22          |       |
| 0 | 1.823383129 | 0.734 | 0.161 | 0 B_cell | HLA-DMA       |       |
| 0 | 1.795252686 | 0.435 | 0.084 | 0 B_cell | IL4R          |       |
| 0 | 1.75131526  | 0.584 | 0.108 | 0 B_cell | MEF2C         |       |
| 0 | 1.748440819 | 0.443 | 0.046 | 0 B_cell | PLPP5         |       |
| 0 | 1.731659737 | 0.617 | 0.106 | 0 B_cell |               | 1-Mar |
| 0 | 1.689674857 | 0.679 | 0.253 | 0 B_cell | BIRC3         |       |
| 0 | 1.685433515 | 0.733 | 0.173 | 0 B_cell | HLA-DRB5      |       |
| 0 | 1.598976224 | 0.628 | 0.18  | 0 B_cell | SNX2          |       |
| 0 | 1.581455744 | 0.455 | 0.029 | 0 B_cell | ARHGAP24      |       |
| 0 | 1.528895647 | 0.377 | 0.009 | 0 B_cell | TNFRSF13C     |       |
| 0 | 1.5099914   | 0.383 | 0.006 | 0 B_cell | HLA-DOB       |       |
| 0 | 1.497880109 | 0.806 | 0.458 | 0 B_cell | CXCR4         |       |
| 0 | 1.49593883  | 0.359 | 0.012 | 0 B_cell | ADAM28        |       |
| 0 | 1.47956062  | 0.363 | 0.009 | 0 B_cell | RP11-693J15.5 |       |
| 0 | 1.424195193 | 0.431 | 0.049 | 0 B_cell | IRF8          |       |
| 0 | 1.397428923 | 0.392 | 0.03  | 0 B_cell | JCHAIN        |       |
| 0 | 1.385731253 | 0.471 | 0.116 | 0 B_cell | STX7          |       |
| 0 | 1.377225332 | 0.323 | 0.011 | 0 B_cell | TSPAN13       |       |
| 0 | 1.349836595 | 0.353 | 0.01  | 0 B_cell | BLK           |       |
| 0 | 1.332568887 | 0.33  | 0.005 | 0 B_cell | FCRLA         |       |
| 0 | 1.327710907 | 0.362 | 0.024 | 0 B_cell | SPIB          |       |
| 0 | 1.324983957 | 0.425 | 0.094 | 0 B_cell | FAM26F        |       |
| 0 | 1.293742338 | 0.342 | 0.034 | 0 B_cell | EAF2          |       |
| 0 | 1.288402337 | 0.343 | 0.016 | 0 B_cell | RALGPS2       |       |
| 0 | 1.271535533 | 0.41  | 0.078 | 0 B_cell | CYB561A3      |       |
| 0 | 1.27030052  | 0.363 | 0.03  | 0 B_cell | SWAP70        |       |
| 0 | 1.252903548 | 0.411 | 0.046 | 0 B_cell | PDLIM1        |       |
| 0 | 1.252857542 | 0.322 | 0.02  | 0 B_cell | CD40          |       |
| 0 | 1.226318788 | 0.305 | 0.016 | 0 B_cell | P2RX5         |       |
| 0 | 1.218056223 | 0.319 | 0.02  | 0 B_cell | GNG7          |       |
| 0 | 1.18668495  | 0.269 | 0.01  | 0 B_cell | CD72          |       |
| 0 | 1.185241951 | 0.275 | 0.004 | 0 B_cell | CD24          |       |
| 0 | 1.179808523 | 0.413 | 0.107 | 0 B_cell | ORAI2         |       |
| 0 | 1.169164641 | 0.297 | 0.019 | 0 B_cell | BCL11A        |       |
| 0 | 1.142455663 | 0.25  | 0.007 | 0 B_cell | KIAA0125      |       |

|           |              |       |       |           |        |          |
|-----------|--------------|-------|-------|-----------|--------|----------|
| 0         | 1.136366164  | 0.319 | 0.048 | 0         | B_cell | GAPT     |
| 0         | 1.132558797  | 0.605 | 0.234 | 0         | B_cell | NCF1     |
| 0         | 1.131326759  | 0.286 | 0.022 | 0         | B_cell | HLA-DQB2 |
| 0         | 1.12298387   | 0.277 | 0.016 | 0         | B_cell | FAM129C  |
| 0         | 1.111590922  | 0.338 | 0.059 | 0         | B_cell | PLEKHF2  |
| 0         | 1.097638116  | 0.261 | 0.004 | 0         | B_cell | CD19     |
| 0         | 1.096689108  | 0.973 | 0.641 | 0         | B_cell | LTB      |
| 0         | 1.045736287  | 0.917 | 0.726 | 0         | B_cell | LAPTM5   |
| 0         | 1.038983651  | 0.268 | 0.009 | 0         | B_cell | BLNK     |
| 0         | 1.021384259  | 0.292 | 0.058 | 0         | B_cell | IFT57    |
| 0         | -1.460311675 | 0.26  | 0.668 | 0         | B_cell | S100A10  |
| 0         | -1.475860587 | 0.08  | 0.495 | 0         | B_cell | LCK      |
| 0         | -1.741251677 | 0.026 | 0.454 | 0         | B_cell | CD2      |
| 0         | -1.912090522 | 0.042 | 0.589 | 0         | B_cell | GIMAP4   |
| 0         | -1.977925309 | 0.034 | 0.537 | 0         | B_cell | CD3E     |
| 0         | -1.998508188 | 0.042 | 0.617 | 0         | B_cell | FYB      |
| 0         | -2.092059626 | 0.038 | 0.578 | 0         | B_cell | ANXA1    |
| 0         | -2.172774953 | 0.036 | 0.517 | 0         | B_cell | CD7      |
| 0         | -2.21565907  | 0.039 | 0.439 | 0         | B_cell | TRBC1    |
| 0         | -2.257946398 | 0.039 | 0.491 | 0         | B_cell | IL7R     |
| 0         | -2.284481605 | 0.134 | 0.588 | 0         | B_cell | S100A11  |
| 0         | -2.318985274 | 0.055 | 0.592 | 0         | B_cell | CD3D     |
| 0         | -2.448114887 | 0.044 | 0.714 | 0         | B_cell | GIMAP7   |
| 0         | -2.464566576 | 0.14  | 0.683 | 0         | B_cell | SRGN     |
| 0         | -2.483082307 | 0.472 | 0.876 | 0         | B_cell | S100A6   |
| 0         | -2.484682956 | 0.119 | 0.769 | 0         | B_cell | HCST     |
| 0         | -2.533029077 | 0.095 | 0.623 | 0         | B_cell | TRAC     |
| 0         | -3.135484338 | 0.067 | 0.653 | 0         | B_cell | IL32     |
| 0         | -3.264409938 | 0.294 | 0.827 | 0         | B_cell | S100A4   |
| 3.68E-305 | -1.594447156 | 0.025 | 0.422 | 1.24E-300 | B_cell | CD3G     |
| 5.89E-301 | -1.423093343 | 0.135 | 0.541 | 1.98E-296 | B_cell | RARRES3  |
| 9.48E-299 | -1.182598055 | 0.64  | 0.87  | 3.19E-294 | B_cell | GAPDH    |
| 3.37E-298 | -1.363331255 | 0.404 | 0.706 | 1.14E-293 | B_cell | LDHB     |
| 8.81E-289 | 1.022169711  | 0.47  | 0.188 | 2.97E-284 | B_cell | SYPL1    |
| 2.76E-272 | -1.82267162  | 0.023 | 0.391 | 9.29E-268 | B_cell | ID2      |
| 1.33E-264 | -1.177677188 | 0.528 | 0.788 | 4.49E-260 | B_cell | VIM      |
| 1.90E-264 | -1.822150424 | 0.239 | 0.593 | 6.39E-260 | B_cell | NEAT1    |
| 6.46E-260 | -2.135722177 | 0.023 | 0.377 | 2.18E-255 | B_cell | CTSW     |
| 7.27E-258 | 1.007264563  | 0.527 | 0.243 | 2.45E-253 | B_cell | FCMR     |
| 1.58E-255 | -1.254735332 | 0.033 | 0.386 | 5.31E-251 | B_cell | GIMAP1   |
| 8.09E-252 | -3.327462758 | 0.053 | 0.394 | 2.73E-247 | B_cell | TYROBP   |
| 6.32E-246 | -1.407971515 | 0.255 | 0.604 | 2.13E-241 | B_cell | ITGB2    |
| 1.93E-233 | -1.532851564 | 0.03  | 0.36  | 6.50E-229 | B_cell | CD247    |
| 1.73E-230 | 1.036901131  | 0.61  | 0.355 | 5.81E-226 | B_cell | RCSL1    |
| 4.11E-229 | -2.587803166 | 0.037 | 0.358 | 1.38E-224 | B_cell | FCER1G   |
| 1.36E-222 | -1.126134038 | 0.08  | 0.42  | 4.57E-218 | B_cell | LEPROTL1 |
| 2.21E-216 | -1.152926337 | 0.113 | 0.451 | 7.46E-212 | B_cell | RGS10    |
| 4.92E-211 | -1.430274814 | 0.022 | 0.326 | 1.66E-206 | B_cell | GZMM     |
| 7.70E-202 | -1.18924409  | 0.184 | 0.503 | 2.59E-197 | B_cell | NOSIP    |
| 3.22E-201 | -1.140044043 | 0.036 | 0.338 | 1.09E-196 | B_cell | LAT      |
| 5.30E-201 | -1.297599802 | 0.052 | 0.358 | 1.79E-196 | B_cell | MT2A     |

|           |              |       |       |                    |           |
|-----------|--------------|-------|-------|--------------------|-----------|
| 2.24E-199 | -2.300404992 | 0.046 | 0.341 | 7.56E-195 B_cell   | AIF1      |
| 4.90E-199 | -3.636606438 | 0.055 | 0.349 | 1.65E-194 B_cell   | NKG7      |
| 3.95E-198 | -1.350012012 | 0.06  | 0.365 | 1.33E-193 B_cell   | IFITM1    |
| 5.48E-198 | -2.247171637 | 0.15  | 0.445 | 1.85E-193 B_cell   | LGALS1    |
| 7.81E-196 | -1.159209918 | 0.022 | 0.312 | 2.63E-191 B_cell   | LINC00861 |
| 9.48E-192 | -2.331314602 | 0.021 | 0.304 | 3.19E-187 B_cell   | GZMA      |
| 2.70E-191 | -1.06786637  | 0.03  | 0.32  | 9.11E-187 B_cell   | SAMHD1    |
| 7.45E-189 | -2.166234833 | 0.014 | 0.291 | 2.51E-184 B_cell   | CST7      |
| 4.60E-187 | -2.981603073 | 0.087 | 0.369 | 1.55E-182 B_cell   | CCL5      |
| 8.36E-181 | -1.155048098 | 0.433 | 0.694 | 2.82E-176 B_cell   | IFITM2    |
| 1.73E-177 | -2.589171597 | 0.028 | 0.295 | 5.83E-173 B_cell   | KLRB1     |
| 8.27E-174 | -1.097309338 | 0.028 | 0.296 | 2.79E-169 B_cell   | DOK2      |
| 2.67E-171 | -1.165408345 | 0.038 | 0.307 | 8.98E-167 B_cell   | TIMP1     |
| 2.97E-163 | -1.15397197  | 0.131 | 0.409 | 1.00E-158 B_cell   | MYO1F     |
| 3.56E-159 | -1.090761188 | 0.055 | 0.316 | 1.20E-154 B_cell   | CTSD      |
| 1.69E-156 | -1.20437642  | 0.26  | 0.532 | 5.70E-152 B_cell   | TSPO      |
| 3.74E-156 | -1.230195129 | 0.279 | 0.53  | 1.26E-151 B_cell   | TRBC2     |
| 5.06E-154 | -1.940933875 | 0.016 | 0.253 | 1.71E-149 B_cell   | PRF1      |
| 8.32E-153 | -1.028468636 | 0.079 | 0.341 | 2.80E-148 B_cell   | XBP1      |
| 1.29E-135 | -2.871891828 | 0.05  | 0.272 | 4.36E-131 B_cell   | CST3      |
| 3.50E-130 | -3.816891189 | 0.065 | 0.284 | 1.18E-125 B_cell   | GNLY      |
| 2.03E-94  | -3.961360662 | 0.135 | 0.317 | 6.84E-90 B_cell    | LYZ       |
| 1.03E-87  | -4.152903607 | 0.154 | 0.333 | 3.47E-83 B_cell    | S100A8    |
| 3.78E-87  | -4.495000782 | 0.206 | 0.383 | 1.27E-82 B_cell    | S100A9    |
| 6.83E-84  | -1.845529896 | 0.111 | 0.278 | 2.30E-79 B_cell    | LST1      |
| 4.69E-66  | -1.060419118 | 0.253 | 0.404 | 1.58E-61 B_cell    | PSAP      |
| 1.41E-06  | -1.070123514 | 0.987 | 0.979 | 0.047358823 B_cell | FTL       |
| 0         | 6.91377651   | 1     | 0.133 | 0 BM               | HBA2      |
| 0         | 6.810266054  | 1     | 0.059 | 0 BM               | HBA1      |
| 0         | 5.559394208  | 1     | 0.013 | 0 BM               | HBD       |
| 0         | 4.091107092  | 0.988 | 0.006 | 0 BM               | AHSP      |
| 0         | 4.016574305  | 0.988 | 0.008 | 0 BM               | ALAS2     |
| 0         | 3.99595668   | 1     | 0.039 | 0 BM               | SNCA      |
| 0         | 3.570600475  | 0.838 | 0.006 | 0 BM               | HBM       |
| 0         | 3.309826136  | 0.901 | 0.003 | 0 BM               | CA1       |
| 0         | 3.308874613  | 1     | 0.131 | 0 BM               | SLC25A37  |
| 0         | 2.494814939  | 0.866 | 0.041 | 0 BM               | BPGM      |
| 0         | 2.454379411  | 0.964 | 0.135 | 0 BM               | SLC25A39  |
| 0         | 2.335149652  | 0.937 | 0.046 | 0 BM               | DCAF12    |
| 0         | 2.048500546  | 0.858 | 0.007 | 0 BM               | HBE1      |
| 0         | 2.0101353    | 0.866 | 0.004 | 0 BM               | SELENBP1  |
| 0         | 1.962644713  | 0.81  | 0.011 | 0 BM               | HBQ1      |
| 0         | 1.949610254  | 0.885 | 0.047 | 0 BM               | STRADB    |
| 0         | 1.928576048  | 0.802 | 0.023 | 0 BM               | FECH      |
| 0         | 1.678252252  | 0.877 | 0.114 | 0 BM               | ADIPOR1   |
| 0         | 1.676955821  | 0.83  | 0.057 | 0 BM               | MPP1      |
| 0         | 1.555166908  | 0.692 | 0.002 | 0 BM               | GYPB      |
| 0         | 1.518168651  | 0.715 | 0.01  | 0 BM               | SLC4A1    |
| 0         | 1.473670864  | 0.447 | 0.001 | 0 BM               | IFIT1B    |
| 0         | 1.470257401  | 0.502 | 0.016 | 0 BM               | HEMGN     |
| 0         | 1.368024042  | 0.439 | 0.01  | 0 BM               | KRT1      |

|           |              |       |       |              |        |
|-----------|--------------|-------|-------|--------------|--------|
| 0         | 1.141103235  | 0.625 | 0.045 | 0 BM         | BCL2L1 |
| 0         | 1.121526379  | 0.534 | 0.003 | 0 BM         | HBZ    |
| 3.83E-277 | 2.513606471  | 0.988 | 0.212 | 1.29E-272 BM | BNIP3L |
| 1.86E-265 | 2.074890127  | 0.957 | 0.165 | 6.28E-261 BM | BLVRB  |
| 5.51E-233 | 6.598608041  | 1     | 0.316 | 1.85E-228 BM | HBB    |
| 3.10E-219 | 1.756371049  | 0.858 | 0.147 | 1.05E-214 BM | LGALS3 |
| 2.35E-218 | 2.249616204  | 0.953 | 0.235 | 7.91E-214 BM | MKRN1  |
| 1.26E-200 | 1.505892092  | 0.877 | 0.162 | 4.23E-196 BM | FBX07  |
| 5.66E-166 | 1.622362815  | 0.846 | 0.196 | 1.91E-161 BM | NCOA4  |
| 1.86E-162 | -4.790807931 | 0.874 | 0.998 | 6.27E-158 BM | B2M    |
| 6.69E-162 | -4.440421971 | 0.518 | 0.994 | 2.25E-157 BM | MT-CO2 |
| 9.83E-162 | -5.399141094 | 0.53  | 0.994 | 3.31E-157 BM | RPL10  |
| 1.38E-161 | -4.260266453 | 0.605 | 0.994 | 4.64E-157 BM | MT-CO3 |
| 1.68E-161 | -4.958968184 | 0.644 | 0.994 | 5.65E-157 BM | RPLP1  |
| 2.79E-161 | -4.2097949   | 0.498 | 0.993 | 9.41E-157 BM | MT-ND4 |
| 2.96E-161 | -5.031436868 | 0.451 | 0.992 | 9.99E-157 BM | RPS27A |
| 3.20E-161 | -5.190955361 | 0.549 | 0.994 | 1.08E-156 BM | RPL13A |
| 3.89E-161 | -5.327353162 | 0.597 | 0.993 | 1.31E-156 BM | EEF1A1 |
| 4.04E-161 | -5.147575194 | 0.364 | 0.991 | 1.36E-156 BM | RPS19  |
| 4.75E-161 | -4.972876557 | 0.285 | 0.99  | 1.60E-156 BM | TMSB10 |
| 7.06E-161 | -4.206047764 | 0.771 | 0.995 | 2.38E-156 BM | RPL21  |
| 7.39E-161 | -4.366958298 | 0.229 | 0.99  | 2.49E-156 BM | PTMA   |
| 8.27E-161 | -6.431264056 | 0.791 | 0.995 | 2.79E-156 BM | MALAT1 |
| 1.03E-160 | -4.470420688 | 0.51  | 0.993 | 3.46E-156 BM | RPL41  |
| 1.11E-160 | -4.774252478 | 0.589 | 0.993 | 3.76E-156 BM | RPS15A |
| 1.22E-160 | -4.819588738 | 0.577 | 0.993 | 4.11E-156 BM | RPS14  |
| 1.28E-160 | -3.521467176 | 0.905 | 0.996 | 4.31E-156 BM | MT-CO1 |
| 1.35E-160 | -4.984573272 | 0.498 | 0.991 | 4.54E-156 BM | RPS2   |
| 1.39E-160 | -5.535127809 | 0.526 | 0.993 | 4.69E-156 BM | RPS27  |
| 1.87E-160 | -4.945546221 | 0.344 | 0.99  | 6.32E-156 BM | RPL27A |
| 2.02E-160 | -4.886130867 | 0.617 | 0.993 | 6.80E-156 BM | RPLP2  |
| 2.04E-160 | -5.299937495 | 0.403 | 0.991 | 6.88E-156 BM | RPS18  |
| 2.05E-160 | -4.572534202 | 0.332 | 0.99  | 6.90E-156 BM | RPL15  |
| 2.09E-160 | -4.867548081 | 0.462 | 0.991 | 7.06E-156 BM | RPS3A  |
| 2.09E-160 | -4.88086438  | 0.265 | 0.989 | 7.06E-156 BM | RPL26  |
| 2.57E-160 | -4.859316489 | 0.526 | 0.992 | 8.65E-156 BM | RPL32  |
| 2.63E-160 | -4.583553926 | 0.36  | 0.99  | 8.85E-156 BM | HLA-B  |
| 3.02E-160 | -5.004579418 | 0.308 | 0.99  | 1.02E-155 BM | RPS28  |
| 3.09E-160 | -4.81988008  | 0.387 | 0.99  | 1.04E-155 BM | RPL28  |
| 3.79E-160 | -5.151720746 | 0.328 | 0.99  | 1.28E-155 BM | RPL39  |
| 4.47E-160 | -5.035692929 | 0.304 | 0.988 | 1.51E-155 BM | RPL23A |
| 4.89E-160 | -4.928938162 | 0.308 | 0.99  | 1.65E-155 BM | RPS3   |
| 5.12E-160 | -4.377816114 | 0.609 | 0.992 | 1.72E-155 BM | TPT1   |
| 5.24E-160 | -4.996414615 | 0.672 | 0.993 | 1.76E-155 BM | RPL13  |
| 6.67E-160 | -3.998023427 | 0.874 | 0.998 | 2.25E-155 BM | TMSB4X |
| 7.56E-160 | -4.658592886 | 0.53  | 0.991 | 2.55E-155 BM | RPL11  |
| 7.96E-160 | -5.250162546 | 0.443 | 0.991 | 2.68E-155 BM | RPL34  |
| 8.51E-160 | -4.814226418 | 0.423 | 0.989 | 2.87E-155 BM | RPL18A |
| 1.01E-159 | -4.323278906 | 0.53  | 0.991 | 3.40E-155 BM | RPL35A |
| 1.07E-159 | -3.852150434 | 0.526 | 0.992 | 3.61E-155 BM | MT-ND2 |
| 1.12E-159 | -4.361539395 | 0.486 | 0.991 | 3.76E-155 BM | RPL7   |

|            |               |        |        |               |         |
|------------|---------------|--------|--------|---------------|---------|
| 1. 30E-159 | -4. 895044394 | 0. 3   | 0. 988 | 4. 40E-155 BM | RPS4X   |
| 1. 52E-159 | -4. 275879879 | 0. 557 | 0. 991 | 5. 12E-155 BM | RPS15   |
| 1. 95E-159 | -4. 899066735 | 0. 324 | 0. 988 | 6. 58E-155 BM | RPS8    |
| 1. 98E-159 | -4. 954269473 | 0. 285 | 0. 988 | 6. 67E-155 BM | RPS23   |
| 1. 99E-159 | -4. 804217871 | 0. 403 | 0. 989 | 6. 70E-155 BM | RPL19   |
| 2. 40E-159 | -3. 972678323 | 0. 403 | 0. 988 | 8. 09E-155 BM | FAU     |
| 2. 48E-159 | -4. 948554043 | 0. 494 | 0. 99  | 8. 35E-155 BM | RPS6    |
| 2. 66E-159 | -4. 879297597 | 0. 202 | 0. 986 | 8. 95E-155 BM | RPL37   |
| 2. 66E-159 | -4. 195527997 | 0. 289 | 0. 987 | 8. 95E-155 BM | MT-ND3  |
| 5. 35E-159 | -4. 59784252  | 0. 229 | 0. 985 | 1. 80E-154 BM | RPL37A  |
| 5. 70E-159 | -4. 105538124 | 0. 427 | 0. 988 | 1. 92E-154 BM | MT-CYB  |
| 6. 09E-159 | -4. 896299216 | 0. 352 | 0. 988 | 2. 05E-154 BM | RPL3    |
| 6. 14E-159 | -4. 425973243 | 0. 553 | 0. 989 | 2. 07E-154 BM | RPL30   |
| 9. 66E-159 | -4. 725533769 | 0. 328 | 0. 987 | 3. 25E-154 BM | RPS25   |
| 9. 68E-159 | -3. 88954647  | 0. 917 | 0. 995 | 3. 26E-154 BM | RPS12   |
| 2. 02E-158 | -4. 203890989 | 0. 344 | 0. 985 | 6. 80E-154 BM | RPS24   |
| 2. 15E-158 | -4. 437889854 | 0. 249 | 0. 984 | 7. 25E-154 BM | RPL18   |
| 2. 36E-158 | -4. 656246706 | 0. 312 | 0. 986 | 7. 96E-154 BM | RPL9    |
| 2. 91E-158 | -4. 415355733 | 0. 213 | 0. 984 | 9. 82E-154 BM | RPS9    |
| 3. 19E-158 | -4. 347204091 | 0. 292 | 0. 984 | 1. 08E-153 BM | RPL8    |
| 3. 21E-158 | -4. 697800062 | 0. 245 | 0. 984 | 1. 08E-153 BM | RPS20   |
| 3. 96E-158 | -4. 403467859 | 0. 372 | 0. 985 | 1. 34E-153 BM | RPL12   |
| 4. 02E-158 | -4. 657250511 | 0. 221 | 0. 984 | 1. 36E-153 BM | RPS16   |
| 5. 01E-158 | -4. 231020256 | 0. 328 | 0. 984 | 1. 69E-153 BM | RPL6    |
| 5. 62E-158 | -4. 41533918  | 0. 209 | 0. 983 | 1. 89E-153 BM | RPS7    |
| 6. 00E-158 | -4. 417280494 | 0. 209 | 0. 982 | 2. 02E-153 BM | RPL27   |
| 6. 07E-158 | -4. 447754302 | 0. 375 | 0. 985 | 2. 05E-153 BM | RPS17   |
| 7. 08E-158 | -4. 375892792 | 0. 241 | 0. 984 | 2. 39E-153 BM | RPL35   |
| 1. 06E-157 | -4. 311731765 | 0. 249 | 0. 983 | 3. 59E-153 BM | RPL29   |
| 1. 11E-157 | -4. 422363807 | 0. 209 | 0. 982 | 3. 75E-153 BM | RPL14   |
| 1. 40E-157 | -4. 411983738 | 0. 415 | 0. 986 | 4. 70E-153 BM | RPS13   |
| 2. 81E-157 | -3. 830468936 | 0. 589 | 0. 989 | 9. 46E-153 BM | MT-ATP6 |
| 5. 94E-157 | -4. 464128717 | 0. 198 | 0. 981 | 2. 00E-152 BM | RPL36   |
| 6. 28E-157 | -4. 554199479 | 0. 241 | 0. 982 | 2. 12E-152 BM | RPS29   |
| 7. 34E-157 | -4. 377193648 | 0. 451 | 0. 986 | 2. 47E-152 BM | RPL31   |
| 5. 70E-156 | -4. 421003359 | 0. 221 | 0. 979 | 1. 92E-151 BM | RPL10A  |
| 1. 44E-155 | -4. 276723355 | 0. 134 | 0. 976 | 4. 86E-151 BM | RPS21   |
| 2. 39E-155 | -4. 157478519 | 0. 138 | 0. 974 | 8. 05E-151 BM | GNB2L1  |
| 4. 86E-154 | -3. 724021232 | 0. 498 | 0. 979 | 1. 64E-149 BM | RPS11   |
| 5. 05E-154 | -3. 865883121 | 0. 372 | 0. 977 | 1. 70E-149 BM | RPL38   |
| 8. 43E-154 | -4. 292991703 | 0. 233 | 0. 973 | 2. 84E-149 BM | RPS5    |
| 1. 78E-153 | -4. 13971901  | 0. 217 | 0. 972 | 6. 01E-149 BM | RPL7A   |
| 5. 98E-153 | -4. 214274189 | 0. 209 | 0. 971 | 2. 01E-148 BM | HLA-C   |
| 1. 50E-152 | 1. 064656925  | 0. 696 | 0. 12  | 5. 06E-148 BM | ISCA1   |
| 2. 36E-152 | -3. 803517048 | 0. 225 | 0. 97  | 7. 94E-148 BM | RPL24   |
| 3. 27E-152 | -3. 922080526 | 0. 348 | 0. 973 | 1. 10E-147 BM | HLA-A   |
| 5. 31E-152 | -4. 169870726 | 0. 134 | 0. 963 | 1. 79E-147 BM | RPL23   |
| 1. 08E-151 | -4. 190453849 | 0. 245 | 0. 969 | 3. 64E-147 BM | RPL5    |
| 7. 07E-151 | -4. 060663093 | 0. 158 | 0. 963 | 2. 38E-146 BM | RPL22   |
| 1. 14E-149 | -3. 243983636 | 0. 569 | 0. 977 | 3. 83E-145 BM | MT-ND1  |
| 4. 90E-149 | -4. 243549516 | 0. 206 | 0. 959 | 1. 65E-144 BM | RPSA    |



|            |               |        |        |               |          |
|------------|---------------|--------|--------|---------------|----------|
| 1. 07E-147 | -3. 546350487 | 0. 13  | 0. 952 | 3. 61E-143 BM | EEF1D    |
| 2. 57E-147 | 2. 325620001  | 0. 996 | 0. 829 | 8. 65E-143 BM | UBB      |
| 8. 87E-147 | -4. 291978449 | 0. 126 | 0. 95  | 2. 99E-142 BM | RPS26    |
| 6. 35E-146 | -3. 215125564 | 0. 419 | 0. 962 | 2. 14E-141 BM | NACA     |
| 1. 79E-145 | -3. 718243478 | 0. 269 | 0. 953 | 6. 03E-141 BM | RPL4     |
| 1. 30E-144 | -3. 833695577 | 0. 111 | 0. 945 | 4. 40E-140 BM | PFN1     |
| 1. 36E-144 | -3. 875327035 | 0. 162 | 0. 946 | 4. 59E-140 BM | RPLP0    |
| 8. 25E-143 | -2. 025896421 | 0. 957 | 0. 99  | 2. 78E-138 BM | UBA52    |
| 4. 18E-142 | -4. 024964735 | 0. 186 | 0. 939 | 1. 41E-137 BM | CD52     |
| 2. 07E-139 | -2. 926563797 | 0. 443 | 0. 951 | 6. 98E-135 BM | PFDN5    |
| 1. 98E-138 | -3. 461710258 | 0. 071 | 0. 92  | 6. 67E-134 BM | TOMM7    |
| 1. 39E-137 | -3. 376932588 | 0. 123 | 0. 923 | 4. 67E-133 BM | CFL1     |
| 2. 85E-136 | -3. 545298339 | 0. 134 | 0. 921 | 9. 61E-132 BM | TXNIP    |
| 5. 59E-135 | -3. 1637531   | 0. 138 | 0. 915 | 1. 88E-130 BM | COX4I1   |
| 2. 96E-133 | -2. 953947069 | 0. 719 | 0. 99  | 9. 97E-129 BM | ACTB     |
| 3. 53E-133 | -2. 205135596 | 0. 806 | 0. 977 | 1. 19E-128 BM | EIF1     |
| 1. 29E-132 | -3. 618250409 | 0. 103 | 0. 906 | 4. 36E-128 BM | EEF1B2   |
| 2. 26E-131 | 1. 556623161  | 0. 972 | 0. 363 | 7. 61E-127 BM | FKBP8    |
| 1. 13E-130 | -2. 951899234 | 0. 265 | 0. 913 | 3. 82E-126 BM | COX7C    |
| 6. 39E-128 | -2. 986936685 | 0. 123 | 0. 894 | 2. 15E-123 BM | ARHGD1B  |
| 1. 96E-127 | -3. 305357205 | 0. 091 | 0. 887 | 6. 62E-123 BM | NBEAL1   |
| 2. 30E-127 | -3. 134020345 | 0. 138 | 0. 896 | 7. 75E-123 BM | HLA-E    |
| 2. 37E-127 | -3. 267590972 | 0. 13  | 0. 893 | 7. 97E-123 BM | RPS10    |
| 1. 93E-126 | 1. 199745905  | 0. 688 | 0. 14  | 6. 49E-122 BM | PITHD1   |
| 1. 28E-125 | -2. 677050001 | 0. 407 | 0. 941 | 4. 31E-121 BM | H3F3A    |
| 2. 39E-124 | -3. 116776019 | 0. 063 | 0. 873 | 8. 07E-120 BM | HNRNPA1  |
| 2. 53E-124 | -2. 851035874 | 0. 19  | 0. 894 | 8. 53E-120 BM | RPL36AL  |
| 8. 75E-123 | -3. 031688219 | 0. 107 | 0. 874 | 2. 95E-118 BM | CORO1A   |
| 1. 40E-122 | -2. 861416157 | 0. 253 | 0. 903 | 4. 73E-118 BM | MYL12A   |
| 5. 31E-121 | -3. 02683593  | 0. 103 | 0. 869 | 1. 79E-116 BM | H3F3B    |
| 8. 29E-121 | -3. 040251261 | 0. 17  | 0. 875 | 2. 79E-116 BM | EEF2     |
| 2. 23E-120 | -3. 25962646  | 0. 142 | 0. 877 | 7. 51E-116 BM | ACTG1    |
| 4. 66E-119 | -2. 667930545 | 0. 213 | 0. 877 | 1. 57E-114 BM | TMA7     |
| 2. 33E-118 | -2. 633275016 | 0. 281 | 0. 889 | 7. 84E-114 BM | UQCRB    |
| 4. 95E-118 | -2. 903819202 | 0. 055 | 0. 854 | 1. 67E-113 BM | DDX5     |
| 3. 55E-117 | -2. 794973971 | 0. 273 | 0. 883 | 1. 20E-112 BM | PABPC1   |
| 3. 26E-116 | -3. 127838784 | 0. 043 | 0. 844 | 1. 10E-111 BM | NPM1     |
| 3. 82E-115 | -3. 209946849 | 0. 138 | 0. 855 | 1. 29E-110 BM | GAPDH    |
| 4. 49E-115 | -3. 432230449 | 0. 174 | 0. 861 | 1. 51E-110 BM | CYBA     |
| 7. 69E-113 | -4. 031866378 | 0. 142 | 0. 845 | 2. 59E-108 BM | S100A6   |
| 5. 43E-112 | -2. 876750343 | 0. 083 | 0. 833 | 1. 83E-107 BM | SLC25A6  |
| 1. 33E-111 | -2. 903384837 | 0. 099 | 0. 839 | 4. 49E-107 BM | RPL36A   |
| 1. 51E-111 | -2. 778387933 | 0. 063 | 0. 83  | 5. 09E-107 BM | COMMD6   |
| 7. 83E-109 | -2. 334558687 | 0. 391 | 0. 875 | 2. 64E-104 BM | ATP5L    |
| 8. 62E-109 | -2. 938859447 | 0. 063 | 0. 822 | 2. 91E-104 BM | GLTSCR2  |
| 1. 35E-108 | -2. 829270671 | 0. 083 | 0. 828 | 4. 54E-104 BM | EIF3E    |
| 5. 34E-108 | -2. 847188431 | 0. 063 | 0. 819 | 1. 80E-103 BM | ARPC2    |
| 1. 10E-103 | -2. 689508017 | 0. 067 | 0. 8   | 3. 70E-99 BM  | PPIA     |
| 1. 76E-103 | -2. 559187663 | 0. 553 | 0. 897 | 5. 92E-99 BM  | SH3BGRL3 |
| 3. 14E-103 | -2. 408410684 | 0. 85  | 0. 975 | 1. 06E-98 BM  | FTH1     |
| 1. 09E-102 | -2. 644578862 | 0. 119 | 0. 812 | 3. 66E-98 BM  | HINT1    |

|            |               |        |        |              |           |
|------------|---------------|--------|--------|--------------|-----------|
| 5. 38E-102 | -2. 655098123 | 0. 063 | 0. 798 | 1. 81E-97 BM | ATP5G2    |
| 9. 80E-101 | -2. 288320937 | 0. 344 | 0. 857 | 3. 30E-96 BM | ITM2B     |
| 1. 13E-100 | -2. 435011786 | 0. 123 | 0. 805 | 3. 79E-96 BM | SRP14     |
| 1. 73E-100 | -2. 723348268 | 0. 036 | 0. 784 | 5. 83E-96 BM | RPL17     |
| 4. 77E-100 | -1. 766708452 | 0. 715 | 0. 92  | 1. 61E-95 BM | BTF3      |
| 1. 61E-98  | -2. 955691705 | 0. 059 | 0. 782 | 5. 44E-94 BM | BTG1      |
| 2. 05E-95  | -2. 466631297 | 0. 043 | 0. 761 | 6. 91E-91 BM | SUMO2     |
| 9. 62E-95  | -2. 684234322 | 0. 063 | 0. 763 | 3. 24E-90 BM | EMP3      |
| 1. 59E-94  | -3. 048966013 | 0. 091 | 0. 77  | 5. 34E-90 BM | VIM       |
| 3. 64E-94  | -2. 504162585 | 0. 055 | 0. 761 | 1. 23E-89 BM | GMFG      |
| 1. 82E-93  | -2. 54179051  | 0. 036 | 0. 751 | 6. 12E-89 BM | LAPTM5    |
| 3. 38E-93  | -2. 541943213 | 0. 043 | 0. 753 | 1. 14E-88 BM | FXYD5     |
| 5. 39E-93  | -2. 570716103 | 0. 02  | 0. 747 | 1. 82E-88 BM | PTPRC     |
| 7. 72E-93  | -2. 632064444 | 0. 083 | 0. 762 | 2. 60E-88 BM | HSPA8     |
| 1. 16E-92  | -2. 468763542 | 0. 055 | 0. 757 | 3. 91E-88 BM | SRSF5     |
| 5. 61E-92  | -2. 522256585 | 0. 146 | 0. 779 | 1. 89E-87 BM | SARAF     |
| 7. 98E-92  | -2. 349438549 | 0. 091 | 0. 77  | 2. 69E-87 BM | HMGB1     |
| 1. 08E-91  | -4. 262613609 | 0. 19  | 0. 782 | 3. 65E-87 BM | S100A4    |
| 4. 75E-90  | -2. 584357938 | 0. 099 | 0. 759 | 1. 60E-85 BM | CALM1     |
| 2. 35E-89  | -2. 68412396  | 0. 055 | 0. 742 | 7. 91E-85 BM | CD37      |
| 2. 40E-89  | -2. 460629638 | 0. 142 | 0. 762 | 8. 09E-85 BM | ARPC3     |
| 3. 66E-88  | -2. 459570212 | 0. 036 | 0. 729 | 1. 23E-83 BM | CD48      |
| 1. 14E-87  | -2. 419906241 | 0. 158 | 0. 762 | 3. 85E-83 BM | MT-ND5    |
| 1. 79E-87  | -2. 448310169 | 0. 13  | 0. 757 | 6. 03E-83 BM | CALM2     |
| 1. 02E-84  | -2. 126800899 | 0. 368 | 0. 81  | 3. 45E-80 BM | UBC       |
| 1. 59E-84  | -2. 316630454 | 0. 071 | 0. 724 | 5. 35E-80 BM | SUB1      |
| 4. 03E-84  | -2. 385167026 | 0. 099 | 0. 74  | 1. 36E-79 BM | NAP1L1    |
| 1. 06E-82  | -2. 276095535 | 0. 067 | 0. 718 | 3. 57E-78 BM | HNRNPA2B1 |
| 2. 40E-82  | -2. 167677206 | 0. 194 | 0. 749 | 8. 09E-78 BM | EIF3K     |
| 3. 19E-82  | -2. 810876379 | 0. 063 | 0. 714 | 1. 07E-77 BM | HCST      |
| 1. 73E-81  | -2. 244931145 | 0. 047 | 0. 704 | 5. 82E-77 BM | EDF1      |
| 8. 82E-81  | 1. 164167793  | 0. 964 | 0. 406 | 2. 97E-76 BM | GYPC      |
| 1. 15E-80  | 1. 174953013  | 0. 842 | 0. 292 | 3. 88E-76 BM | BSG       |
| 1. 66E-79  | -2. 21872198  | 0. 04  | 0. 691 | 5. 60E-75 BM | EIF3F     |
| 1. 94E-79  | -2. 186150627 | 0. 059 | 0. 701 | 6. 53E-75 BM | COX6C     |
| 3. 18E-79  | -2. 187866201 | 0. 087 | 0. 707 | 1. 07E-74 BM | SNRPD2    |
| 6. 45E-78  | -2. 206257252 | 0. 095 | 0. 702 | 2. 17E-73 BM | MYL12B    |
| 1. 23E-77  | -2. 259577677 | 0. 071 | 0. 695 | 4. 14E-73 BM | LIMD2     |
| 1. 83E-77  | -2. 73774542  | 0. 043 | 0. 684 | 6. 18E-73 BM | LDHB      |
| 2. 90E-75  | -2. 315725234 | 0. 138 | 0. 707 | 9. 77E-71 BM | ARPC1B    |
| 1. 09E-74  | -3. 524495793 | 0. 059 | 0. 678 | 3. 66E-70 BM | LTB       |
| 2. 94E-74  | -2. 110610496 | 0. 083 | 0. 684 | 9. 92E-70 BM | GPSM3     |
| 1. 93E-72  | -2. 540880658 | 0. 079 | 0. 675 | 6. 51E-68 BM | IFITM2    |
| 2. 16E-72  | -2. 215245494 | 0. 012 | 0. 646 | 7. 27E-68 BM | ZNF90     |
| 6. 02E-72  | -2. 107705322 | 0. 123 | 0. 687 | 2. 03E-67 BM | PSME1     |
| 7. 16E-72  | -2. 001522459 | 0. 099 | 0. 68  | 2. 41E-67 BM | ATP6V1G1  |
| 1. 92E-71  | -2. 222215617 | 0. 04  | 0. 651 | 6. 46E-67 BM | ZFAS1     |
| 4. 29E-71  | -2. 446555467 | 0. 051 | 0. 657 | 1. 45E-66 BM | GIMAP7    |
| 1. 01E-70  | -2. 091825573 | 0. 107 | 0. 68  | 3. 40E-66 BM | ALDOA     |
| 1. 73E-70  | -2. 071565645 | 0. 063 | 0. 662 | 5. 82E-66 BM | CIRBP     |
| 1. 84E-70  | -1. 948224661 | 0. 206 | 0. 709 | 6. 18E-66 BM | CHCHD2    |

|           |               |        |        |              |            |
|-----------|---------------|--------|--------|--------------|------------|
| 2. 87E-69 | -1. 273291078 | 0. 941 | 0. 953 | 9. 67E-65 BM | SERF2      |
| 8. 05E-69 | -2. 004124878 | 0. 126 | 0. 68  | 2. 71E-64 BM | HSP90AA1   |
| 8. 66E-69 | -2. 052747885 | 0. 051 | 0. 643 | 2. 92E-64 BM | SSR2       |
| 6. 13E-68 | -2. 043996605 | 0. 063 | 0. 643 | 2. 06E-63 BM | EIF3H      |
| 1. 29E-67 | -2. 073560766 | 0. 04  | 0. 635 | 4. 36E-63 BM | PNISR      |
| 1. 43E-67 | -1. 988506209 | 0. 13  | 0. 668 | 4. 83E-63 BM | COX7A2     |
| 5. 82E-67 | -2. 058847275 | 0. 024 | 0. 624 | 1. 96E-62 BM | YWHAB      |
| 2. 45E-66 | -2. 426245287 | 0. 055 | 0. 635 | 8. 26E-62 BM | S100A10    |
| 3. 74E-65 | -2. 215286367 | 0. 976 | 0. 979 | 1. 26E-60 BM | FTL        |
| 4. 03E-65 | -1. 994237352 | 0. 059 | 0. 632 | 1. 36E-60 BM | SSR4       |
| 4. 16E-65 | -2. 034630377 | 0. 071 | 0. 637 | 1. 40E-60 BM | EIF4A2     |
| 4. 46E-65 | -2. 182279739 | 0. 079 | 0. 641 | 1. 50E-60 BM | NHSL2      |
| 6. 16E-65 | -1. 942496631 | 0. 087 | 0. 643 | 2. 07E-60 BM | ATP6VOE1   |
| 2. 06E-64 | -1. 786278393 | 0. 285 | 0. 719 | 6. 95E-60 BM | COX6B1     |
| 3. 34E-64 | -1. 956857508 | 0. 067 | 0. 626 | 1. 12E-59 BM | C19orf43   |
| 4. 13E-64 | -2. 141843562 | 0. 115 | 0. 648 | 1. 39E-59 BM | C14orf2    |
| 1. 70E-63 | 1. 040489819  | 0. 893 | 0. 407 | 5. 74E-59 BM | GABARAPL2  |
| 6. 91E-63 | -1. 949982335 | 0. 016 | 0. 6   | 2. 33E-58 BM | ERP29      |
| 1. 10E-62 | -1. 939462798 | 0. 055 | 0. 617 | 3. 71E-58 BM | EIF3L      |
| 1. 74E-62 | -2. 132770543 | 0. 043 | 0. 612 | 5. 85E-58 BM | EVL        |
| 1. 81E-62 | -1. 822523864 | 0. 245 | 0. 705 | 6. 08E-58 BM | PPDPF      |
| 2. 35E-62 | -1. 847452155 | 0. 111 | 0. 642 | 7. 91E-58 BM | NDUFA4     |
| 2. 46E-62 | -2. 059466361 | 0. 047 | 0. 611 | 8. 29E-58 BM | RAC2       |
| 1. 11E-61 | -2. 689429565 | 0. 115 | 0. 636 | 3. 73E-57 BM | SRGN       |
| 1. 69E-61 | -1. 953878689 | 0. 004 | 0. 582 | 5. 68E-57 BM | N4BP2L2    |
| 1. 81E-61 | -3. 30588569  | 0. 043 | 0. 603 | 6. 11E-57 BM | IL32       |
| 6. 01E-61 | -1. 923933884 | 0. 083 | 0. 618 | 2. 02E-56 BM | COX5B      |
| 7. 55E-61 | -1. 934715928 | 0. 071 | 0. 62  | 2. 54E-56 BM | UQCRH      |
| 4. 87E-60 | -2. 035857158 | 0. 04  | 0. 591 | 1. 64E-55 BM | LSP1       |
| 1. 66E-59 | -1. 927801409 | 0. 04  | 0. 588 | 5. 58E-55 BM | EIF3G      |
| 1. 92E-59 | -2. 186155722 | 0. 04  | 0. 592 | 6. 48E-55 BM | ACO90498.1 |
| 3. 00E-59 | -1. 943837834 | 0. 075 | 0. 605 | 1. 01E-54 BM | SERP1      |
| 5. 15E-59 | -1. 909054882 | 0. 032 | 0. 583 | 1. 73E-54 BM | ENO1       |
| 6. 37E-59 | -1. 854493646 | 0. 055 | 0. 597 | 2. 15E-54 BM | APRT       |
| 8. 38E-59 | -1. 963553918 | 0. 04  | 0. 588 | 2. 82E-54 BM | TRAF3IP3   |
| 9. 23E-59 | -2. 886257041 | 0. 028 | 0. 578 | 3. 11E-54 BM | TRAC       |
| 1. 52E-58 | -1. 434711121 | 0. 605 | 0. 798 | 5. 12E-54 BM | CCNI       |
| 4. 20E-58 | -1. 888792255 | 0. 047 | 0. 585 | 1. 42E-53 BM | ARL6IP5    |
| 3. 28E-57 | -2. 156418366 | 0. 04  | 0. 575 | 1. 11E-52 BM | CLIC1      |
| 7. 03E-57 | -1. 930062082 | 0. 012 | 0. 559 | 2. 37E-52 BM | TIPIN      |
| 2. 68E-56 | -1. 873239359 | 0. 008 | 0. 553 | 9. 04E-52 BM | SLC25A3    |
| 2. 79E-56 | -1. 849000467 | 0. 047 | 0. 574 | 9. 39E-52 BM | SON        |
| 3. 75E-56 | -1. 434190328 | 0. 557 | 0. 799 | 1. 26E-51 BM | OST4       |
| 3. 87E-56 | -1. 91682277  | 0. 047 | 0. 576 | 1. 30E-51 BM | ARPC5      |
| 6. 97E-56 | -1. 844579749 | 0. 059 | 0. 583 | 2. 35E-51 BM | PSMA7      |
| 1. 14E-55 | -2. 272475388 | 0. 055 | 0. 576 | 3. 82E-51 BM | ITGB2      |
| 1. 42E-55 | -2. 014703137 | 0. 043 | 0. 568 | 4. 77E-51 BM | FYB        |
| 5. 05E-55 | -1. 845227832 | 0. 032 | 0. 559 | 1. 70E-50 BM | HNRNPDL    |
| 5. 87E-55 | -1. 811664271 | 0. 016 | 0. 55  | 1. 98E-50 BM | UXT        |
| 2. 94E-54 | -1. 985516893 | 0. 012 | 0. 543 | 9. 90E-50 BM | GIMAP4     |
| 3. 56E-54 | -1. 900611772 | 0. 024 | 0. 549 | 1. 20E-49 BM | VAMP8      |

|           |               |        |        |              |          |
|-----------|---------------|--------|--------|--------------|----------|
| 1. 08E-53 | -3. 897294397 | 0. 174 | 0. 617 | 3. 65E-49 BM | CD74     |
| 3. 41E-53 | -1. 851286086 | 0. 051 | 0. 559 | 1. 15E-48 BM | SEPT7    |
| 4. 58E-53 | -1. 737122083 | 0. 02  | 0. 544 | 1. 54E-48 BM | RAN      |
| 1. 22E-52 | -1. 774014885 | 0. 032 | 0. 547 | 4. 11E-48 BM | ARL6IP4  |
| 2. 35E-52 | -2. 430630078 | 0. 04  | 0. 546 | 7. 91E-48 BM | CD3D     |
| 2. 51E-52 | -1. 776324745 | 0. 055 | 0. 555 | 8. 47E-48 BM | SMDT1    |
| 3. 94E-52 | -1. 889738338 | 0. 02  | 0. 535 | 1. 33E-47 BM | CLEC2D   |
| 5. 03E-52 | -1. 770692745 | 0. 02  | 0. 534 | 1. 69E-47 BM | TMEM258  |
| 6. 23E-52 | -1. 839301744 | 0. 028 | 0. 537 | 2. 10E-47 BM | CD53     |
| 6. 36E-52 | -1. 758401278 | 0. 047 | 0. 551 | 2. 14E-47 BM | CAPZB    |
| 1. 37E-51 | -1. 746083136 | 0. 036 | 0. 541 | 4. 61E-47 BM | NDUFS5   |
| 1. 47E-51 | -2. 656881199 | 0. 055 | 0. 55  | 4. 97E-47 BM | S100A11  |
| 1. 65E-51 | -2. 657831189 | 0. 083 | 0. 564 | 5. 56E-47 BM | NEAT1    |
| 2. 04E-51 | -2. 125563678 | 0. 024 | 0. 532 | 6. 86E-47 BM | ANXA1    |
| 3. 52E-51 | -1. 717226484 | 0. 091 | 0. 572 | 1. 19E-46 BM | ANAPC16  |
| 5. 98E-51 | -1. 768410188 | 0. 016 | 0. 528 | 2. 02E-46 BM | MIF      |
| 6. 20E-51 | -1. 762343592 | 0. 02  | 0. 532 | 2. 09E-46 BM | HMGN1    |
| 1. 49E-50 | -1. 769388595 | 0. 02  | 0. 524 | 5. 03E-46 BM | RBM39    |
| 3. 25E-50 | -1. 818484719 | 0. 043 | 0. 538 | 1. 10E-45 BM | C6orf48  |
| 3. 26E-50 | -1. 828161557 | 0. 012 | 0. 517 | 1. 10E-45 BM | EVI2B    |
| 4. 36E-50 | -1. 816298378 | 0. 047 | 0. 537 | 1. 47E-45 BM | PSMB9    |
| 4. 59E-50 | -1. 687876824 | 0. 016 | 0. 521 | 1. 55E-45 BM | SPCS1    |
| 3. 46E-49 | -1. 776666737 | 0. 032 | 0. 522 | 1. 17E-44 BM | COX8A    |
| 4. 60E-49 | -1. 732410081 | 0. 051 | 0. 533 | 1. 55E-44 BM | HIGD2A   |
| 9. 38E-49 | -1. 708383818 | 0. 055 | 0. 533 | 3. 16E-44 BM | HNRNPC   |
| 1. 36E-48 | -1. 769935267 | 0. 091 | 0. 558 | 4. 57E-44 BM | RHOA     |
| 1. 51E-48 | -1. 714400321 | 0. 016 | 0. 51  | 5. 08E-44 BM | VAMP2    |
| 1. 64E-48 | -1. 216470477 | 0. 877 | 0. 887 | 5. 52E-44 BM | MYL6     |
| 2. 34E-48 | -1. 733022366 | 0. 028 | 0. 515 | 7. 90E-44 BM | H2AFZ    |
| 2. 43E-48 | -1. 666335275 | 0. 032 | 0. 517 | 8. 18E-44 BM | RSL24D1  |
| 2. 52E-48 | -1. 691210874 | 0. 043 | 0. 525 | 8. 49E-44 BM | ATP50    |
| 2. 58E-48 | -1. 897221182 | 0. 016 | 0. 508 | 8. 70E-44 BM | RARRES3  |
| 4. 10E-48 | -2. 105130139 | 0. 032 | 0. 518 | 1. 38E-43 BM | PLAC8    |
| 5. 47E-48 | -1. 738089776 | 0. 036 | 0. 517 | 1. 84E-43 BM | NDUFB2   |
| 1. 02E-47 | -1. 747805668 | 0. 028 | 0. 511 | 3. 44E-43 BM | CAP1     |
| 1. 04E-47 | -1. 736077662 | 0. 071 | 0. 536 | 3. 52E-43 BM | TPM3     |
| 1. 12E-47 | -1. 791507789 | 0. 024 | 0. 511 | 3. 79E-43 BM | AES      |
| 1. 13E-47 | -1. 670933089 | 0. 099 | 0. 553 | 3. 82E-43 BM | TMBIM6   |
| 1. 22E-47 | -1. 668322586 | 0. 02  | 0. 505 | 4. 12E-43 BM | CUTA     |
| 1. 84E-47 | -1. 63987852  | 0. 036 | 0. 52  | 6. 21E-43 BM | NDUFB11  |
| 2. 45E-47 | -1. 658921828 | 0. 296 | 0. 652 | 8. 24E-43 BM | CDC42    |
| 3. 52E-47 | -1. 561210793 | 0. 285 | 0. 636 | 1. 18E-42 BM | HNRNPK   |
| 1. 06E-46 | -1. 602577905 | 0. 154 | 0. 574 | 3. 57E-42 BM | MORF4L1  |
| 1. 12E-46 | -1. 618892665 | 0. 107 | 0. 552 | 3. 77E-42 BM | USMG5    |
| 1. 18E-46 | -1. 633092684 | 0. 032 | 0. 508 | 3. 96E-42 BM | C19orf53 |
| 1. 41E-46 | -1. 684099189 | 0. 043 | 0. 514 | 4. 74E-42 BM | PRR13    |
| 1. 87E-46 | -1. 655664399 | 0. 036 | 0. 508 | 6. 29E-42 BM | STK4     |
| 2. 19E-46 | -1. 746047164 | 0. 036 | 0. 507 | 7. 38E-42 BM | ACAP1    |
| 2. 49E-46 | -1. 668100826 | 0. 047 | 0. 513 | 8. 39E-42 BM | RBM3     |
| 4. 51E-46 | -1. 670923188 | 0. 043 | 0. 511 | 1. 52E-41 BM | NACA2    |
| 6. 75E-46 | -1. 624703107 | 0. 055 | 0. 517 | 2. 27E-41 BM | C4orf3   |

|          |              |       |       |             |          |
|----------|--------------|-------|-------|-------------|----------|
| 6.82E-46 | -2.120608465 | 0.02  | 0.495 | 2.30E-41 BM | CXCR4    |
| 7.69E-46 | -1.677581976 | 0.036 | 0.503 | 2.59E-41 BM | HMG2     |
| 9.40E-46 | -1.708470375 | 0.04  | 0.505 | 3.17E-41 BM | PPP1CA   |
| 1.04E-45 | -1.59654198  | 0.063 | 0.522 | 3.50E-41 BM | UBXN1    |
| 1.05E-45 | -1.592440691 | 0.134 | 0.563 | 3.55E-41 BM | BRK1     |
| 2.79E-45 | -1.652888204 | 0.043 | 0.504 | 9.42E-41 BM | SEC61G   |
| 3.13E-45 | -1.615816137 | 0.221 | 0.604 | 1.05E-40 BM | HSP90AB1 |
| 3.48E-45 | -1.791968067 | 0.067 | 0.52  | 1.17E-40 BM | TSC22D3  |
| 3.99E-45 | -2.217840374 | 0.055 | 0.511 | 1.35E-40 BM | TRBC2    |
| 6.42E-45 | -1.612220574 | 0.15  | 0.56  | 2.16E-40 BM | COX6A1   |
| 7.75E-45 | -1.492632319 | 0.336 | 0.648 | 2.61E-40 BM | UBL5     |
| 7.81E-45 | -1.767554023 | 0.067 | 0.517 | 2.63E-40 BM | LAMTOR4  |
| 9.53E-45 | -1.965665808 | 0.032 | 0.494 | 3.21E-40 BM | CD3E     |
| 1.09E-44 | -1.606568652 | 0.004 | 0.474 | 3.66E-40 BM | TBCA     |
| 1.48E-44 | -1.714240765 | 0.032 | 0.491 | 5.00E-40 BM | PPIB     |
| 3.67E-44 | -1.683929817 | 0.04  | 0.497 | 1.24E-39 BM | CD44     |
| 4.02E-44 | -1.712737086 | 0.012 | 0.475 | 1.35E-39 BM | PSME2    |
| 5.60E-44 | -1.62509504  | 0.047 | 0.5   | 1.89E-39 BM | SRSF3    |
| 1.33E-43 | -1.589411041 | 0.024 | 0.48  | 4.48E-39 BM | ICAM3    |
| 1.38E-43 | -1.660710552 | 0.012 | 0.472 | 4.65E-39 BM | LRRFIP1  |
| 1.55E-43 | -1.639312394 | 0.055 | 0.501 | 5.21E-39 BM | GSTK1    |
| 2.13E-43 | -1.858614555 | 0.04  | 0.49  | 7.18E-39 BM | SELL     |
| 2.53E-43 | -1.578767201 | 0.036 | 0.488 | 8.53E-39 BM | EIF3M    |
| 4.07E-43 | -1.687537179 | 0.075 | 0.511 | 1.37E-38 BM | POLR2L   |
| 4.13E-43 | -1.592095721 | 0.063 | 0.503 | 1.39E-38 BM | PARK7    |
| 4.96E-43 | -1.624055323 | 0.024 | 0.476 | 1.67E-38 BM | FUS      |
| 5.19E-43 | -1.655354215 | 0.036 | 0.483 | 1.75E-38 BM | SEC61B   |
| 5.46E-43 | -1.395287801 | 0.407 | 0.68  | 1.84E-38 BM | UQCR11   |
| 5.81E-43 | -1.566513338 | 0.04  | 0.487 | 1.96E-38 BM | TRMT112  |
| 7.54E-43 | -2.185880504 | 0.024 | 0.476 | 2.54E-38 BM | CD7      |
| 8.46E-43 | -1.733468304 | 0.024 | 0.475 | 2.85E-38 BM | IL2RG    |
| 1.00E-42 | -1.54616464  | 0.091 | 0.523 | 3.37E-38 BM | UQCR10   |
| 1.58E-42 | -1.611994481 | 0.075 | 0.506 | 5.31E-38 BM | YWHAZ    |
| 1.84E-42 | -1.603644759 | 0.032 | 0.477 | 6.21E-38 BM | RPS27L   |
| 2.08E-42 | -1.562495466 | 0.024 | 0.472 | 7.01E-38 BM | EIF3D    |
| 2.15E-42 | -1.62332619  | 0.024 | 0.472 | 7.25E-38 BM | POLR2J3  |
| 2.39E-42 | -1.580172678 | 0.055 | 0.494 | 8.07E-38 BM | DAZAP2   |
| 7.52E-42 | -1.554903733 | 0.024 | 0.468 | 2.53E-37 BM | ATP5G3   |
| 8.59E-42 | -1.650475858 | 0.012 | 0.459 | 2.89E-37 BM | DBI      |
| 1.36E-41 | -2.04423487  | 0.095 | 0.51  | 4.59E-37 BM | TSPO     |
| 1.57E-41 | -1.658789402 | 0.059 | 0.489 | 5.30E-37 BM | TPI1     |
| 1.86E-41 | -1.529432331 | 0.028 | 0.469 | 6.26E-37 BM | EIF4B    |
| 3.35E-41 | -1.537089749 | 0.091 | 0.507 | 1.13E-36 BM | NEDD8    |
| 3.58E-41 | -1.605858149 | 0.012 | 0.456 | 1.21E-36 BM | SLC25A5  |
| 3.73E-41 | -1.730238491 | 0.02  | 0.46  | 1.26E-36 BM | LCK      |
| 4.41E-41 | -1.538086919 | 0.028 | 0.465 | 1.49E-36 BM | HNRNPF   |
| 4.56E-41 | -1.534027114 | 0.012 | 0.453 | 1.54E-36 BM | ABRACL   |
| 6.39E-41 | -1.517030695 | 0.063 | 0.492 | 2.15E-36 BM | MZT2B    |
| 6.45E-41 | -1.498642715 | 0.028 | 0.464 | 2.17E-36 BM | PSMB1    |
| 2.10E-40 | -2.094741616 | 0.067 | 0.487 | 7.09E-36 BM | GSTP1    |
| 2.27E-40 | -2.309720074 | 0.016 | 0.452 | 7.66E-36 BM | IL7R     |

|          |              |       |       |             |          |
|----------|--------------|-------|-------|-------------|----------|
| 2.28E-40 | -1.511991738 | 0.028 | 0.46  | 7.69E-36 BM | ATP5A1   |
| 2.88E-40 | -1.544155338 | 0.107 | 0.512 | 9.71E-36 BM | ACTR3    |
| 3.05E-40 | -1.469798439 | 0.012 | 0.447 | 1.03E-35 BM | ERH      |
| 4.17E-40 | -1.271415857 | 0.692 | 0.783 | 1.41E-35 BM | MTRNR2L8 |
| 5.95E-40 | -1.497529967 | 0     | 0.436 | 2.00E-35 BM | SF1      |
| 6.34E-40 | -1.485116293 | 0.146 | 0.534 | 2.13E-35 BM | CNBP     |
| 6.48E-40 | -1.634672486 | 0.02  | 0.451 | 2.18E-35 BM | LITAF    |
| 7.38E-40 | -1.551519555 | 0.024 | 0.455 | 2.49E-35 BM | NCL      |
| 2.11E-39 | -1.483267788 | 0.134 | 0.52  | 7.11E-35 BM | NDUFA1   |
| 2.15E-39 | -1.471240129 | 0.016 | 0.444 | 7.24E-35 BM | SNRPG    |
| 2.31E-39 | -1.503715007 | 0.036 | 0.459 | 7.78E-35 BM | NSA2     |
| 2.61E-39 | -1.499539409 | 0     | 0.431 | 8.79E-35 BM | MTDH     |
| 4.39E-39 | -1.526422403 | 0.043 | 0.464 | 1.48E-34 BM | C9orf16  |
| 7.87E-39 | -1.492327482 | 0.043 | 0.46  | 2.65E-34 BM | PGK1     |
| 9.24E-39 | -1.469496692 | 0.051 | 0.466 | 3.11E-34 BM | UBE2D2   |
| 1.10E-38 | -1.612663026 | 0.051 | 0.469 | 3.72E-34 BM | BIN2     |
| 1.20E-38 | -1.525985447 | 0.024 | 0.444 | 4.06E-34 BM | FAM65B   |
| 2.12E-38 | -1.741350228 | 0.067 | 0.477 | 7.15E-34 BM | NOSIP    |
| 2.56E-38 | -1.519782827 | 0.043 | 0.459 | 8.61E-34 BM | UQCRQ    |
| 3.71E-38 | -1.42605721  | 0.032 | 0.451 | 1.25E-33 BM | SPCS2    |
| 3.89E-38 | -1.509238911 | 0.02  | 0.441 | 1.31E-33 BM | TMEM123  |
| 4.16E-38 | -1.453604695 | 0.024 | 0.441 | 1.40E-33 BM | SYF2     |
| 4.48E-38 | -1.609301296 | 0.016 | 0.436 | 1.51E-33 BM | PRELID1  |
| 6.15E-38 | -1.457857845 | 0.016 | 0.434 | 2.07E-33 BM | C11orf31 |
| 2.09E-37 | -1.466565237 | 0.04  | 0.447 | 7.06E-33 BM | ATPIF1   |
| 2.73E-37 | -1.4267137   | 0.024 | 0.434 | 9.18E-33 BM | HNRNPA0  |
| 4.66E-37 | -1.540705375 | 0.047 | 0.449 | 1.57E-32 BM | CSTB     |
| 5.78E-37 | -1.599600306 | 0.024 | 0.436 | 1.95E-32 BM | LY6E     |
| 7.30E-37 | -1.444815276 | 0.028 | 0.435 | 2.46E-32 BM | NDUFB9   |
| 7.58E-37 | -1.536703849 | 0.036 | 0.44  | 2.56E-32 BM | FOXP1    |
| 2.19E-36 | -1.398580758 | 0.012 | 0.42  | 7.39E-32 BM | MINOS1   |
| 2.57E-36 | -1.456691942 | 0.099 | 0.48  | 8.66E-32 BM | EID1     |
| 3.30E-36 | -1.33921621  | 0.352 | 0.611 | 1.11E-31 BM | PCBP2    |
| 4.77E-36 | -1.440154989 | 0.024 | 0.424 | 1.61E-31 BM | HNRNPA3  |
| 5.75E-36 | -1.732799351 | 0.016 | 0.418 | 1.94E-31 BM | CD2      |
| 8.41E-36 | -1.397101578 | 0.024 | 0.423 | 2.83E-31 BM | SNRPE    |
| 8.64E-36 | -1.424792876 | 0.059 | 0.45  | 2.91E-31 BM | GTF3A    |
| 8.79E-36 | -1.483531344 | 0.012 | 0.413 | 2.96E-31 BM | SET      |
| 3.36E-35 | -1.514319661 | 0.032 | 0.424 | 1.13E-30 BM | C12orf57 |
| 3.37E-35 | -1.440443594 | 0.008 | 0.405 | 1.13E-30 BM | ANKRD12  |
| 4.21E-35 | -1.449469379 | 0.016 | 0.413 | 1.42E-30 BM | TCF25    |
| 4.55E-35 | -1.466072408 | 0.079 | 0.461 | 1.53E-30 BM | PCBP1    |
| 5.44E-35 | -1.421074203 | 0.043 | 0.432 | 1.83E-30 BM | PSMB8    |
| 5.60E-35 | -2.528521029 | 0.043 | 0.43  | 1.89E-30 BM | HLA-DPB1 |
| 7.17E-35 | -1.377668535 | 0.079 | 0.462 | 2.42E-30 BM | SERBP1   |
| 1.05E-34 | -1.432859595 | 0.008 | 0.401 | 3.53E-30 BM | SEPT6    |
| 1.79E-34 | -1.511839782 | 0.012 | 0.402 | 6.02E-30 BM | JAK1     |
| 1.90E-34 | -1.441656202 | 0.04  | 0.425 | 6.39E-30 BM | NDUFB7   |
| 2.02E-34 | -1.390526952 | 0.047 | 0.43  | 6.79E-30 BM | MYEOV2   |
| 2.21E-34 | -1.452321056 | 0.024 | 0.413 | 7.45E-30 BM | PCSK7    |
| 2.99E-34 | -1.372639904 | 0.051 | 0.431 | 1.01E-29 BM | SNU13    |

|           |               |        |        |              |           |
|-----------|---------------|--------|--------|--------------|-----------|
| 3. 23E-34 | -1. 436928297 | 0. 024 | 0. 411 | 1. 09E-29 BM | FAM49B    |
| 3. 28E-34 | -1. 348751191 | 0. 02  | 0. 407 | 1. 11E-29 BM | C14orf166 |
| 3. 37E-34 | -2. 373128832 | 0. 051 | 0. 43  | 1. 14E-29 BM | CTSS      |
| 4. 70E-34 | -1. 502173203 | 0. 028 | 0. 413 | 1. 58E-29 BM | FKBP1A    |
| 4. 72E-34 | -1. 394457782 | 0. 04  | 0. 422 | 1. 59E-29 BM | LDHA      |
| 4. 92E-34 | -1. 344224413 | 0. 067 | 0. 446 | 1. 66E-29 BM | ATP5J     |
| 6. 29E-34 | -1. 541813193 | 0      | 0. 388 | 2. 12E-29 BM | CRIP1     |
| 6. 78E-34 | -1. 383623625 | 0. 016 | 0. 401 | 2. 28E-29 BM | LUC7L3    |
| 6. 95E-34 | -1. 500080249 | 0. 032 | 0. 417 | 2. 34E-29 BM | LCP1      |
| 1. 06E-33 | -1. 431192006 | 0. 028 | 0. 411 | 3. 58E-29 BM | RNASSET2  |
| 1. 34E-33 | -1. 611072555 | 0. 004 | 0. 388 | 4. 53E-29 BM | CD3G      |
| 1. 46E-33 | -1. 397175186 | 0. 012 | 0. 395 | 4. 91E-29 BM | ACTR2     |
| 1. 57E-33 | -1. 578680435 | 0. 02  | 0. 402 | 5. 29E-29 BM | JUNB      |
| 1. 76E-33 | -1. 416197648 | 0. 024 | 0. 404 | 5. 93E-29 BM | NOP10     |
| 1. 84E-33 | -1. 301118287 | 0. 182 | 0. 519 | 6. 21E-29 BM | SAP18     |
| 3. 31E-33 | -1. 54720225  | 0. 075 | 0. 449 | 1. 11E-28 BM | CD99      |
| 4. 31E-33 | -1. 359201804 | 0. 016 | 0. 395 | 1. 45E-28 BM | KMT2E     |
| 4. 59E-33 | -1. 40066787  | 0. 016 | 0. 396 | 1. 55E-28 BM | HLA-F     |
| 5. 30E-33 | -1. 410493822 | 0. 067 | 0. 438 | 1. 79E-28 BM | PKM       |
| 5. 95E-33 | -1. 321733811 | 0. 012 | 0. 391 | 2. 01E-28 BM | RSL1D1    |
| 8. 45E-33 | -1. 345819465 | 0. 095 | 0. 454 | 2. 85E-28 BM | C11orf58  |
| 9. 15E-33 | -1. 349087293 | 0. 024 | 0. 399 | 3. 08E-28 BM | PEBP1     |
| 1. 07E-32 | -1. 556284808 | 0. 02  | 0. 395 | 3. 61E-28 BM | ZFP36L2   |
| 1. 08E-32 | -1. 342107315 | 0. 071 | 0. 433 | 3. 63E-28 BM | COX7A2L   |
| 1. 21E-32 | -1. 342266651 | 0. 024 | 0. 398 | 4. 07E-28 BM | LSM7      |
| 1. 28E-32 | -1. 47172179  | 0. 079 | 0. 442 | 4. 31E-28 BM | PNRC1     |
| 1. 32E-32 | -1. 374179537 | 0. 091 | 0. 446 | 4. 44E-28 BM | NDUFA11   |
| 1. 51E-32 | -1. 33938382  | 0. 024 | 0. 396 | 5. 08E-28 BM | SRSF2     |
| 1. 58E-32 | -1. 38515714  | 0. 028 | 0. 402 | 5. 31E-28 BM | ATP5I     |
| 1. 79E-32 | -1. 383376987 | 0. 008 | 0. 383 | 6. 02E-28 BM | RCS1D1    |
| 2. 01E-32 | -1. 350624915 | 0. 02  | 0. 392 | 6. 79E-28 BM | SRRM1     |
| 2. 10E-32 | -1. 373409241 | 0. 024 | 0. 396 | 7. 09E-28 BM | TUBB      |
| 2. 34E-32 | -1. 34047257  | 0. 02  | 0. 392 | 7. 88E-28 BM | PRRC2C    |
| 2. 48E-32 | -1. 314698079 | 0. 012 | 0. 385 | 8. 35E-28 BM |           |
| 2. 67E-32 | -1. 459988207 | 0. 008 | 0. 383 | 9. 01E-28 BM | PPP2R5C   |
| 3. 44E-32 | -1. 648655957 | 0. 016 | 0. 387 | 1. 16E-27 BM | MYO1F     |
| 3. 65E-32 | -1. 280510066 | 0. 004 | 0. 376 | 1. 23E-27 BM | SNRPF     |
| 3. 85E-32 | -1. 379288003 | 0. 071 | 0. 434 | 1. 30E-27 BM | TRAPPC1   |
| 4. 36E-32 | -1. 314761074 | 0. 024 | 0. 393 | 1. 47E-27 BM | FBL       |
| 8. 15E-32 | -1. 295954166 | 0. 024 | 0. 39  | 2. 75E-27 BM | ATP5H     |
| 1. 03E-31 | -2. 211028029 | 0. 04  | 0. 405 | 3. 47E-27 BM | TRBC1     |
| 1. 06E-31 | -1. 396525872 | 0. 032 | 0. 396 | 3. 57E-27 BM | MSN       |
| 1. 09E-31 | -1. 318984825 | 0. 008 | 0. 377 | 3. 67E-27 BM | CYTIP     |
| 1. 51E-31 | -1. 31721418  | 0. 012 | 0. 381 | 5. 09E-27 BM | RSRP1     |
| 1. 70E-31 | -1. 399707068 | 0. 012 | 0. 378 | 5. 73E-27 BM | ANXA6     |
| 1. 79E-31 | -1. 283473894 | 0. 032 | 0. 395 | 6. 04E-27 BM | TOMM20    |
| 1. 83E-31 | -1. 309223122 | 0. 008 | 0. 374 | 6. 16E-27 BM | SNRPB2    |
| 1. 98E-31 | -1. 342656803 | 0. 079 | 0. 432 | 6. 65E-27 BM | COPE      |
| 2. 27E-31 | -1. 511565025 | 0. 024 | 0. 388 | 7. 64E-27 BM | C1orf162  |
| 2. 78E-31 | -1. 601566787 | 0. 016 | 0. 38  | 9. 38E-27 BM | ANXA2     |
| 2. 90E-31 | -1. 307424291 | 0. 008 | 0. 372 | 9. 76E-27 BM | SNHG8     |

15-Sep

|           |               |        |        |              |           |
|-----------|---------------|--------|--------|--------------|-----------|
| 3. 15E-31 | -1. 303857958 | 0. 036 | 0. 396 | 1. 06E-26 BM | ATP5F1    |
| 3. 28E-31 | -1. 31759511  | 0. 012 | 0. 375 | 1. 11E-26 BM | EIF2S3    |
| 3. 71E-31 | -1. 453545757 | 0. 209 | 0. 51  | 1. 25E-26 BM | UCP2      |
| 4. 17E-31 | -1. 303092306 | 0. 119 | 0. 458 | 1. 41E-26 BM | JTB       |
| 4. 21E-31 | -1. 316327579 | 0. 008 | 0. 372 | 1. 42E-26 BM | DDX24     |
| 5. 22E-31 | -1. 366369593 | 0. 028 | 0. 387 | 1. 76E-26 BM | SEC11A    |
| 6. 27E-31 | -1. 301239484 | 0. 008 | 0. 369 | 2. 11E-26 BM | COX5A     |
| 6. 55E-31 | -1. 303127822 | 0. 016 | 0. 376 | 2. 21E-26 BM | SNRNP     |
| 6. 98E-31 | -1. 311353179 | 0. 02  | 0. 379 | 2. 35E-26 BM | HNRNPU    |
| 7. 70E-31 | -1. 27918609  | 0. 012 | 0. 372 | 2. 59E-26 BM | XRCC5     |
| 1. 11E-30 | -1. 434237483 | 0. 008 | 0. 367 | 3. 75E-26 BM | IRF1      |
| 1. 48E-30 | -1. 405811817 | 0. 043 | 0. 402 | 4. 98E-26 BM | TUBA1B    |
| 1. 49E-30 | -1. 22756156  | 0. 051 | 0. 409 | 5. 02E-26 BM | NDUFB4    |
| 1. 78E-30 | -1. 369103524 | 0. 079 | 0. 424 | 6. 01E-26 BM | ARPC4     |
| 1. 85E-30 | -1. 321579197 | 0. 008 | 0. 365 | 6. 22E-26 BM | ATM       |
| 1. 85E-30 | -1. 326128497 | 0. 206 | 0. 504 | 6. 22E-26 BM | COX7B     |
| 2. 19E-30 | -1. 326884906 | 0. 032 | 0. 389 | 7. 37E-26 BM | GNG5      |
| 2. 21E-30 | -1. 306722215 | 0. 012 | 0. 368 | 7. 46E-26 BM | CDC42SE2  |
| 2. 76E-30 | -1. 286070056 | 0. 024 | 0. 378 | 9. 29E-26 BM | HNRNPM    |
| 2. 78E-30 | -1. 556696024 | 0. 004 | 0. 36  | 9. 35E-26 BM | CD63      |
| 3. 06E-30 | -1. 303035042 | 0. 024 | 0. 379 | 1. 03E-25 BM | DDX17     |
| 3. 13E-30 | -1. 316715314 | 0. 02  | 0. 374 | 1. 05E-25 BM | PSMA4     |
| 3. 30E-30 | -1. 319585099 | 0. 012 | 0. 366 | 1. 11E-25 BM | ARGLU1    |
| 3. 75E-30 | -1. 303952559 | 0. 024 | 0. 378 | 1. 26E-25 BM | ARF6      |
| 4. 01E-30 | -1. 304450365 | 0. 012 | 0. 366 | 1. 35E-25 BM | CELF2     |
| 4. 16E-30 | -1. 370132016 | 0. 02  | 0. 373 | 1. 40E-25 BM | GLRX      |
| 4. 72E-30 | -1. 305183364 | 0. 02  | 0. 372 | 1. 59E-25 BM | S1PR4     |
| 5. 34E-30 | -1. 285518948 | 0. 036 | 0. 389 | 1. 80E-25 BM | EIF4G2    |
| 7. 84E-30 | -1. 257630355 | 0. 024 | 0. 375 | 2. 64E-25 BM | SRP9      |
| 9. 89E-30 | -1. 173623931 | 0. 063 | 0. 412 | 3. 33E-25 BM | NDUFB8    |
| 1. 00E-29 | -1. 323682616 | 0. 016 | 0. 366 | 3. 37E-25 BM | TNRC6B    |
| 1. 19E-29 | -1. 272294405 | 0. 036 | 0. 386 | 4. 00E-25 BM | PSMB3     |
| 1. 20E-29 | -1. 348265259 | 0. 079 | 0. 42  | 4. 03E-25 BM | NDUFB1    |
| 1. 23E-29 | -1. 270625443 | 0. 087 | 0. 427 | 4. 15E-25 BM | DAD1      |
| 1. 33E-29 | -1. 233198291 | 0. 016 | 0. 365 | 4. 48E-25 BM | UBE2I     |
| 1. 33E-29 | -1. 274192051 | 0. 008 | 0. 358 | 4. 48E-25 BM | MPHOSPH8  |
| 1. 36E-29 | -1. 348962059 | 0. 047 | 0. 391 | 4. 57E-25 BM | LEPROTL1  |
| 1. 43E-29 | -1. 274519796 | 0. 04  | 0. 385 | 4. 81E-25 BM | SF3B5     |
| 2. 03E-29 | -1. 249269209 | 0. 012 | 0. 36  | 6. 85E-25 BM | CIB1      |
| 2. 25E-29 | -1. 356189602 | 0. 051 | 0. 397 | 7. 57E-25 BM | CCND3     |
| 2. 27E-29 | -1. 227100179 | 0. 02  | 0. 366 | 7. 63E-25 BM | SSBP1     |
| 2. 29E-29 | -1. 305372756 | 0. 012 | 0. 359 | 7. 71E-25 BM | RHOG      |
| 2. 42E-29 | -1. 291699927 | 0. 032 | 0. 376 | 8. 14E-25 BM | RABAC1    |
| 3. 09E-29 | -1. 237272343 | 0. 036 | 0. 382 | 1. 04E-24 BM | NDUFB10   |
| 3. 14E-29 | -1. 234179668 | 0. 008 | 0. 354 | 1. 06E-24 BM | LINC00493 |
| 3. 39E-29 | -1. 261362488 | 0. 012 | 0. 359 | 1. 14E-24 BM | TNFAIP8   |
| 3. 41E-29 | -1. 219362897 | 0. 245 | 0. 558 | 1. 15E-24 BM | GPX4      |
| 3. 49E-29 | -1. 307411945 | 0. 004 | 0. 35  | 1. 18E-24 BM | PLP2      |
| 3. 70E-29 | -1. 279631802 | 0. 02  | 0. 364 | 1. 25E-24 BM | CAPZA1    |
| 5. 17E-29 | -1. 331139441 | 0. 016 | 0. 359 | 1. 74E-24 BM | IFI16     |
| 8. 45E-29 | -1. 248531936 | 0. 008 | 0. 35  | 2. 85E-24 BM | PRPF38B   |



|           |               |        |        |              |          |
|-----------|---------------|--------|--------|--------------|----------|
| 1. 29E-28 | -1. 276394637 | 0. 016 | 0. 356 | 4. 35E-24 BM | GIMAP1   |
| 1. 37E-28 | -1. 280542156 | 0. 016 | 0. 356 | 4. 61E-24 BM | OSTF1    |
| 1. 43E-28 | -1. 804285779 | 0. 02  | 0. 359 | 4. 80E-24 BM | ID2      |
| 1. 61E-28 | -1. 284408386 | 0. 016 | 0. 355 | 5. 43E-24 BM | TSTD1    |
| 1. 65E-28 | -1. 257131809 | 0. 016 | 0. 355 | 5. 57E-24 BM | EVI2A    |
| 1. 91E-28 | -1. 38920774  | 0. 063 | 0. 396 | 6. 45E-24 BM | ISG20    |
| 2. 24E-28 | -1. 269841252 | 0. 04  | 0. 376 | 7. 55E-24 BM | DRAP1    |
| 2. 33E-28 | -1. 203557541 | 0. 016 | 0. 354 | 7. 86E-24 BM | NDUFA12  |
| 2. 61E-28 | -2. 748150563 | 0. 095 | 0. 42  | 8. 79E-24 BM | LGALS1   |
| 3. 09E-28 | -1. 251294974 | 0. 028 | 0. 364 | 1. 04E-23 BM | CCDC85B  |
| 3. 55E-28 | -1. 206058821 | 0. 02  | 0. 356 | 1. 20E-23 BM | SHFM1    |
| 4. 38E-28 | -1. 291590011 | 0. 071 | 0. 407 | 1. 48E-23 BM | POMP     |
| 4. 57E-28 | -1. 214453019 | 0. 028 | 0. 362 | 1. 54E-23 BM | PSMA1    |
| 5. 61E-28 | -1. 284614591 | 0. 02  | 0. 354 | 1. 89E-23 BM | PDIA3    |
| 5. 91E-28 | -1. 273573329 | 0. 012 | 0. 348 | 1. 99E-23 BM | RNF213   |
| 5. 93E-28 | -1. 209722176 | 0. 012 | 0. 346 | 2. 00E-23 BM | DDX18    |
| 8. 45E-28 | -1. 21196378  | 0. 024 | 0. 356 | 2. 85E-23 BM | MRPS21   |
| 1. 10E-27 | -1. 224917073 | 0. 024 | 0. 355 | 3. 71E-23 BM | SRSF7    |
| 1. 12E-27 | -1. 19817208  | 0. 028 | 0. 361 | 3. 76E-23 BM | HSPE1    |
| 1. 18E-27 | -1. 223504751 | 0. 032 | 0. 362 | 3. 96E-23 BM | SEPT9    |
| 1. 27E-27 | -1. 202985506 | 0. 02  | 0. 351 | 4. 29E-23 BM | ANXA11   |
| 1. 32E-27 | -1. 125914905 | 0. 557 | 0. 677 | 4. 44E-23 BM | YBX1     |
| 1. 44E-27 | -1. 239535463 | 0. 028 | 0. 358 | 4. 84E-23 BM | SCAND1   |
| 1. 57E-27 | -1. 214135014 | 0. 012 | 0. 342 | 5. 29E-23 BM | ELF1     |
| 1. 65E-27 | -1. 402670935 | 0. 178 | 0. 484 | 5. 56E-23 BM | TAGLN2   |
| 1. 94E-27 | -1. 199599586 | 0. 024 | 0. 353 | 6. 53E-23 BM | PPP1R2   |
| 1. 94E-27 | -1. 18549959  | 0. 004 | 0. 334 | 6. 54E-23 BM | PPIG     |
| 2. 07E-27 | -1. 19583393  | 0. 024 | 0. 357 | 6. 96E-23 BM | GDI2     |
| 2. 25E-27 | -2. 29640526  | 0. 04  | 0. 367 | 7. 57E-23 BM | HLA-DPA1 |
| 2. 27E-27 | -1. 191512267 | 0. 012 | 0. 341 | 7. 66E-23 BM | NDUFS6   |
| 2. 97E-27 | -1. 169955327 | 0. 028 | 0. 356 | 9. 99E-23 BM | SF3B6    |
| 3. 00E-27 | -1. 179789492 | 0. 008 | 0. 336 | 1. 01E-22 BM | CHMP4A   |
| 3. 12E-27 | -2. 595264891 | 0. 032 | 0. 359 | 1. 05E-22 BM | HLA-DRB1 |
| 4. 08E-27 | -1. 155205361 | 0. 004 | 0. 331 | 1. 37E-22 BM | ZNF706   |
| 4. 13E-27 | -1. 35445691  | 0. 008 | 0. 335 | 1. 39E-22 BM | CARD16   |
| 4. 27E-27 | -1. 276898371 | 0. 008 | 0. 335 | 1. 44E-22 BM | CLEC2B   |
| 5. 16E-27 | -1. 264993694 | 0. 016 | 0. 342 | 1. 74E-22 BM | PRMT2    |
| 7. 49E-27 | -1. 310614182 | 0. 008 | 0. 333 | 2. 52E-22 BM | HNRNPH1  |
| 7. 86E-27 | -1. 262117441 | 0. 047 | 0. 368 | 2. 65E-22 BM | CD164    |
| 7. 90E-27 | -1. 24223357  | 0. 067 | 0. 386 | 2. 66E-22 BM | ATP6V1F  |
| 9. 31E-27 | -1. 430610841 | 0. 008 | 0. 334 | 3. 14E-22 BM | ALOX5AP  |
| 1. 11E-26 | -1. 265924587 | 0. 028 | 0. 349 | 3. 75E-22 BM | TBC1D10C |
| 1. 21E-26 | -1. 187852739 | 0. 012 | 0. 334 | 4. 07E-22 BM | DDX46    |
| 1. 31E-26 | -1. 537169425 | 0. 016 | 0. 34  | 4. 41E-22 BM | IFITM1   |
| 1. 33E-26 | -1. 295303953 | 0. 091 | 0. 405 | 4. 49E-22 BM | BLOC1S1  |
| 1. 35E-26 | -1. 197685161 | 0. 032 | 0. 353 | 4. 56E-22 BM | HCLS1    |
| 1. 55E-26 | -1. 175501922 | 0. 036 | 0. 356 | 5. 23E-22 BM | VAPA     |
| 1. 64E-26 | -1. 144194084 | 0. 012 | 0. 334 | 5. 54E-22 BM | PPA1     |
| 2. 22E-26 | -1. 18845233  | 0. 087 | 0. 397 | 7. 48E-22 BM | SUMO1    |
| 2. 24E-26 | -1. 136434857 | 0. 008 | 0. 328 | 7. 56E-22 BM | NDUFC2   |
| 2. 27E-26 | -1. 144599182 | 0. 02  | 0. 343 | 7. 63E-22 BM | XRCC6    |

|          |              |       |       |             |               |
|----------|--------------|-------|-------|-------------|---------------|
| 2.38E-26 | -2.100083403 | 0.028 | 0.346 | 8.02E-22 BM | CTSW          |
| 2.53E-26 | -1.236799994 | 0.024 | 0.343 | 8.51E-22 BM | CD47          |
| 2.58E-26 | -1.337491892 | 0.071 | 0.385 | 8.71E-22 BM | CALR          |
| 2.82E-26 | -1.224367002 | 0.024 | 0.342 | 9.51E-22 BM | HMG3          |
| 2.84E-26 | -1.156259564 | 0.012 | 0.331 | 9.58E-22 BM | SF3B2         |
| 2.86E-26 | -1.176383132 | 0.036 | 0.353 | 9.63E-22 BM | UBE2L3        |
| 2.94E-26 | -1.14739012  | 0.008 | 0.327 | 9.92E-22 BM | TMED2         |
| 3.33E-26 | -1.161522231 | 0.083 | 0.4   | 1.12E-21 BM | RAP1A         |
| 3.87E-26 | -1.702788645 | 0.024 | 0.342 | 1.30E-21 BM | AP1S2         |
| 4.08E-26 | -1.22950908  | 0.02  | 0.338 | 1.38E-21 BM | RP5-1171I10.5 |
| 4.61E-26 | -1.169011608 | 0.02  | 0.337 | 1.55E-21 BM | FNBP1         |
| 4.65E-26 | -1.17021069  | 0.008 | 0.325 | 1.57E-21 BM | SRSF11        |
| 4.95E-26 | -1.41819732  | 0.008 | 0.325 | 1.67E-21 BM | PYCARD        |
| 6.93E-26 | -1.312517676 | 0.004 | 0.319 | 2.33E-21 BM | XBP1          |
| 9.77E-26 | -1.165975751 | 0.024 | 0.34  | 3.29E-21 BM | PGAM1         |
| 1.04E-25 | -1.581997475 | 0.028 | 0.341 | 3.50E-21 BM | NPC2          |
| 1.16E-25 | -1.281880149 | 0.016 | 0.329 | 3.91E-21 BM | KLF6          |
| 1.16E-25 | -1.214237836 | 0.008 | 0.321 | 3.92E-21 BM | ATP5D         |
| 1.21E-25 | -1.154398317 | 0.016 | 0.331 | 4.07E-21 BM | ADD3          |
| 1.24E-25 | -1.181559734 | 0.008 | 0.321 | 4.18E-21 BM | BIN1          |
| 1.34E-25 | -1.225861159 | 0.016 | 0.329 | 4.53E-21 BM | HSP90B1       |
| 1.64E-25 | -1.191188484 | 0.02  | 0.331 | 5.53E-21 BM | TAPBP         |
| 1.70E-25 | -1.145178304 | 0.028 | 0.339 | 5.73E-21 BM | MZT2A         |
| 1.82E-25 | -1.114610808 | 0.012 | 0.327 | 6.14E-21 BM | SSB           |
| 1.86E-25 | -1.194784406 | 0.051 | 0.362 | 6.25E-21 BM | RWDD1         |
| 2.55E-25 | -1.286613858 | 0.016 | 0.326 | 8.58E-21 BM | IER2          |
| 2.72E-25 | -1.105410573 | 0.02  | 0.333 | 9.16E-21 BM | LSM5          |
| 2.82E-25 | -1.231890433 | 0.02  | 0.329 | 9.50E-21 BM | MCL1          |
| 3.08E-25 | -1.283233527 | 0.008 | 0.318 | 1.04E-20 BM | CD27          |
| 3.09E-25 | -1.540585447 | 0.036 | 0.345 | 1.04E-20 BM | CCR7          |
| 3.11E-25 | -1.157253067 | 0.02  | 0.33  | 1.05E-20 BM | NUCKS1        |
| 3.61E-25 | -1.133239887 | 0.016 | 0.325 | 1.22E-20 BM | PNN           |
| 3.86E-25 | -1.10579162  | 0.004 | 0.312 | 1.30E-20 BM | LSM3          |
| 3.93E-25 | -1.229264732 | 0.012 | 0.32  | 1.32E-20 BM | PIK3IP1       |
| 4.63E-25 | -1.106718195 | 0.02  | 0.327 | 1.56E-20 BM | TUFM          |
| 5.26E-25 | -1.106349022 | 0.036 | 0.344 | 1.77E-20 BM | PYURF         |
| 7.21E-25 | -1.108157915 | 0.012 | 0.318 | 2.43E-20 BM | COX14         |
| 7.52E-25 | -1.118046803 | 0.016 | 0.322 | 2.53E-20 BM | TMBIM4        |
| 7.92E-25 | -1.158371949 | 0.032 | 0.337 | 2.67E-20 BM | SELT          |
| 8.29E-25 | -1.1926354   | 0.024 | 0.329 | 2.79E-20 BM | PGLS          |
| 8.95E-25 | -1.125992475 | 0.02  | 0.328 | 3.01E-20 BM | SCAF11        |
| 9.32E-25 | -1.118657068 | 0.012 | 0.317 | 3.14E-20 BM | TRA2B         |
| 1.19E-24 | -1.153728493 | 0.047 | 0.351 | 4.02E-20 BM | TMEM50A       |
| 1.45E-24 | -1.130690805 | 0     | 0.302 | 4.88E-20 BM | ATXN8OS       |
| 1.57E-24 | -1.111766096 | 0.004 | 0.306 | 5.29E-20 BM | SEPW1         |
| 1.85E-24 | -1.142778373 | 0.016 | 0.319 | 6.24E-20 BM | BST2          |
| 1.95E-24 | -1.117737434 | 0.012 | 0.313 | 6.56E-20 BM | CLTA          |
| 2.03E-24 | -1.146650874 | 0.004 | 0.305 | 6.84E-20 BM | RTN4          |
| 2.27E-24 | -1.131201089 | 0.028 | 0.332 | 7.65E-20 BM | STK17B        |
| 2.29E-24 | -1.215418048 | 0.008 | 0.309 | 7.71E-20 BM | TCF7          |
| 2.37E-24 | -1.143219372 | 0.047 | 0.346 | 7.97E-20 BM | DDT           |

|          |              |       |       |             |            |
|----------|--------------|-------|-------|-------------|------------|
| 2.41E-24 | -1.216093021 | 0.012 | 0.312 | 8.12E-20 BM | LAT        |
| 2.58E-24 | -1.088584584 | 0.012 | 0.312 | 8.68E-20 BM | RAB7A      |
| 2.60E-24 | -1.511286358 | 0.032 | 0.332 | 8.77E-20 BM | CD247      |
| 2.70E-24 | -1.161620668 | 0.079 | 0.374 | 9.08E-20 BM | UFC1       |
| 3.25E-24 | -1.196859415 | 0.028 | 0.329 | 1.10E-19 BM | PPP1R18    |
| 3.75E-24 | -1.081264394 | 0.016 | 0.315 | 1.26E-19 BM | CCT8       |
| 3.95E-24 | -1.212887023 | 0.02  | 0.319 | 1.33E-19 BM | NFKBIA     |
| 4.38E-24 | -1.105441842 | 0.016 | 0.316 | 1.48E-19 BM | CCDC12     |
| 5.03E-24 | -1.106532607 | 0.02  | 0.319 | 1.69E-19 BM | ARHGDI1A   |
| 5.81E-24 | -1.14600346  | 0.004 | 0.3   | 1.96E-19 BM | RHOH       |
| 6.29E-24 | -1.168803318 | 0.261 | 0.49  | 2.12E-19 BM | TMEM59     |
| 6.70E-24 | -1.175960403 | 0.237 | 0.478 | 2.26E-19 BM | ATP5J2     |
| 9.60E-24 | -1.039954703 | 0.004 | 0.298 | 3.23E-19 BM | EIF3I      |
| 9.70E-24 | -1.192653766 | 0.016 | 0.311 | 3.27E-19 BM | CKLF       |
| 9.73E-24 | -1.136205307 | 0.055 | 0.353 | 3.28E-19 BM | HSD17B11   |
| 9.95E-24 | -1.166736221 | 0.012 | 0.307 | 3.35E-19 BM | MYO1G      |
| 1.09E-23 | -1.307223719 | 0.036 | 0.33  | 3.67E-19 BM | CDC42SE1   |
| 1.12E-23 | -1.069623181 | 0.008 | 0.302 | 3.78E-19 BM | H2AFV      |
| 1.22E-23 | -1.081192478 | 0.02  | 0.313 | 4.10E-19 BM | ATP5C1     |
| 1.26E-23 | -1.094516141 | 0.008 | 0.301 | 4.26E-19 BM | DEK        |
| 1.34E-23 | -1.07942132  | 0.004 | 0.297 | 4.52E-19 BM | ANKRD44    |
| 1.41E-23 | -1.072681397 | 0.012 | 0.305 | 4.75E-19 BM | KRT10      |
| 1.43E-23 | -1.179282687 | 0.008 | 0.301 | 4.81E-19 BM | GABPB1-AS1 |
| 1.46E-23 | -1.099779369 | 0.012 | 0.305 | 4.91E-19 BM | RBM25      |
| 1.57E-23 | -1.161451354 | 0.016 | 0.309 | 5.28E-19 BM | PTPN6      |
| 1.65E-23 | -1.056717952 | 0.012 | 0.305 | 5.56E-19 BM | CCDC109B   |
| 1.88E-23 | -1.127984748 | 0.02  | 0.312 | 6.34E-19 BM | ARHGAP15   |
| 1.92E-23 | -1.090972786 | 0.016 | 0.31  | 6.48E-19 BM | ARID4B     |
| 2.37E-23 | -1.048218337 | 0.02  | 0.312 | 7.99E-19 BM | UQCRFS1    |
| 2.52E-23 | -1.104282088 | 0.036 | 0.328 | 8.51E-19 BM | EIF1AX     |
| 2.71E-23 | -1.051719493 | 0.008 | 0.298 | 9.14E-19 BM | CCT3       |
| 3.14E-23 | -1.124726131 | 0.008 | 0.297 | 1.06E-18 BM | CAST       |
| 3.32E-23 | -1.227656934 | 0.02  | 0.309 | 1.12E-18 BM | ZFP36L1    |
| 3.90E-23 | -2.371201296 | 0.028 | 0.316 | 1.31E-18 BM | AIF1       |
| 4.62E-23 | -1.084042388 | 0.016 | 0.304 | 1.56E-18 BM | ZNF207     |
| 4.66E-23 | -1.066980376 | 0.016 | 0.304 | 1.57E-18 BM | LSM8       |
| 4.93E-23 | -1.124870723 | 0.036 | 0.328 | 1.66E-18 BM | C10orf54   |
| 5.45E-23 | -1.858706385 | 0.17  | 0.434 | 1.84E-18 BM | SAT1       |
| 5.66E-23 | -1.108263473 | 0.032 | 0.319 | 1.91E-18 BM | DNAJC8     |
| 6.12E-23 | -1.05872517  | 0.024 | 0.311 | 2.06E-18 BM | AURKAIP1   |
| 6.41E-23 | -1.044763775 | 0.02  | 0.308 | 2.16E-18 BM | RBMX       |
| 7.09E-23 | -1.066037805 | 0     | 0.285 | 2.39E-18 BM | ATRX       |
| 7.77E-23 | -1.082453018 | 0.02  | 0.308 | 2.62E-18 BM | ARHGAP30   |
| 7.88E-23 | -1.044295198 | 0     | 0.285 | 2.65E-18 BM | CASP4      |
| 9.10E-23 | -1.319956339 | 0.028 | 0.313 | 3.07E-18 BM | TKT        |
| 9.40E-23 | -1.065652453 | 0.016 | 0.301 | 3.17E-18 BM | SRRM2      |
| 1.00E-22 | -1.334145063 | 0.012 | 0.297 | 3.38E-18 BM | BIRC3      |
| 1.04E-22 | -1.037402469 | 0.012 | 0.297 | 3.50E-18 BM | OSTC       |
| 1.13E-22 | -1.06831491  | 0.032 | 0.317 | 3.81E-18 BM | NDUFA13    |
| 1.20E-22 | -1.449792242 | 0.028 | 0.312 | 4.03E-18 BM | COTL1      |
| 1.26E-22 | -1.114892972 | 0.012 | 0.296 | 4.24E-18 BM | SAMHD1     |

|           |               |        |        |              |           |
|-----------|---------------|--------|--------|--------------|-----------|
| 1. 28E-22 | -1. 023626508 | 0. 012 | 0. 296 | 4. 30E-18 BM | PSMC5     |
| 1. 30E-22 | -1. 112396586 | 0. 008 | 0. 291 | 4. 38E-18 BM | PRKCB     |
| 1. 34E-22 | -1. 046329359 | 0. 012 | 0. 296 | 4. 53E-18 BM | RNH1      |
| 1. 60E-22 | -1. 039091926 | 0. 012 | 0. 295 | 5. 40E-18 BM | KRTCAP2   |
| 1. 85E-22 | -1. 154426327 | 0. 036 | 0. 321 | 6. 23E-18 BM | HMGB2     |
| 2. 07E-22 | -1. 032105825 | 0. 02  | 0. 305 | 6. 96E-18 BM | MRPL20    |
| 2. 22E-22 | -1. 119777871 | 0. 024 | 0. 306 | 7. 48E-18 BM | YWHAQ     |
| 2. 40E-22 | -1. 042795401 | 0. 012 | 0. 293 | 8. 08E-18 BM | GPBP1     |
| 2. 56E-22 | -1. 193714396 | 0. 008 | 0. 288 | 8. 62E-18 BM | CTSC      |
| 3. 07E-22 | -1. 014654164 | 0. 012 | 0. 292 | 1. 03E-17 BM | ESD       |
| 3. 12E-22 | -1. 139564063 | 0. 123 | 0. 393 | 1. 05E-17 BM | WDR83OS   |
| 3. 22E-22 | -1. 020503434 | 0. 012 | 0. 292 | 1. 08E-17 BM | C19orf70  |
| 3. 49E-22 | -1. 149401555 | 0. 008 | 0. 288 | 1. 18E-17 BM | GLIPR1    |
| 3. 61E-22 | -1. 005724973 | 0. 008 | 0. 287 | 1. 22E-17 BM | NDUFB5    |
| 4. 08E-22 | -1. 023670946 | 0. 004 | 0. 282 | 1. 38E-17 BM | TAF1D     |
| 4. 19E-22 | -1. 031443579 | 0. 008 | 0. 289 | 1. 41E-17 BM | TECR      |
| 4. 59E-22 | -1. 757443947 | 0. 126 | 0. 392 | 1. 55E-17 BM | PSAP      |
| 4. 95E-22 | -1. 321604748 | 0. 004 | 0. 283 | 1. 67E-17 BM | C1orf56   |
| 5. 57E-22 | -1. 053686888 | 0. 028 | 0. 306 | 1. 88E-17 BM | C19orf60  |
| 5. 69E-22 | -1. 101397696 | 0. 028 | 0. 306 | 1. 92E-17 BM | WIPF1     |
| 5. 77E-22 | -1. 009400059 | 0. 012 | 0. 289 | 1. 94E-17 BM | MRPL57    |
| 5. 93E-22 | -1. 243764728 | 0. 032 | 0. 309 | 2. 00E-17 BM | XIST      |
| 6. 19E-22 | -1. 048188148 | 0. 02  | 0. 297 | 2. 09E-17 BM | TMEM219   |
| 6. 31E-22 | -1. 093824272 | 0. 008 | 0. 284 | 2. 13E-17 BM | DHRS7     |
| 6. 61E-22 | -1. 061232663 | 0. 024 | 0. 301 | 2. 23E-17 BM | HMHA1     |
| 6. 95E-22 | -1. 013815    | 0. 004 | 0. 279 | 2. 34E-17 BM | DNAJC7    |
| 8. 81E-22 | -1. 069584173 | 0. 561 | 0. 637 | 2. 97E-17 BM | TCEB2     |
| 1. 04E-21 | -1. 025671472 | 0. 008 | 0. 282 | 3. 49E-17 BM | GIMAP2    |
| 1. 11E-21 | -1. 00274295  | 0. 02  | 0. 296 | 3. 75E-17 BM | ALKBH7    |
| 1. 12E-21 | -1. 00490421  | 0. 012 | 0. 287 | 3. 78E-17 BM | SRI       |
| 1. 19E-21 | -1. 035980829 | 0. 016 | 0. 291 | 4. 01E-17 BM | ANAPC11   |
| 1. 21E-21 | -1. 073465851 | 0. 016 | 0. 29  | 4. 07E-17 BM | H2AFY     |
| 1. 36E-21 | -1. 077209674 | 0. 012 | 0. 285 | 4. 59E-17 BM | CFLAR     |
| 1. 40E-21 | -1. 041030563 | 0. 016 | 0. 291 | 4. 70E-17 BM | ARHGEF1   |
| 1. 49E-21 | -1. 062142671 | 0. 02  | 0. 293 | 5. 03E-17 BM | TAF7      |
| 1. 66E-21 | -1. 119420042 | 0. 04  | 0. 313 | 5. 60E-17 BM | SERPINB1  |
| 1. 82E-21 | -1. 391220863 | 0. 028 | 0. 3   | 6. 13E-17 BM | GZMM      |
| 1. 91E-21 | -1. 076606305 | 0. 024 | 0. 296 | 6. 44E-17 BM | SEPT1     |
| 2. 15E-21 | -1. 017362761 | 0. 012 | 0. 283 | 7. 23E-17 BM | NKTR      |
| 2. 39E-21 | -1. 039742743 | 0. 02  | 0. 292 | 8. 06E-17 BM | AAK1      |
| 2. 53E-21 | -1. 018390553 | 0. 043 | 0. 317 | 8. 51E-17 BM | TMEM230   |
| 2. 69E-21 | -1. 006755949 | 0. 004 | 0. 275 | 9. 06E-17 BM | OCIAD2    |
| 3. 26E-21 | -1. 015338543 | 0. 032 | 0. 304 | 1. 10E-16 BM | TRAM1     |
| 3. 29E-21 | -1. 030564428 | 0. 012 | 0. 282 | 1. 11E-16 BM | BAX       |
| 3. 38E-21 | -1. 051255108 | 0. 024 | 0. 295 | 1. 14E-16 BM | SCP2      |
| 3. 69E-21 | -1. 138537514 | 0. 016 | 0. 287 | 1. 24E-16 BM | LINC00861 |
| 3. 72E-21 | -1. 003652215 | 0. 008 | 0. 276 | 1. 25E-16 BM | MRPL33    |
| 3. 89E-21 | -1. 007772539 | 0. 012 | 0. 283 | 1. 31E-16 BM | PSMB8-AS1 |
| 3. 91E-21 | -1. 047810389 | 0. 04  | 0. 31  | 1. 32E-16 BM | RBM8A     |
| 4. 35E-21 | -1. 00221517  | 0. 012 | 0. 28  | 1. 47E-16 BM | HNRNPR    |
| 4. 55E-21 | -1. 022473625 | 0. 043 | 0. 314 | 1. 53E-16 BM | NDFIP1    |

|           |               |        |        |              |            |
|-----------|---------------|--------|--------|--------------|------------|
| 5. 10E-21 | -1. 017814311 | 0      | 0. 266 | 1. 72E-16 BM | PSMB10     |
| 6. 21E-21 | -1. 042936202 | 0. 008 | 0. 274 | 2. 09E-16 BM | GNAI2      |
| 7. 05E-21 | -1. 073705626 | 0. 059 | 0. 326 | 2. 38E-16 BM | MBNL1      |
| 7. 66E-21 | -1. 014123334 | 0. 036 | 0. 304 | 2. 58E-16 BM | RNPS1      |
| 7. 87E-21 | -1. 143354495 | 0. 134 | 0. 392 | 2. 65E-16 BM | CALM3      |
| 9. 10E-21 | -1. 030447914 | 0. 036 | 0. 304 | 3. 07E-16 BM | NCOR1      |
| 1. 47E-20 | -1. 030345343 | 0. 032 | 0. 296 | 4. 96E-16 BM | SP100      |
| 1. 69E-20 | -1. 073293736 | 0. 016 | 0. 278 | 5. 68E-16 BM | VAMP5      |
| 1. 93E-20 | -1. 062901809 | 0. 024 | 0. 288 | 6. 50E-16 BM | PTP4A2     |
| 2. 25E-20 | -1. 022853173 | 0. 024 | 0. 285 | 7. 59E-16 BM | NAA38      |
| 2. 80E-20 | -1. 025932222 | 0. 04  | 0. 302 | 9. 43E-16 BM | DDX6       |
| 3. 29E-20 | -1. 001914206 | 0. 028 | 0. 288 | 1. 11E-15 BM | CHURC1     |
| 3. 90E-20 | -1. 07916154  | 0. 099 | 0. 354 | 1. 31E-15 BM | NDUFA3     |
| 4. 89E-20 | -1. 063900509 | 0. 02  | 0. 278 | 1. 65E-15 BM | LBH        |
| 4. 96E-20 | -1. 016056476 | 0. 032 | 0. 291 | 1. 67E-15 BM | ENY2       |
| 5. 09E-20 | -1. 007114993 | 0. 059 | 0. 317 | 1. 72E-15 BM | GADD45GIP1 |
| 5. 22E-20 | -1. 791326524 | 0. 02  | 0. 277 | 1. 76E-15 BM | RPS4Y1     |
| 5. 47E-20 | -1. 068183486 | 0. 016 | 0. 273 | 1. 84E-15 BM | FCMR       |
| 5. 51E-20 | -1. 008466256 | 0. 016 | 0. 273 | 1. 86E-15 BM | P4HB       |
| 6. 59E-20 | -1. 00222655  | 0. 04  | 0. 298 | 2. 22E-15 BM | BCAP31     |
| 7. 28E-20 | -2. 327401717 | 0. 024 | 0. 28  | 2. 45E-15 BM | GZMA       |
| 7. 55E-20 | -1. 011133546 | 0. 016 | 0. 272 | 2. 55E-15 BM | BTN3A2     |
| 7. 75E-20 | -1. 003129652 | 0. 04  | 0. 298 | 2. 61E-15 BM | CYCS       |
| 1. 07E-19 | -2. 516133061 | 0. 079 | 0. 33  | 3. 62E-15 BM | FCER1G     |
| 1. 25E-19 | -1. 024199144 | 0. 008 | 0. 26  | 4. 20E-15 BM | VASP       |
| 1. 50E-19 | -1. 077964156 | 0      | 0. 25  | 5. 05E-15 BM | LTA4H      |
| 1. 51E-19 | -1. 064745075 | 0. 012 | 0. 264 | 5. 08E-15 BM | ISG15      |
| 1. 60E-19 | -1. 023810157 | 0. 02  | 0. 274 | 5. 41E-15 BM | MDM4       |
| 1. 70E-19 | -1. 101980778 | 0. 02  | 0. 274 | 5. 72E-15 BM | DOK2       |
| 1. 92E-19 | -1. 011717025 | 0. 055 | 0. 308 | 6. 46E-15 BM | EIF2S2     |
| 2. 06E-19 | -1. 253238881 | 0. 02  | 0. 271 | 6. 93E-15 BM | NCF1       |
| 2. 31E-19 | -1. 070290875 | 0. 04  | 0. 293 | 7. 79E-15 BM | ATP6VOB    |
| 2. 33E-19 | -3. 441097724 | 0. 119 | 0. 358 | 7. 84E-15 BM | HLA-DRA    |
| 2. 37E-19 | -1. 001235835 | 0. 008 | 0. 257 | 7. 99E-15 BM | CNPY3      |
| 2. 54E-19 | -1. 022856083 | 0. 055 | 0. 309 | 8. 57E-15 BM | CAPZA2     |
| 4. 08E-19 | -3. 232226273 | 0. 13  | 0. 364 | 1. 38E-14 BM | TYROBP     |
| 6. 10E-19 | -1. 013360394 | 0. 02  | 0. 267 | 2. 05E-14 BM | TGFB1      |
| 7. 23E-19 | -1. 006138753 | 0. 016 | 0. 262 | 2. 44E-14 BM | RAP1B      |
| 9. 37E-19 | -1. 070218269 | 0. 115 | 0. 355 | 3. 16E-14 BM | LAMTOR1    |
| 1. 12E-18 | -1. 017423018 | 0. 008 | 0. 25  | 3. 79E-14 BM | ANXA5      |
| 1. 91E-18 | -3. 679248731 | 0. 083 | 0. 323 | 6. 42E-14 BM | NKG7       |
| 2. 17E-18 | -1. 025490925 | 0. 024 | 0. 266 | 7. 30E-14 BM | AHNAK      |
| 2. 46E-18 | -1. 082439656 | 0. 043 | 0. 285 | 8. 29E-14 BM | GSTO1      |
| 2. 81E-18 | -1. 031843683 | 0. 024 | 0. 265 | 9. 46E-14 BM | FLNA       |
| 3. 19E-18 | -2. 09636648  | 0. 028 | 0. 267 | 1. 08E-13 BM | CST7       |
| 4. 11E-18 | -1. 035957724 | 0. 075 | 0. 315 | 1. 38E-13 BM | MT-ND4L    |
| 6. 02E-18 | -1. 151227402 | 0. 055 | 0. 293 | 2. 03E-13 BM | CTSD       |
| 1. 88E-17 | -1. 158636354 | 0. 047 | 0. 28  | 6. 32E-13 BM | ITGB1      |
| 1. 39E-16 | -2. 843145165 | 0. 123 | 0. 345 | 4. 68E-12 BM | CCL5       |
| 2. 72E-16 | -2. 510054182 | 0. 051 | 0. 271 | 9. 17E-12 BM | KLRB1      |
| 9. 76E-16 | -1. 120322597 | 0. 067 | 0. 283 | 3. 29E-11 BM | TIMP1      |

|          |              |       |       |                |               |
|----------|--------------|-------|-------|----------------|---------------|
| 3.91E-14 | -1.017797142 | 0.119 | 0.331 | 1.32E-09 BM    | MT2A          |
| 8.62E-14 | -2.138401895 | 0.071 | 0.264 | 2.90E-09 BM    | LST1          |
| 6.83E-12 | -4.154850913 | 0.134 | 0.302 | 2.30E-07 BM    | LYZ           |
| 8.76E-09 | -3.825262709 | 0.134 | 0.264 | 0.000295207 BM | GNLY          |
| 3.97E-07 | -2.709367207 | 0.146 | 0.252 | 0.013391235 BM | CST3          |
| 0        | 5.771289618  | 0.989 | 0.025 | 0 Platelets    | ACRBP         |
| 0        | 5.747205286  | 1     | 0.061 | 0 Platelets    | SDPR          |
| 0        | 5.562600624  | 0.989 | 0.034 | 0 Platelets    | TUBB1         |
| 0        | 5.447840975  | 1     | 0.014 | 0 Platelets    | GP9           |
| 0        | 5.334678014  | 0.9   | 0.023 | 0 Platelets    | TSC22D1       |
| 0        | 5.245789029  | 0.944 | 0.046 | 0 Platelets    | CLU           |
| 0        | 5.24515452   | 0.933 | 0.012 | 0 Platelets    | PTCRA         |
| 0        | 4.706100451  | 0.922 | 0.008 | 0 Platelets    | TMEM40        |
| 0        | 4.654618976  | 0.889 | 0.029 | 0 Platelets    | CD9           |
| 0        | 4.418195741  | 0.967 | 0.01  | 0 Platelets    | CMTM5         |
| 0        | 4.416304481  | 0.878 | 0.043 | 0 Platelets    | MMD           |
| 0        | 4.386926122  | 0.933 | 0.019 | 0 Platelets    | TREML1        |
| 0        | 4.362842277  | 0.922 | 0.051 | 0 Platelets    | RUFY1         |
| 0        | 4.237375046  | 0.778 | 0.024 | 0 Platelets    | MYL9          |
| 0        | 4.21114601   | 0.922 | 0.03  | 0 Platelets    | SPARC         |
| 0        | 3.898783069  | 0.867 | 0.014 | 0 Platelets    | ITGA2B        |
| 0        | 3.847615932  | 0.789 | 0.006 | 0 Platelets    | CLEC1B        |
| 0        | 3.843758337  | 0.867 | 0.01  | 0 Platelets    | CTTN          |
| 0        | 3.805691632  | 0.756 | 0.007 | 0 Platelets    | CLDN5         |
| 0        | 3.715951236  | 0.833 | 0.023 | 0 Platelets    | AP001189.4    |
| 0        | 3.657044768  | 0.722 | 0.013 | 0 Platelets    | C2orf88       |
| 0        | 3.624665192  | 0.711 | 0.014 | 0 Platelets    | HIST1H3H      |
| 0        | 3.547513705  | 0.811 | 0.009 | 0 Platelets    | HRAT92        |
| 0        | 3.514560658  | 0.678 | 0.01  | 0 Platelets    | HIST1H2BJ     |
| 0        | 3.425878302  | 0.633 | 0.007 | 0 Platelets    | LCN2          |
| 0        | 3.423511447  | 0.711 | 0.012 | 0 Platelets    | PF4V1         |
| 0        | 3.381601863  | 0.678 | 0.005 | 0 Platelets    | ESAM          |
| 0        | 3.237929983  | 0.722 | 0.013 | 0 Platelets    | AP003068.23   |
| 0        | 3.231076597  | 0.711 | 0.012 | 0 Platelets    | NEXN          |
| 0        | 3.197971505  | 0.656 | 0.003 | 0 Platelets    | RP11-879F14.2 |
| 0        | 3.165559999  | 0.7   | 0.013 | 0 Platelets    | C6orf25       |
| 0        | 3.015501256  | 0.622 | 0.006 | 0 Platelets    | ENKUR         |
| 0        | 3.003060546  | 0.7   | 0.016 | 0 Platelets    | DMTN          |
| 0        | 2.980486945  | 0.667 | 0.018 | 0 Platelets    | PTGS1         |
| 0        | 2.92892677   | 0.633 | 0.003 | 0 Platelets    | RP11-501J20.5 |
| 0        | 2.910640961  | 0.667 | 0.02  | 0 Platelets    | CA2           |
| 0        | 2.897725669  | 0.589 | 0.012 | 0 Platelets    | GAS2L1        |
| 0        | 2.884269121  | 0.589 | 0.003 | 0 Platelets    | LY6G6F        |
| 0        | 2.853466784  | 0.556 | 0.008 | 0 Platelets    | TNNC2         |
| 0        | 2.844782488  | 0.644 | 0.006 | 0 Platelets    | SMOX          |
| 0        | 2.836736956  | 0.544 | 0.01  | 0 Platelets    | SMIM5         |
| 0        | 2.713624241  | 0.578 | 0.006 | 0 Platelets    | SCN1B         |
| 0        | 2.682022461  | 0.589 | 0.012 | 0 Platelets    | GP1BA         |
| 0        | 2.578473982  | 0.567 | 0.016 | 0 Platelets    | ABCC3         |
| 0        | 2.566741147  | 0.578 | 0.003 | 0 Platelets    | ARHGAP6       |
| 0        | 2.561439494  | 0.589 | 0.011 | 0 Platelets    | GMPR          |

|           |             |       |       |           |           |              |
|-----------|-------------|-------|-------|-----------|-----------|--------------|
| 0         | 2.551124101 | 0.522 | 0.005 | 0         | Platelets | C19orf33     |
| 0         | 2.518988067 | 0.544 | 0.007 | 0         | Platelets | SH3BGR12     |
| 0         | 2.495591702 | 0.556 | 0.012 | 0         | Platelets | PRKAR2B      |
| 0         | 2.49365447  | 0.556 | 0.007 | 0         | Platelets | MYLK         |
| 0         | 2.388882093 | 0.456 | 0.01  | 0         | Platelets | GFI1B        |
| 0         | 2.355289972 | 0.533 | 0.004 | 0         | Platelets | HGD          |
| 0         | 2.324460905 | 0.422 | 0.003 | 0         | Platelets | TNFSF4       |
| 0         | 2.295727604 | 0.511 | 0.013 | 0         | Platelets | FAXDC2       |
| 0         | 2.193178679 | 0.4   | 0.006 | 0         | Platelets | SPX          |
| 0         | 2.187512805 | 0.389 | 0.002 | 0         | Platelets | TRAPPC3L     |
| 0         | 2.162330695 | 0.422 | 0.003 | 0         | Platelets | MEIS1        |
| 0         | 2.15853661  | 0.4   | 0.002 | 0         | Platelets | ALOX12       |
| 0         | 2.130900382 | 0.433 | 0.002 | 0         | Platelets | AQP10        |
| 0         | 2.112281267 | 0.367 | 0.004 | 0         | Platelets | LGALS12      |
| 0         | 1.925341204 | 0.267 | 0.002 | 0         | Platelets | PDGFA        |
| 0         | 1.92406492  | 0.411 | 0.002 | 0         | Platelets | ITGB3        |
| 0         | 1.918232045 | 0.4   | 0.003 | 0         | Platelets | GUCY1B3      |
| 0         | 1.88378735  | 0.4   | 0.003 | 0         | Platelets | GNAZ         |
| 0         | 1.859478152 | 0.378 | 0.006 | 0         | Platelets | LINC00989    |
| 0         | 1.826698313 | 0.378 | 0.005 | 0         | Platelets | TAL1         |
| 0         | 1.814704797 | 0.3   | 0.003 | 0         | Platelets | MYZAP        |
| 0         | 1.803842916 | 0.344 | 0.005 | 0         | Platelets | GP6          |
| 0         | 1.795302327 | 0.344 | 0.003 | 0         | Platelets | PCP2         |
| 0         | 1.794008028 | 0.344 | 0.001 | 0         | Platelets | TDRP         |
| 0         | 1.758598936 | 0.356 | 0.002 | 0         | Platelets | LTBP1        |
| 0         | 1.738159644 | 0.356 | 0.002 | 0         | Platelets | SELP         |
| 0         | 1.720173651 | 0.3   | 0.002 | 0         | Platelets | GATA1        |
| 0         | 1.682539151 | 0.311 | 0.001 | 0         | Platelets | ARG2         |
| 0         | 1.67605222  | 0.311 | 0.003 | 0         | Platelets | STON2        |
| 0         | 1.663548358 | 0.289 | 0.001 | 0         | Platelets | AC137932.6   |
| 0         | 1.655687985 | 0.267 | 0.003 | 0         | Platelets | SPOCD1       |
| 0         | 1.608254945 | 0.289 | 0.002 | 0         | Platelets | SEPT5        |
| 0         | 1.586276399 | 0.289 | 0.001 | 0         | Platelets | LGALSL       |
| 0         | 1.566981676 | 0.278 | 0.003 | 0         | Platelets | DNM3         |
| 0         | 1.47738285  | 0.311 | 0.004 | 0         | Platelets | PDE5A        |
| 0         | 1.409171458 | 0.256 | 0.003 | 0         | Platelets | C1orf198     |
| 0         | 1.348546714 | 0.267 | 0.003 | 0         | Platelets | MFAP3L       |
| 0         | 1.320749681 | 0.256 | 0.002 | 0         | Platelets | ATP9A        |
| 0         | 1.315156082 | 0.256 | 0.001 | 0         | Platelets | FAM212B-AS1  |
| 7.02E-303 | 1.390431996 | 0.256 | 0.003 | 2.36E-298 | Platelets | DCLRE1A      |
| 2.11E-302 | 3.620479178 | 0.867 | 0.047 | 7.10E-298 | Platelets | F13A1        |
| 1.17E-296 | 2.175528637 | 0.478 | 0.013 | 3.94E-292 | Platelets | SENCR        |
| 2.97E-288 | 2.751617506 | 0.511 | 0.016 | 1.00E-283 | Platelets | PDZK1IP1     |
| 6.83E-282 | 1.950235204 | 0.344 | 0.007 | 2.30E-277 | Platelets | HIST1H2AE    |
| 8.25E-279 | 5.853617527 | 0.989 | 0.071 | 2.78E-274 | Platelets | HIST1H2AC    |
| 2.31E-274 | 3.623163149 | 0.711 | 0.034 | 7.79E-270 | Platelets | RP11-367G6.3 |
| 3.65E-272 | 3.769384345 | 0.944 | 0.065 | 1.23E-267 | Platelets | PGRMC1       |
| 4.99E-269 | 3.878605296 | 0.9   | 0.059 | 1.68E-264 | Platelets | 2-Mar        |
| 3.49E-257 | 3.033575768 | 0.611 | 0.026 | 1.18E-252 | Platelets | DAB2         |
| 3.26E-254 | 1.768683002 | 0.278 | 0.005 | 1.10E-249 | Platelets | FRMD3        |
| 1.64E-249 | 3.35237152  | 0.656 | 0.031 | 5.54E-245 | Platelets | NFE2         |

|            |              |        |        |                      |                |
|------------|--------------|--------|--------|----------------------|----------------|
| 1. 78E-244 | 3. 153955955 | 0. 789 | 0. 046 | 6. 01E-240 Platelets | SNCA           |
| 1. 99E-242 | 4. 11926246  | 0. 878 | 0. 062 | 6. 71E-238 Platelets | MPP1           |
| 5. 59E-240 | 6. 289426212 | 1      | 0. 086 | 1. 88E-235 Platelets | GNG11          |
| 6. 26E-236 | 5. 589262553 | 1      | 0. 088 | 2. 11E-231 Platelets | RGS18          |
| 8. 52E-236 | 1. 556680587 | 0. 256 | 0. 004 | 2. 87E-231 Platelets | JAM3           |
| 3. 03E-232 | 2. 721342861 | 0. 489 | 0. 018 | 1. 02E-227 Platelets | HIST2H2BE      |
| 1. 02E-229 | 1. 70845185  | 0. 267 | 0. 005 | 3. 43E-225 Platelets | RP11-354E11. 2 |
| 2. 28E-229 | 1. 419154271 | 0. 267 | 0. 005 | 7. 69E-225 Platelets | BEND2          |
| 1. 65E-224 | 3. 416122501 | 0. 778 | 0. 051 | 5. 56E-220 Platelets | TPM1           |
| 6. 99E-221 | 1. 744195035 | 0. 267 | 0. 005 | 2. 36E-216 Platelets | CTNNA1         |
| 8. 39E-219 | 3. 017785182 | 0. 722 | 0. 045 | 2. 83E-214 Platelets | LMNA           |
| 6. 87E-218 | 2. 425460877 | 0. 533 | 0. 023 | 2. 32E-213 Platelets | SMIM3          |
| 5. 04E-217 | 2. 518964348 | 0. 589 | 0. 029 | 1. 70E-212 Platelets | FHL1           |
| 7. 11E-217 | 5. 06703402  | 0. 989 | 0. 094 | 2. 40E-212 Platelets | NRGN           |
| 1. 48E-212 | 2. 09728492  | 0. 333 | 0. 009 | 4. 97E-208 Platelets | FAM212A        |
| 1. 26E-205 | 1. 855083352 | 0. 289 | 0. 007 | 4. 26E-201 Platelets | TBXA2R         |
| 2. 99E-203 | 2. 235006389 | 0. 456 | 0. 018 | 1. 01E-198 Platelets | PPP1R14A       |
| 5. 09E-202 | 3. 473193837 | 0. 889 | 0. 078 | 1. 71E-197 Platelets | PDLIM1         |
| 4. 05E-197 | 3. 186678081 | 0. 822 | 0. 067 | 1. 36E-192 Platelets | TUBA1C         |
| 3. 22E-196 | 2. 47738419  | 0. 522 | 0. 025 | 1. 08E-191 Platelets | GADD45A        |
| 1. 31E-192 | 2. 232661653 | 0. 433 | 0. 017 | 4. 42E-188 Platelets | CDKN1A         |
| 1. 14E-189 | 4. 364336795 | 0. 911 | 0. 089 | 3. 83E-185 Platelets | MAP3K7CL       |
| 1. 26E-188 | 3. 380532371 | 0. 733 | 0. 054 | 4. 25E-184 Platelets | VIM-AS1        |
| 8. 97E-188 | 1. 674211942 | 0. 322 | 0. 009 | 3. 02E-183 Platelets | THBS1          |
| 2. 02E-185 | 3. 048880636 | 0. 744 | 0. 057 | 6. 80E-181 Platelets | PLA2G12A       |
| 3. 22E-184 | 1. 957329355 | 0. 378 | 0. 014 | 1. 09E-179 Platelets | MGLL           |
| 1. 51E-182 | 7. 502071889 | 1      | 0. 119 | 5. 08E-178 Platelets | PF4            |
| 1. 16E-180 | 2. 497544968 | 0. 611 | 0. 038 | 3. 90E-176 Platelets | XPNPEP1        |
| 1. 20E-179 | 2. 424219892 | 0. 556 | 0. 031 | 4. 04E-175 Platelets | AHCTF1         |
| 8. 87E-173 | 3. 076705138 | 0. 656 | 0. 046 | 2. 99E-168 Platelets | HIST1H1C       |
| 1. 19E-164 | 1. 688627544 | 0. 322 | 0. 011 | 4. 01E-160 Platelets | KIFC3          |
| 1. 11E-159 | 1. 918085612 | 0. 367 | 0. 015 | 3. 73E-155 Platelets | MTURN          |
| 7. 17E-157 | 7. 609045351 | 1      | 0. 143 | 2. 42E-152 Platelets | PPBP           |
| 1. 71E-153 | 3. 624605893 | 0. 911 | 0. 113 | 5. 75E-149 Platelets | NGFRAP1        |
| 1. 84E-153 | 2. 446073897 | 0. 467 | 0. 025 | 6. 19E-149 Platelets | RAB27B         |
| 2. 53E-153 | 2. 230731768 | 0. 511 | 0. 031 | 8. 51E-149 Platelets | ARHGAP18       |
| 2. 48E-151 | 3. 154138312 | 0. 778 | 0. 078 | 8. 35E-147 Platelets | DAPP1          |
| 1. 86E-148 | 3. 978262085 | 0. 978 | 0. 142 | 6. 27E-144 Platelets | CTSA           |
| 6. 64E-143 | 4. 090390679 | 0. 978 | 0. 15  | 2. 24E-138 Platelets | TPM4           |
| 2. 13E-142 | 1. 753476194 | 0. 333 | 0. 014 | 7. 18E-138 Platelets | ZNF438         |
| 5. 17E-141 | 2. 462476437 | 0. 511 | 0. 034 | 1. 74E-136 Platelets | TMEM140        |
| 1. 70E-132 | 1. 876629791 | 0. 344 | 0. 016 | 5. 73E-128 Platelets | HIST1H2BG      |
| 4. 25E-130 | 3. 815130033 | 0. 956 | 0. 156 | 1. 43E-125 Platelets | GRAP2          |
| 2. 47E-127 | 1. 662410757 | 0. 367 | 0. 019 | 8. 34E-123 Platelets | FAM63A         |
| 1. 89E-126 | 1. 588795777 | 0. 322 | 0. 014 | 6. 37E-122 Platelets | SCFD2          |
| 5. 30E-125 | 1. 12517316  | 0. 256 | 0. 009 | 1. 78E-120 Platelets | ZNF185         |
| 1. 03E-123 | 3. 667794688 | 0. 844 | 0. 119 | 3. 46E-119 Platelets | CARD19         |
| 1. 49E-123 | 1. 592976952 | 0. 289 | 0. 012 | 5. 01E-119 Platelets | PBX1           |
| 2. 73E-123 | 1. 609699951 | 0. 378 | 0. 02  | 9. 19E-119 Platelets | INF2           |
| 2. 52E-122 | 2. 852837128 | 0. 7   | 0. 077 | 8. 48E-118 Platelets | YWHAH          |
| 9. 82E-122 | 3. 303538109 | 0. 767 | 0. 096 | 3. 31E-117 Platelets | RNF11          |



|            |              |        |        |                      |             |
|------------|--------------|--------|--------|----------------------|-------------|
| 2. 95E-121 | 2. 0987147   | 0. 444 | 0. 029 | 9. 95E-117 Platelets | MEPCE       |
| 5. 68E-121 | 2. 650790908 | 0. 633 | 0. 062 | 1. 91E-116 Platelets | MLH3        |
| 8. 50E-118 | 2. 757535899 | 0. 678 | 0. 074 | 2. 87E-113 Platelets | RAB32       |
| 2. 66E-117 | 1. 582346713 | 0. 3   | 0. 013 | 8. 97E-113 Platelets | SSX2IP      |
| 5. 05E-117 | 1. 389163822 | 0. 278 | 0. 011 | 1. 70E-112 Platelets | SERPINE2    |
| 1. 60E-107 | 4. 891739546 | 0. 956 | 0. 199 | 5. 38E-103 Platelets | NCOA4       |
| 2. 24E-106 | 3. 930368793 | 0. 844 | 0. 142 | 7. 55E-102 Platelets | NT5C3A      |
| 1. 05E-105 | 2. 526511105 | 0. 522 | 0. 047 | 3. 55E-101 Platelets | PARVB       |
| 3. 84E-105 | 1. 486684374 | 0. 289 | 0. 014 | 1. 30E-100 Platelets | MOB3C       |
| 4. 57E-104 | 3. 986083424 | 0. 944 | 0. 197 | 1. 54E-99 Platelets  | FERMT3      |
| 2. 14E-101 | 3. 144021658 | 0. 856 | 0. 153 | 7. 22E-97 Platelets  | PTPN18      |
| 2. 45E-100 | 1. 468079424 | 0. 289 | 0. 015 | 8. 26E-96 Platelets  | FAH         |
| 9. 41E-99  | 2. 32038882  | 0. 589 | 0. 064 | 3. 17E-94 Platelets  | GSN         |
| 2. 03E-98  | 3. 022327345 | 0. 789 | 0. 127 | 6. 85E-94 Platelets  | ILK         |
| 2. 81E-98  | 4. 644614511 | 1      | 0. 263 | 9. 47E-94 Platelets  | TUBA4A      |
| 1. 32E-96  | 2. 516176698 | 0. 667 | 0. 087 | 4. 45E-92 Platelets  | VCL         |
| 1. 36E-94  | 1. 76616995  | 0. 344 | 0. 022 | 4. 59E-90 Platelets  | F11R        |
| 2. 76E-93  | 2. 41498624  | 0. 622 | 0. 076 | 9. 28E-89 Platelets  | MIR4435-2HG |
| 2. 85E-93  | 3. 598867067 | 0. 889 | 0. 191 | 9. 60E-89 Platelets  | MAX         |
| 4. 08E-93  | 2. 215511567 | 0. 478 | 0. 044 | 1. 37E-88 Platelets  | SLA2        |
| 7. 90E-93  | 2. 703913785 | 0. 678 | 0. 094 | 2. 66E-88 Platelets  | MFSD1       |
| 3. 02E-92  | 3. 656041133 | 0. 878 | 0. 187 | 1. 02E-87 Platelets  | LIMS1       |
| 4. 58E-92  | 2. 252933403 | 0. 467 | 0. 043 | 1. 54E-87 Platelets  | SNN         |
| 6. 46E-92  | 2. 432429916 | 0. 578 | 0. 067 | 2. 18E-87 Platelets  | CD151       |
| 2. 57E-89  | 2. 795391537 | 0. 778 | 0. 136 | 8. 66E-85 Platelets  | ACTN1       |
| 2. 34E-88  | 1. 759543405 | 0. 422 | 0. 036 | 7. 87E-84 Platelets  | PYGL        |
| 1. 93E-87  | 2. 320877484 | 0. 544 | 0. 062 | 6. 49E-83 Platelets  | TAX1BP3     |
| 9. 92E-86  | 2. 033670543 | 0. 433 | 0. 039 | 3. 34E-81 Platelets  | MCUR1       |
| 1. 91E-85  | 2. 654459204 | 0. 711 | 0. 113 | 6. 44E-81 Platelets  | STOM        |
| 8. 46E-85  | 2. 431319859 | 0. 533 | 0. 061 | 2. 85E-80 Platelets  | LYPLAL1     |
| 1. 09E-83  | 1. 634260047 | 0. 367 | 0. 028 | 3. 66E-79 Platelets  | PDLIM7      |
| 1. 10E-82  | 2. 143053393 | 0. 478 | 0. 05  | 3. 70E-78 Platelets  | TMEM91      |
| 1. 42E-80  | 2. 542759289 | 0. 756 | 0. 14  | 4. 79E-76 Platelets  | WBP2        |
| 2. 87E-79  | 1. 436961228 | 0. 278 | 0. 017 | 9. 65E-75 Platelets  | STRN4       |
| 3. 38E-79  | 2. 084904445 | 0. 467 | 0. 049 | 1. 14E-74 Platelets  | TPTEP1      |
| 1. 13E-78  | 3. 396915724 | 0. 889 | 0. 232 | 3. 80E-74 Platelets  | RAB11A      |
| 1. 07E-75  | 4. 30722102  | 0. 922 | 0. 281 | 3. 61E-71 Platelets  | GSTO1       |
| 2. 06E-75  | 2. 917138432 | 0. 767 | 0. 16  | 6. 95E-71 Platelets  | SNAP23      |
| 6. 34E-74  | 3. 081362808 | 0. 933 | 0. 279 | 2. 14E-69 Platelets  | TIMP1       |
| 4. 54E-72  | 4. 451661112 | 1      | 0. 433 | 1. 53E-67 Platelets  | GPX1        |
| 4. 61E-71  | 3. 394561351 | 0. 989 | 0. 387 | 1. 55E-66 Platelets  | CALM3       |
| 6. 65E-70  | 4. 204615078 | 0. 978 | 0. 417 | 2. 24E-65 Platelets  | RGS10       |
| 8. 50E-70  | 2. 030881816 | 0. 522 | 0. 069 | 2. 87E-65 Platelets  | CD226       |
| 9. 21E-70  | 2. 091210799 | 0. 456 | 0. 053 | 3. 10E-65 Platelets  | CORO1C      |
| 1. 33E-69  | 2. 468063584 | 0. 578 | 0. 088 | 4. 48E-65 Platelets  | SPNS1       |
| 3. 79E-69  | 3. 85786153  | 1      | 0. 479 | 1. 28E-64 Platelets  | TAGLN2      |
| 2. 71E-68  | 2. 890789042 | 0. 922 | 0. 304 | 9. 14E-64 Platelets  | CAPZA2      |
| 4. 94E-68  | 1. 524333519 | 0. 267 | 0. 018 | 1. 66E-63 Platelets  | HBQ1        |
| 4. 83E-66  | 2. 872815386 | 1      | 0. 34  | 1. 63E-61 Platelets  | CCL5        |
| 1. 50E-65  | 1. 934491728 | 0. 378 | 0. 038 | 5. 04E-61 Platelets  | ODC1        |
| 5. 00E-65  | 3. 360475347 | 0. 989 | 0. 43  | 1. 68E-60 Platelets  | SAT1        |

|           |               |        |        |                     |           |
|-----------|---------------|--------|--------|---------------------|-----------|
| 5. 22E-65 | 1. 626631849  | 0. 311 | 0. 026 | 1. 76E-60 Platelets | PADI4     |
| 1. 42E-64 | 2. 144278041  | 0. 444 | 0. 054 | 4. 80E-60 Platelets | UBA7      |
| 3. 02E-64 | 2. 336965159  | 0. 678 | 0. 131 | 1. 02E-59 Platelets | LINCO0152 |
| 5. 30E-64 | 1. 279533388  | 0. 278 | 0. 021 | 1. 78E-59 Platelets | PRKAR1B   |
| 1. 79E-63 | 2. 400863777  | 0. 444 | 0. 055 | 6. 03E-59 Platelets | SLC40A1   |
| 1. 40E-62 | 2. 114455793  | 0. 556 | 0. 088 | 4. 73E-58 Platelets | TMBIM1    |
| 5. 37E-62 | 2. 539740422  | 0. 722 | 0. 162 | 1. 81E-57 Platelets | TPST2     |
| 9. 70E-62 | 2. 722480122  | 0. 733 | 0. 171 | 3. 27E-57 Platelets | CDKN2D    |
| 7. 95E-61 | 2. 941714308  | 0. 911 | 0. 35  | 2. 68E-56 Platelets | LAMTOR1   |
| 1. 70E-60 | 1. 963892259  | 0. 389 | 0. 044 | 5. 71E-56 Platelets | SWI5      |
| 2. 26E-60 | 3. 331978407  | 0. 844 | 0. 27  | 7. 62E-56 Platelets | TLN1      |
| 2. 96E-60 | 2. 126714287  | 0. 533 | 0. 084 | 9. 98E-56 Platelets | APP       |
| 2. 40E-59 | 3. 242338268  | 1      | 0. 904 | 8. 09E-55 Platelets | OAZ1      |
| 3. 06E-59 | 1. 895626155  | 0. 411 | 0. 049 | 1. 03E-54 Platelets | BCL2L1    |
| 3. 37E-59 | 2. 8525654    | 0. 9   | 0. 336 | 1. 14E-54 Platelets | PRDX6     |
| 4. 60E-59 | 2. 481818882  | 0. 667 | 0. 144 | 1. 55E-54 Platelets | AMD1      |
| 4. 62E-59 | 2. 925333482  | 1      | 0. 796 | 1. 56E-54 Platelets | OST4      |
| 5. 92E-59 | 2. 893180705  | 1      | 0. 936 | 2. 00E-54 Platelets | H3F3A     |
| 8. 39E-59 | 1. 622150314  | 0. 367 | 0. 04  | 2. 83E-54 Platelets | WRB       |
| 1. 96E-58 | 2. 793200277  | 1      | 0. 896 | 6. 62E-54 Platelets | MYL12A    |
| 3. 79E-58 | 2. 515010652  | 0. 733 | 0. 184 | 1. 28E-53 Platelets | YPEL5     |
| 2. 11E-57 | 2. 624427071  | 0. 689 | 0. 16  | 7. 12E-53 Platelets | EMC3      |
| 2. 15E-57 | 2. 858371501  | 1      | 0. 732 | 7. 25E-53 Platelets | NAP1L1    |
| 3. 96E-57 | 2. 654642221  | 0. 956 | 0. 433 | 1. 33E-52 Platelets | PKM       |
| 2. 12E-56 | 1. 746739012  | 0. 256 | 0. 02  | 7. 14E-52 Platelets | HEMGN     |
| 3. 45E-56 | 2. 340197766  | 0. 467 | 0. 069 | 1. 16E-51 Platelets | IFRD1     |
| 6. 11E-56 | 2. 908082862  | 0. 967 | 0. 554 | 2. 06E-51 Platelets | GPX4      |
| 9. 17E-56 | 2. 538655606  | 0. 922 | 0. 392 | 3. 09E-51 Platelets | CCND3     |
| 1. 32E-55 | 3. 079434453  | 0. 944 | 0. 355 | 4. 46E-51 Platelets | MTRNR2L1  |
| 5. 93E-55 | 2. 777297702  | 0. 933 | 0. 405 | 2. 00E-50 Platelets | DYNLL1    |
| 2. 07E-54 | 2. 345026153  | 0. 6   | 0. 118 | 6. 98E-50 Platelets | GLUL      |
| 2. 75E-54 | 2. 376957144  | 0. 578 | 0. 112 | 9. 26E-50 Platelets | TLK1      |
| 4. 10E-54 | 2. 224753845  | 0. 544 | 0. 097 | 1. 38E-49 Platelets | RPA1      |
| 7. 02E-54 | 2. 272901806  | 0. 578 | 0. 111 | 2. 37E-49 Platelets | EIF2AK1   |
| 7. 82E-54 | 1. 686004006  | 0. 322 | 0. 033 | 2. 63E-49 Platelets | WIPI1     |
| 1. 73E-53 | -3. 587346413 | 0. 267 | 0. 992 | 5. 83E-49 Platelets | RPLP2     |
| 1. 79E-53 | -3. 266817085 | 0. 3   | 0. 988 | 6. 05E-49 Platelets | RPL7      |
| 3. 67E-53 | 1. 980579051  | 0. 467 | 0. 072 | 1. 24E-48 Platelets | PLEKH01   |
| 3. 83E-53 | -3. 243230763 | 0. 367 | 0. 987 | 1. 29E-48 Platelets | RPS19     |
| 5. 47E-53 | 2. 083708905  | 0. 6   | 0. 123 | 1. 84E-48 Platelets | RBBP6     |
| 6. 61E-53 | 2. 084939461  | 0. 467 | 0. 071 | 2. 23E-48 Platelets | CMIP      |
| 7. 84E-53 | -3. 296923464 | 0. 178 | 0. 979 | 2. 64E-48 Platelets | RPS9      |
| 9. 59E-53 | -3. 444411528 | 0. 233 | 0. 982 | 3. 23E-48 Platelets | RPL9      |
| 1. 03E-52 | -3. 376558836 | 0. 344 | 0. 996 | 3. 46E-48 Platelets | RPS12     |
| 1. 08E-52 | -3. 332121354 | 0. 256 | 0. 989 | 3. 65E-48 Platelets | RPL11     |
| 1. 21E-52 | -3. 414926462 | 0. 411 | 0. 992 | 4. 06E-48 Platelets | RPL13     |
| 1. 23E-52 | -3. 453162047 | 0. 233 | 0. 984 | 4. 13E-48 Platelets | RPS23     |
| 1. 53E-52 | -3. 117933512 | 0. 3   | 0. 989 | 5. 15E-48 Platelets | RPS15     |
| 1. 94E-52 | -3. 237885036 | 0. 222 | 0. 978 | 6. 55E-48 Platelets | RPL29     |
| 2. 33E-52 | -3. 163749451 | 0. 456 | 0. 995 | 7. 87E-48 Platelets | RPL21     |
| 2. 59E-52 | -3. 427224574 | 0. 122 | 0. 979 | 8. 73E-48 Platelets | RPL35     |

|           |               |        |        |                     |          |
|-----------|---------------|--------|--------|---------------------|----------|
| 2. 63E-52 | -2. 763979834 | 0. 644 | 0. 992 | 8. 86E-48 Platelets | RPLP1    |
| 2. 69E-52 | -3. 5023648   | 0. 222 | 0. 984 | 9. 05E-48 Platelets | RPS8     |
| 3. 39E-52 | -3. 445880728 | 0. 233 | 0. 989 | 1. 14E-47 Platelets | RPS2     |
| 3. 62E-52 | -3. 331525447 | 0. 2   | 0. 981 | 1. 22E-47 Platelets | RPL37    |
| 3. 98E-52 | -3. 236038516 | 0. 378 | 0. 991 | 1. 34E-47 Platelets | RPS14    |
| 4. 45E-52 | -3. 299280086 | 0. 156 | 0. 977 | 1. 50E-47 Platelets | RPL14    |
| 7. 37E-52 | -3. 299728207 | 0. 211 | 0. 988 | 2. 48E-47 Platelets | RPL30    |
| 7. 63E-52 | -3. 04531787  | 0. 544 | 0. 989 | 2. 57E-47 Platelets | RPS27A   |
| 7. 86E-52 | 1. 882611416  | 0. 333 | 0. 037 | 2. 65E-47 Platelets | PSTPIP2  |
| 1. 61E-51 | -3. 306160535 | 0. 244 | 0. 986 | 5. 42E-47 Platelets | RPL19    |
| 1. 88E-51 | -3. 356632869 | 0. 144 | 0. 982 | 6. 33E-47 Platelets | RPL12    |
| 2. 63E-51 | 2. 637478033  | 1      | 0. 894 | 8. 85E-47 Platelets | SH3BGRL3 |
| 2. 64E-51 | 2. 895173725  | 0. 644 | 0. 155 | 8. 91E-47 Platelets | ETFA     |
| 2. 78E-51 | -3. 227561724 | 0. 278 | 0. 984 | 9. 36E-47 Platelets | RPS4X    |
| 3. 17E-51 | -3. 35148508  | 0. 356 | 0. 988 | 1. 07E-46 Platelets | RPS18    |
| 3. 58E-51 | -3. 041681311 | 0. 578 | 0. 991 | 1. 21E-46 Platelets | RPL13A   |
| 3. 72E-51 | -3. 304199109 | 0. 256 | 0. 99  | 1. 25E-46 Platelets | RPL32    |
| 3. 83E-51 | -3. 380736998 | 0. 144 | 0. 982 | 1. 29E-46 Platelets | RPS17    |
| 4. 44E-51 | -3. 027417046 | 0. 411 | 0. 985 | 1. 50E-46 Platelets | RPL27A   |
| 4. 52E-51 | -3. 313152189 | 0. 211 | 0. 984 | 1. 52E-46 Platelets | RPL23A   |
| 4. 70E-51 | -3. 034672174 | 0. 322 | 0. 984 | 1. 59E-46 Platelets | RPL26    |
| 5. 21E-51 | -3. 318233375 | 0. 456 | 0. 991 | 1. 75E-46 Platelets | EEF1A1   |
| 6. 19E-51 | 2. 174991314  | 1      | 0. 997 | 2. 09E-46 Platelets | TMSB4X   |
| 7. 10E-51 | -3. 29058145  | 0. 333 | 0. 988 | 2. 39E-46 Platelets | RPL34    |
| 7. 27E-51 | -3. 036658442 | 0. 167 | 0. 965 | 2. 45E-46 Platelets | RPL24    |
| 8. 38E-51 | -3. 136756757 | 0. 633 | 0. 99  | 2. 82E-46 Platelets | RPS27    |
| 1. 06E-50 | -3. 143076064 | 0. 311 | 0. 986 | 3. 56E-46 Platelets | RPS28    |
| 1. 20E-50 | -3. 120097377 | 0. 389 | 0. 988 | 4. 04E-46 Platelets | RPS3A    |
| 1. 28E-50 | -3. 293560654 | 0. 267 | 0. 988 | 4. 32E-46 Platelets | RPS6     |
| 1. 31E-50 | -3. 223934329 | 0. 233 | 0. 983 | 4. 41E-46 Platelets | RPL31    |
| 1. 33E-50 | -3. 262346841 | 0. 156 | 0. 984 | 4. 46E-46 Platelets | RPS13    |
| 1. 57E-50 | -3. 066788173 | 0. 311 | 0. 986 | 5. 30E-46 Platelets | RPL28    |
| 1. 74E-50 | -3. 225904176 | 0. 289 | 0. 984 | 5. 85E-46 Platelets | RPL3     |
| 1. 78E-50 | 1. 959859532  | 0. 467 | 0. 075 | 6. 01E-46 Platelets | STX11    |
| 2. 23E-50 | -2. 791366651 | 0. 5   | 0. 99  | 7. 50E-46 Platelets | RPL41    |
| 2. 36E-50 | -3. 172094159 | 0. 167 | 0. 982 | 7. 96E-46 Platelets | RPS24    |
| 2. 70E-50 | -3. 227720836 | 0. 178 | 0. 978 | 9. 10E-46 Platelets | RPS29    |
| 2. 71E-50 | -3. 196767793 | 0. 167 | 0. 979 | 9. 13E-46 Platelets | RPS16    |
| 2. 71E-50 | -3. 325545136 | 0. 122 | 0. 969 | 9. 14E-46 Platelets | RPS5     |
| 2. 81E-50 | -3. 079846492 | 0. 2   | 0. 98  | 9. 45E-46 Platelets | RPL18    |
| 2. 89E-50 | -2. 930633466 | 0. 622 | 0. 991 | 9. 74E-46 Platelets | RPL10    |
| 3. 16E-50 | -3. 025564667 | 0. 211 | 0. 98  | 1. 06E-45 Platelets | RPL8     |
| 3. 95E-50 | -3. 04297557  | 0. 222 | 0. 98  | 1. 33E-45 Platelets | RPL37A   |
| 4. 09E-50 | -2. 877612158 | 0. 467 | 0. 99  | 1. 38E-45 Platelets | RPS15A   |
| 4. 40E-50 | -3. 031811122 | 0. 344 | 0. 985 | 1. 48E-45 Platelets | TMSB10   |
| 4. 65E-50 | -2. 979825846 | 0. 367 | 0. 985 | 1. 57E-45 Platelets | RPS3     |
| 5. 51E-50 | -3. 191290777 | 0. 233 | 0. 983 | 1. 86E-45 Platelets | RPS25    |
| 6. 23E-50 | 2. 26529526   | 0. 611 | 0. 138 | 2. 10E-45 Platelets | AKIRIN2  |
| 6. 82E-50 | -3. 135208777 | 0. 322 | 0. 986 | 2. 30E-45 Platelets | RPL39    |
| 8. 19E-50 | -3. 120891178 | 0. 189 | 0. 976 | 2. 76E-45 Platelets | RPL36    |
| 8. 56E-50 | -3. 251592219 | 0. 178 | 0. 986 | 2. 88E-45 Platelets | RPL18A   |

|           |               |        |        |                     |              |
|-----------|---------------|--------|--------|---------------------|--------------|
| 1. 26E-49 | -2. 985691493 | 0. 211 | 0. 977 | 4. 25E-45 Platelets | RPL27        |
| 2. 27E-49 | 1. 99880226   | 0. 467 | 0. 077 | 7. 65E-45 Platelets | TACC3        |
| 2. 45E-49 | -3. 224504457 | 0. 156 | 0. 965 | 8. 24E-45 Platelets | RPL5         |
| 4. 03E-49 | -2. 929189515 | 0. 211 | 0. 967 | 1. 36E-44 Platelets | RPL7A        |
| 5. 47E-49 | 2. 266026782  | 0. 544 | 0. 108 | 1. 84E-44 Platelets | RDH11        |
| 6. 34E-49 | -3. 081529993 | 0. 122 | 0. 97  | 2. 14E-44 Platelets | RPS21        |
| 6. 57E-49 | 2. 220203007  | 1      | 0. 974 | 2. 21E-44 Platelets | FTH1         |
| 7. 12E-49 | 2. 499570568  | 0. 878 | 0. 401 | 2. 40E-44 Platelets | ARF1         |
| 8. 57E-49 | -3. 104402597 | 0. 144 | 0. 974 | 2. 89E-44 Platelets | RPL10A       |
| 9. 44E-49 | -2. 940206334 | 0. 222 | 0. 978 | 3. 18E-44 Platelets | RPS7         |
| 1. 04E-48 | 1. 353464205  | 0. 256 | 0. 023 | 3. 49E-44 Platelets | TRIM58       |
| 1. 17E-48 | 1. 962362415  | 0. 311 | 0. 034 | 3. 95E-44 Platelets | FRMD4B       |
| 1. 81E-48 | -2. 689460338 | 0. 433 | 0. 978 | 6. 09E-44 Platelets | RPS20        |
| 1. 99E-48 | -3. 213532125 | 0. 111 | 0. 955 | 6. 69E-44 Platelets | RPSA         |
| 2. 13E-48 | -3. 214557285 | 0. 467 | 0. 995 | 7. 19E-44 Platelets | MALAT1       |
| 3. 04E-48 | -2. 426122082 | 0. 678 | 0. 99  | 1. 03E-43 Platelets | TPT1         |
| 4. 08E-48 | 2. 44525962   | 0. 956 | 0. 584 | 1. 37E-43 Platelets | MTRNR2L12    |
| 5. 44E-48 | -2. 774720283 | 0. 278 | 0. 98  | 1. 83E-43 Platelets | RPL6         |
| 6. 27E-48 | 2. 590020367  | 0. 678 | 0. 189 | 2. 11E-43 Platelets | VDAC3        |
| 6. 28E-48 | 2. 303391284  | 0. 989 | 0. 852 | 2. 12E-43 Platelets | ITM2B        |
| 7. 53E-48 | -3. 280702749 | 0. 2   | 0. 944 | 2. 54E-43 Platelets | RPS26        |
| 1. 00E-47 | 2. 540986006  | 0. 611 | 0. 144 | 3. 38E-43 Platelets | H2AFJ        |
| 1. 33E-47 | -2. 802810325 | 0. 211 | 0. 974 | 4. 49E-43 Platelets | RPL38        |
| 1. 35E-47 | 2. 287532462  | 0. 422 | 0. 065 | 4. 55E-43 Platelets | RP6-159A1. 4 |
| 3. 19E-47 | -2. 962371947 | 0. 144 | 0. 958 | 1. 08E-42 Platelets | RPL22        |
| 5. 77E-47 | 1. 745070867  | 0. 489 | 0. 088 | 1. 94E-42 Platelets | CYB5R3       |
| 1. 24E-46 | 2. 009467954  | 0. 556 | 0. 113 | 4. 17E-42 Platelets | CD68         |
| 1. 30E-46 | 2. 221201963  | 0. 989 | 0. 701 | 4. 38E-42 Platelets | ARPC1B       |
| 1. 41E-46 | 2. 096183976  | 0. 489 | 0. 089 | 4. 75E-42 Platelets | UBXN11       |
| 1. 80E-46 | -2. 507799312 | 0. 356 | 0. 976 | 6. 06E-42 Platelets | RPS11        |
| 3. 78E-46 | 1. 472834838  | 0. 311 | 0. 036 | 1. 27E-41 Platelets | CLCN3        |
| 5. 19E-46 | -2. 633298107 | 0. 167 | 0. 947 | 1. 75E-41 Platelets | EEF1D        |
| 5. 64E-46 | 2. 443842062  | 0. 933 | 0. 569 | 1. 90E-41 Platelets | ARPC5        |
| 7. 20E-46 | -2. 575105983 | 0. 244 | 0. 968 | 2. 43E-41 Platelets | GNB2L1       |
| 8. 10E-46 | 2. 42736459   | 0. 833 | 0. 342 | 2. 73E-41 Platelets | TALDO1       |
| 8. 33E-46 | 1. 477749529  | 0. 344 | 0. 044 | 2. 81E-41 Platelets | CENPT        |
| 8. 57E-46 | -2. 745390299 | 0. 189 | 0. 958 | 2. 89E-41 Platelets | RPL23        |
| 8. 58E-46 | 1. 962485625  | 0. 544 | 0. 113 | 2. 89E-41 Platelets | TUBB4B       |
| 8. 63E-46 | -2. 026023153 | 0. 567 | 0. 984 | 2. 91E-41 Platelets | FAU          |
| 1. 61E-45 | -2. 006541392 | 0. 544 | 0. 991 | 5. 44E-41 Platelets | UBA52        |
| 1. 62E-45 | -2. 460417434 | 0. 278 | 0. 959 | 5. 45E-41 Platelets | NACA         |
| 2. 41E-45 | 2. 057832061  | 0. 978 | 0. 781 | 8. 13E-41 Platelets | MTRNR2L8     |
| 2. 72E-45 | -3. 042175849 | 0. 133 | 0. 935 | 9. 16E-41 Platelets | CD52         |
| 3. 41E-45 | 2. 65697527   | 1      | 0. 987 | 1. 15E-40 Platelets | ACTB         |
| 5. 24E-45 | -2. 006365704 | 0. 7   | 0. 987 | 1. 76E-40 Platelets | RPL35A       |
| 9. 12E-45 | 1. 997688112  | 0. 567 | 0. 126 | 3. 07E-40 Platelets | LEPROT       |
| 1. 37E-44 | -2. 826390592 | 0. 144 | 0. 941 | 4. 61E-40 Platelets | RPLP0        |
| 2. 26E-44 | -1. 913756631 | 0. 722 | 0. 984 | 7. 62E-40 Platelets | RPL15        |
| 4. 47E-44 | 2. 30923739   | 0. 389 | 0. 059 | 1. 51E-39 Platelets | FAM110A      |
| 6. 42E-44 | -2. 5642355   | 0. 167 | 0. 948 | 2. 16E-39 Platelets | PFDN5        |
| 6. 66E-44 | 2. 495516288  | 0. 944 | 0. 63  | 2. 24E-39 Platelets | SRGN         |

|           |               |        |        |                     |           |
|-----------|---------------|--------|--------|---------------------|-----------|
| 1. 58E-43 | 2. 349015095  | 0. 567 | 0. 134 | 5. 32E-39 Platelets | KIF2A     |
| 2. 39E-43 | 2. 220925078  | 0. 656 | 0. 185 | 8. 05E-39 Platelets | PDCD10    |
| 2. 16E-42 | 2. 173228388  | 0. 622 | 0. 165 | 7. 28E-38 Platelets | CAPN1     |
| 2. 60E-42 | 1. 768178076  | 0. 311 | 0. 039 | 8. 77E-38 Platelets | AIG1      |
| 4. 70E-42 | 2. 306507182  | 0. 511 | 0. 106 | 1. 58E-37 Platelets | ZCCHC17   |
| 1. 58E-41 | 2. 480432032  | 0. 733 | 0. 258 | 5. 31E-37 Platelets | RAP1B     |
| 2. 13E-41 | -2. 686471378 | 0. 144 | 0. 901 | 7. 18E-37 Platelets | EEF1B2    |
| 5. 07E-41 | 1. 612083955  | 0. 367 | 0. 055 | 1. 71E-36 Platelets | HDGF      |
| 5. 33E-41 | -2. 73102809  | 0. 089 | 0. 882 | 1. 80E-36 Platelets | NBEAL1    |
| 1. 20E-40 | 1. 699163633  | 0. 344 | 0. 049 | 4. 05E-36 Platelets | TMEM55A   |
| 1. 91E-40 | 2. 067214133  | 0. 533 | 0. 12  | 6. 43E-36 Platelets | ADIPOR1   |
| 5. 43E-40 | -2. 259812803 | 0. 222 | 0. 909 | 1. 83E-35 Platelets | COX7C     |
| 1. 80E-39 | 1. 996974069  | 0. 556 | 0. 137 | 6. 05E-35 Platelets | SPINT2    |
| 2. 07E-39 | 2. 202007031  | 0. 6   | 0. 164 | 6. 97E-35 Platelets | SOD2      |
| 2. 34E-39 | -2. 780939064 | 0. 078 | 0. 838 | 7. 88E-35 Platelets | NPM1      |
| 3. 85E-39 | 2. 297609011  | 0. 756 | 0. 276 | 1. 30E-34 Platelets | ITGB1     |
| 3. 93E-39 | -2. 262714049 | 0. 2   | 0. 914 | 1. 32E-34 Platelets | TOMM7     |
| 5. 01E-39 | 2. 300745007  | 0. 744 | 0. 283 | 1. 69E-34 Platelets | MTPN      |
| 7. 26E-39 | 1. 934341824  | 0. 9   | 0. 526 | 2. 45E-34 Platelets | MTRNR2L10 |
| 8. 91E-39 | -2. 467477545 | 0. 111 | 0. 868 | 3. 00E-34 Platelets | HNRNPA1   |
| 6. 87E-38 | 2. 432239132  | 0. 722 | 0. 273 | 2. 32E-33 Platelets | DNAJB6    |
| 9. 19E-38 | -2. 115176733 | 0. 211 | 0. 921 | 3. 10E-33 Platelets | BTF3      |
| 1. 24E-37 | 2. 115180028  | 0. 689 | 0. 238 | 4. 19E-33 Platelets | NDUFA6    |
| 1. 95E-37 | -2. 421077956 | 0. 133 | 0. 871 | 6. 58E-33 Platelets | EEF2      |
| 2. 58E-37 | 1. 968954626  | 0. 511 | 0. 12  | 8. 71E-33 Platelets | PYCR2     |
| 3. 95E-37 | 1. 450431203  | 0. 356 | 0. 056 | 1. 33E-32 Platelets | RIT1      |
| 8. 61E-37 | -2. 346066572 | 0. 156 | 0. 888 | 2. 90E-32 Platelets | RPS10     |
| 9. 73E-37 | 1. 954708371  | 0. 589 | 0. 166 | 3. 28E-32 Platelets | CAMTA1    |
| 2. 25E-36 | 2. 102560833  | 0. 622 | 0. 19  | 7. 59E-32 Platelets | NUTF2     |
| 4. 00E-36 | 2. 640987339  | 0. 978 | 0. 887 | 1. 35E-31 Platelets | MYL6      |
| 4. 23E-36 | 2. 156687628  | 0. 556 | 0. 148 | 1. 42E-31 Platelets | UBAC2     |
| 4. 32E-36 | -2. 544286648 | 0. 078 | 0. 817 | 1. 46E-31 Platelets | GLTSCR2   |
| 6. 99E-36 | -2. 373632414 | 0. 056 | 0. 829 | 2. 36E-31 Platelets | SLC25A6   |
| 1. 29E-35 | 1. 554388939  | 0. 367 | 0. 062 | 4. 33E-31 Platelets | PPM1A     |
| 1. 77E-35 | 1. 479468736  | 0. 978 | 0. 888 | 5. 96E-31 Platelets | HLA-E     |
| 2. 32E-35 | 2. 308945024  | 0. 744 | 0. 308 | 7. 82E-31 Platelets | LAT       |
| 2. 66E-35 | -2. 03661433  | 0. 222 | 0. 916 | 8. 96E-31 Platelets | TXNIP     |
| 3. 12E-35 | 1. 592501932  | 0. 333 | 0. 053 | 1. 05E-30 Platelets | DERA      |
| 4. 06E-35 | 2. 146859354  | 0. 678 | 0. 239 | 1. 37E-30 Platelets | ICAM2     |
| 2. 03E-34 | 1. 849005997  | 0. 478 | 0. 111 | 6. 83E-30 Platelets | MAGED2    |
| 2. 24E-34 | 1. 981415892  | 0. 7   | 0. 263 | 7. 56E-30 Platelets | TGFB1     |
| 2. 31E-34 | -2. 187814603 | 0. 167 | 0. 869 | 7. 78E-30 Platelets | CORO1A    |
| 3. 31E-34 | 2. 019511555  | 0. 522 | 0. 135 | 1. 11E-29 Platelets | R3HDM4    |
| 4. 18E-34 | 2. 126976368  | 0. 656 | 0. 22  | 1. 41E-29 Platelets | ASAH1     |
| 5. 48E-34 | -2. 270776681 | 0. 1   | 0. 824 | 1. 85E-29 Platelets | EIF3E     |
| 5. 84E-34 | 2. 056770697  | 0. 7   | 0. 262 | 1. 97E-29 Platelets | WDR1      |
| 6. 71E-34 | 1. 758047307  | 0. 6   | 0. 18  | 2. 26E-29 Platelets | RAB8A     |
| 7. 27E-34 | -2. 190103979 | 0. 1   | 0. 825 | 2. 45E-29 Platelets | COMMD6    |
| 8. 07E-34 | 1. 438087415  | 0. 322 | 0. 051 | 2. 72E-29 Platelets | TM2D2     |
| 1. 23E-33 | 2. 184681725  | 0. 644 | 0. 207 | 4. 14E-29 Platelets | PLEK      |
| 1. 93E-33 | 2. 088486336  | 0. 922 | 0. 7   | 6. 50E-29 Platelets | PPDPF     |

|           |               |        |        |                     |           |
|-----------|---------------|--------|--------|---------------------|-----------|
| 1. 96E-33 | 1. 931210411  | 0. 878 | 0. 613 | 6. 61E-29 Platelets | UQCRH     |
| 4. 65E-33 | 2. 136730544  | 0. 811 | 0. 408 | 1. 57E-28 Platelets | FKBP1A    |
| 8. 72E-33 | 1. 817757453  | 0. 689 | 0. 237 | 2. 94E-28 Platelets | STXBP2    |
| 2. 15E-32 | -2. 132630575 | 0. 156 | 0. 834 | 7. 23E-28 Platelets | RPL36A    |
| 4. 86E-32 | 1. 336013046  | 0. 278 | 0. 04  | 1. 64E-27 Platelets | PACSIN2   |
| 5. 37E-32 | 1. 75938824   | 0. 856 | 0. 5   | 1. 81E-27 Platelets | YWHAZ     |
| 5. 43E-32 | -2. 141365696 | 0. 1   | 0. 808 | 1. 83E-27 Platelets | HINT1     |
| 5. 48E-32 | 1. 518134803  | 0. 311 | 0. 05  | 1. 85E-27 Platelets | CDIP1     |
| 6. 10E-32 | -2. 524808149 | 0. 133 | 0. 841 | 2. 06E-27 Platelets | S100A6    |
| 1. 63E-31 | 2. 009262548  | 0. 544 | 0. 16  | 5. 49E-27 Platelets | HACD4     |
| 2. 01E-31 | 2. 254981302  | 0. 511 | 0. 14  | 6. 77E-27 Platelets | RSU1      |
| 2. 01E-31 | 1. 985008511  | 0. 733 | 0. 347 | 6. 77E-27 Platelets | TMEM50A   |
| 3. 03E-31 | 1. 684991988  | 0. 289 | 0. 044 | 1. 02E-26 Platelets | PTGIR     |
| 6. 09E-31 | 1. 560565963  | 0. 322 | 0. 055 | 2. 05E-26 Platelets | DAAM1     |
| 9. 51E-31 | 1. 880269132  | 0. 489 | 0. 123 | 3. 20E-26 Platelets | CD36      |
| 1. 39E-30 | -2. 387728688 | 0. 222 | 0. 857 | 4. 69E-26 Platelets | CYBA      |
| 1. 83E-30 | -2. 152779576 | 0. 367 | 0. 067 | 6. 18E-26 Platelets | HBA1      |
| 2. 85E-30 | 1. 747036073  | 0. 778 | 0. 385 | 9. 59E-26 Platelets | EIF4G2    |
| 7. 71E-30 | 2. 082064515  | 0. 811 | 0. 477 | 2. 60E-25 Platelets | RBX1      |
| 8. 04E-30 | -1. 052532525 | 0. 911 | 0. 99  | 2. 71E-25 Platelets | MT-CO3    |
| 2. 66E-29 | -1. 700940769 | 0. 3   | 0. 885 | 8. 96E-25 Platelets | UQCRB     |
| 3. 78E-29 | -1. 480846237 | 0. 589 | 0. 948 | 1. 27E-24 Platelets | RPL4      |
| 8. 06E-29 | -1. 940449552 | 0. 122 | 0. 793 | 2. 71E-24 Platelets | ATP5G2    |
| 1. 01E-28 | -2. 014548387 | 0. 067 | 0. 742 | 3. 41E-24 Platelets | PTPRC     |
| 1. 58E-28 | 1. 870029606  | 0. 578 | 0. 2   | 5. 34E-24 Platelets | IFI27L2   |
| 1. 88E-28 | -1. 567150765 | 0. 367 | 0. 909 | 6. 33E-24 Platelets | COX4I1    |
| 2. 31E-28 | -2. 008377919 | 0. 1   | 0. 779 | 7. 77E-24 Platelets | RPL17     |
| 2. 84E-28 | 2. 121850807  | 0. 567 | 0. 193 | 9. 57E-24 Platelets | SVIP      |
| 3. 31E-28 | 1. 307796266  | 0. 267 | 0. 041 | 1. 12E-23 Platelets | ZFYVE21   |
| 3. 97E-28 | 1. 442290196  | 0. 356 | 0. 072 | 1. 34E-23 Platelets | MPST      |
| 4. 63E-28 | 1. 589885792  | 0. 456 | 0. 115 | 1. 56E-23 Platelets | LINC00657 |
| 5. 32E-28 | -2. 232165447 | 0. 156 | 0. 777 | 1. 79E-23 Platelets | BTG1      |
| 1. 04E-27 | 1. 689971647  | 0. 333 | 0. 065 | 3. 49E-23 Platelets | BET1      |
| 1. 40E-27 | -2. 025714648 | 0. 078 | 0. 724 | 4. 73E-23 Platelets | CD48      |
| 1. 43E-27 | 1. 32492272   | 0. 267 | 0. 042 | 4. 83E-23 Platelets | MTFR1L    |
| 1. 97E-27 | -1. 923099461 | 0. 1   | 0. 745 | 6. 65E-23 Platelets | EIF3K     |
| 2. 83E-27 | -2. 758538049 | 0. 167 | 0. 779 | 9. 53E-23 Platelets | S100A4    |
| 3. 98E-27 | -1. 714004983 | 0. 211 | 0. 849 | 1. 34E-22 Platelets | DDX5      |
| 4. 01E-27 | -1. 601512142 | 0. 333 | 0. 889 | 1. 35E-22 Platelets | RPL36AL   |
| 4. 58E-27 | -2. 167093458 | 0. 156 | 0. 765 | 1. 54E-22 Platelets | VIM       |
| 6. 95E-27 | 1. 833104205  | 0. 456 | 0. 124 | 2. 34E-22 Platelets | RABGAP1L  |
| 7. 19E-27 | 1. 23224197   | 0. 256 | 0. 039 | 2. 42E-22 Platelets | AGPAT1    |
| 2. 43E-26 | -1. 93367796  | 0. 122 | 0. 758 | 8. 19E-22 Platelets | HSPA8     |
| 3. 62E-26 | 1. 780124312  | 0. 411 | 0. 105 | 1. 22E-21 Platelets | RIOK3     |
| 4. 70E-26 | 1. 975062297  | 0. 389 | 0. 092 | 1. 58E-21 Platelets | ERV3-1    |
| 5. 07E-26 | -1. 877942444 | 0. 067 | 0. 703 | 1. 71E-21 Platelets | SNRPD2    |
| 5. 91E-26 | -1. 928219852 | 0. 067 | 0. 687 | 1. 99E-21 Platelets | EIF3F     |
| 9. 97E-26 | 1. 872299573  | 0. 444 | 0. 124 | 3. 36E-21 Platelets | LIPA      |
| 1. 20E-25 | 1. 492525104  | 0. 356 | 0. 078 | 4. 05E-21 Platelets | CERS2     |
| 2. 27E-25 | -2. 98903541  | 0. 078 | 0. 674 | 7. 64E-21 Platelets | LTB       |
| 2. 73E-25 | 1. 735813492  | 0. 778 | 0. 486 | 9. 21E-21 Platelets | SNX3      |

|          |              |       |       |                    |           |
|----------|--------------|-------|-------|--------------------|-----------|
| 3.34E-25 | 1.776242236  | 0.478 | 0.146 | 1.12E-20 Platelets | RAB4A     |
| 4.96E-25 | 1.711312625  | 0.489 | 0.148 | 1.67E-20 Platelets | ZYX       |
| 5.35E-25 | 1.645279144  | 0.767 | 0.444 | 1.80E-20 Platelets | CD99      |
| 5.42E-25 | 1.870466893  | 0.767 | 0.464 | 1.83E-20 Platelets | BIN2      |
| 7.43E-25 | 1.804035093  | 0.6   | 0.238 | 2.50E-20 Platelets | MYH9      |
| 9.27E-25 | 1.785494915  | 0.478 | 0.143 | 3.12E-20 Platelets | RTN3      |
| 1.49E-24 | 1.941667805  | 0.567 | 0.217 | 5.02E-20 Platelets | ATF4      |
| 1.82E-24 | 1.774703065  | 0.533 | 0.187 | 6.13E-20 Platelets | PIP4K2A   |
| 1.82E-24 | -2.297612002 | 0.078 | 0.671 | 6.13E-20 Platelets | IFITM2    |
| 2.02E-24 | 1.664073666  | 0.622 | 0.256 | 6.81E-20 Platelets | VASP      |
| 2.28E-24 | 1.233750373  | 0.356 | 0.078 | 7.68E-20 Platelets | MAPRE2    |
| 2.53E-24 | 1.884397892  | 0.767 | 0.458 | 8.54E-20 Platelets | C9orf16   |
| 3.46E-24 | 1.717997334  | 0.733 | 0.41  | 1.17E-19 Platelets | GABARAPL2 |
| 4.68E-24 | 1.427835574  | 0.889 | 0.763 | 1.58E-19 Platelets | HMGB1     |
| 4.71E-24 | 1.336956278  | 0.967 | 0.953 | 1.59E-19 Platelets | SERF2     |
| 5.76E-24 | 1.40076151   | 0.3   | 0.06  | 1.94E-19 Platelets | UBL4A     |
| 6.67E-24 | 1.329714643  | 0.3   | 0.059 | 2.25E-19 Platelets | CYB5R1    |
| 8.47E-24 | 1.774693387  | 0.589 | 0.24  | 2.85E-19 Platelets | MOB1A     |
| 8.89E-24 | 1.237470807  | 0.956 | 0.848 | 2.99E-19 Platelets | GAPDH     |
| 1.07E-23 | -1.713353224 | 0.167 | 0.752 | 3.60E-19 Platelets | SRSF5     |
| 1.09E-23 | 1.675837923  | 0.467 | 0.145 | 3.67E-19 Platelets | LDLRAP1   |
| 1.26E-23 | 1.67779991   | 0.644 | 0.293 | 4.25E-19 Platelets | TMEM219   |
| 1.68E-23 | 1.783333001  | 0.522 | 0.183 | 5.66E-19 Platelets | RHEB      |
| 1.87E-23 | 1.815030169  | 0.611 | 0.261 | 6.31E-19 Platelets | FLNA      |
| 2.29E-23 | 1.35622811   | 0.278 | 0.053 | 7.71E-19 Platelets | C7orf49   |
| 2.63E-23 | -1.788465117 | 0.078 | 0.683 | 8.85E-19 Platelets | PSME1     |
| 3.24E-23 | 1.737657862  | 0.789 | 0.531 | 1.09E-18 Platelets | TPM3      |
| 5.20E-23 | -1.788200197 | 0.1   | 0.691 | 1.75E-18 Platelets | LIMD2     |
| 1.42E-22 | 1.980486144  | 0.556 | 0.221 | 4.78E-18 Platelets | CCNG1     |
| 1.47E-22 | 1.125319595  | 0.911 | 0.674 | 4.96E-18 Platelets | ALDOA     |
| 2.18E-22 | -1.831538635 | 0.067 | 0.642 | 7.35E-18 Platelets | ZNF90     |
| 3.03E-22 | 1.732369044  | 0.333 | 0.078 | 1.02E-17 Platelets | INSIG1    |
| 4.22E-22 | 1.132483836  | 0.956 | 0.886 | 1.42E-17 Platelets | ARHGDI1B  |
| 4.96E-22 | -1.931982823 | 0.089 | 0.653 | 1.67E-17 Platelets | GIMAP7    |
| 5.95E-22 | 1.513425904  | 0.622 | 0.27  | 2.00E-17 Platelets | DOK2      |
| 7.95E-22 | 1.599674112  | 0.322 | 0.074 | 2.68E-17 Platelets | PPP1R15A  |
| 8.54E-22 | 1.515517301  | 0.767 | 0.535 | 2.88E-17 Platelets | NDUFS5    |
| 9.00E-22 | 1.804756246  | 0.511 | 0.188 | 3.03E-17 Platelets | YWHAE     |
| 1.19E-21 | 1.201789975  | 0.256 | 0.047 | 4.01E-17 Platelets | CASP3     |
| 1.51E-21 | 1.781712273  | 0.367 | 0.096 | 5.09E-17 Platelets | TBPL1     |
| 2.08E-21 | -1.718956538 | 0.156 | 0.737 | 7.02E-17 Platelets | CD37      |
| 2.81E-21 | 1.664923198  | 0.778 | 0.515 | 9.46E-17 Platelets | TSC22D3   |
| 3.85E-21 | -1.742566769 | 0.056 | 0.613 | 1.30E-16 Platelets | EIF3L     |
| 6.25E-21 | -1.437177733 | 0.122 | 0.7   | 2.10E-16 Platelets | EDF1      |
| 6.73E-21 | 1.548915506  | 0.444 | 0.142 | 2.27E-16 Platelets | SECISBP2  |
| 1.30E-20 | -1.921371327 | 0.078 | 0.632 | 4.39E-16 Platelets | S100A10   |
| 1.68E-20 | -2.579645113 | 0.044 | 0.599 | 5.66E-16 Platelets | IL32      |
| 1.69E-20 | -1.776899627 | 0.078 | 0.602 | 5.71E-16 Platelets | HSP90AB1  |
| 1.81E-20 | 1.367156569  | 0.789 | 0.579 | 6.11E-16 Platelets | ARL6IP5   |
| 1.86E-20 | -1.565969102 | 0.089 | 0.639 | 6.28E-16 Platelets | SSR2      |
| 2.17E-20 | -1.755370872 | 0.067 | 0.608 | 7.31E-16 Platelets | RAC2      |

|           |               |        |        |                     |             |
|-----------|---------------|--------|--------|---------------------|-------------|
| 2. 23E-20 | 1. 28242789   | 0. 256 | 0. 05  | 7. 50E-16 Platelets | DHRS3       |
| 2. 73E-20 | -1. 751262325 | 0. 044 | 0. 584 | 9. 20E-16 Platelets | TRAF3IP3    |
| 2. 91E-20 | -1. 656618744 | 0. 078 | 0. 631 | 9. 81E-16 Platelets | PNISR       |
| 3. 11E-20 | 1. 314195248  | 0. 267 | 0. 054 | 1. 05E-15 Platelets | BTK         |
| 4. 34E-20 | -1. 800236539 | 0. 056 | 0. 588 | 1. 46E-15 Platelets | LSP1        |
| 6. 40E-20 | 1. 636477812  | 0. 789 | 0. 569 | 2. 16E-15 Platelets | CLIC1       |
| 6. 65E-20 | 1. 546146221  | 0. 5   | 0. 185 | 2. 24E-15 Platelets | BNIP2       |
| 1. 03E-19 | 1. 513443189  | 0. 3   | 0. 071 | 3. 48E-15 Platelets | SLC39A3     |
| 1. 09E-19 | -2. 099822477 | 0. 044 | 0. 573 | 3. 68E-15 Platelets | ITGB2       |
| 1. 20E-19 | 1. 781230599  | 0. 556 | 0. 249 | 4. 04E-15 Platelets | SQSTM1      |
| 1. 34E-19 | 1. 4829318    | 0. 622 | 0. 309 | 4. 52E-15 Platelets | SERPINB1    |
| 1. 45E-19 | 1. 416368555  | 0. 322 | 0. 08  | 4. 88E-15 Platelets | ITFG1       |
| 1. 67E-19 | -1. 718430476 | 0. 033 | 0. 555 | 5. 63E-15 Platelets | HNRNPDL     |
| 1. 70E-19 | 1. 14578599   | 0. 256 | 0. 052 | 5. 72E-15 Platelets | IKBK        |
| 2. 55E-19 | 1. 195903771  | 0. 889 | 0. 752 | 8. 60E-15 Platelets | CALM1       |
| 2. 87E-19 | -2. 366205561 | 0. 056 | 0. 575 | 9. 67E-15 Platelets | TRAC        |
| 3. 01E-19 | -1. 566963911 | 0. 122 | 0. 639 | 1. 01E-14 Platelets | EIF3H       |
| 3. 67E-19 | -1. 756813035 | 0. 044 | 0. 555 | 1. 24E-14 Platelets | TIPIN       |
| 4. 17E-19 | 1. 82688313   | 0. 389 | 0. 119 | 1. 40E-14 Platelets | RAP2B       |
| 4. 71E-19 | 1. 531431917  | 0. 4   | 0. 125 | 1. 59E-14 Platelets | ISCA1       |
| 5. 70E-19 | 1. 705908752  | 0. 522 | 0. 213 | 1. 92E-14 Platelets | RHOF        |
| 6. 91E-19 | -1. 870583478 | 0. 078 | 0. 588 | 2. 33E-14 Platelets | AC090498. 1 |
| 8. 05E-19 | -1. 744847208 | 0. 167 | 0. 679 | 2. 71E-14 Platelets | LDHB        |
| 1. 00E-18 | -1. 657055368 | 0. 044 | 0. 541 | 3. 39E-14 Platelets | RAN         |
| 1. 03E-18 | -1. 571928073 | 0. 078 | 0. 594 | 3. 45E-14 Platelets | APRT        |
| 1. 40E-18 | -1. 685175858 | 0. 133 | 0. 637 | 4. 71E-14 Platelets | NHSL2       |
| 1. 49E-18 | 1. 380549368  | 0. 933 | 0. 87  | 5. 03E-14 Platelets | ACTG1       |
| 1. 57E-18 | -1. 385325052 | 0. 211 | 0. 746 | 5. 29E-14 Platelets | LAPTM5      |
| 3. 34E-18 | 1. 82849087   | 0. 433 | 0. 155 | 1. 13E-13 Platelets | RAB10       |
| 3. 79E-18 | -1. 680132421 | 0. 033 | 0. 534 | 1. 28E-13 Platelets | CD53        |
| 4. 06E-18 | 1. 326159336  | 0. 289 | 0. 07  | 1. 37E-13 Platelets | ARMCX6      |
| 6. 08E-18 | 1. 703806643  | 0. 678 | 0. 398 | 2. 05E-13 Platelets | TUBA1B      |
| 6. 69E-18 | 1. 408870887  | 0. 289 | 0. 07  | 2. 26E-13 Platelets | GNB5        |
| 7. 75E-18 | -1. 500418153 | 0. 078 | 0. 585 | 2. 61E-13 Platelets | EIF3G       |
| 9. 02E-18 | 1. 480498385  | 0. 567 | 0. 268 | 3. 04E-13 Platelets | EIF1B       |
| 1. 63E-17 | 1. 65389195   | 0. 633 | 0. 359 | 5. 49E-13 Platelets | CCDC85B     |
| 1. 71E-17 | -3. 088387737 | 0. 144 | 0. 615 | 5. 75E-13 Platelets | CD74        |
| 2. 04E-17 | -2. 182324274 | 0. 033 | 0. 508 | 6. 88E-13 Platelets | TRBC2       |
| 2. 17E-17 | -1. 319745823 | 0. 189 | 0. 706 | 7. 30E-13 Platelets | CHCHD2      |
| 2. 17E-17 | 1. 496283192  | 0. 422 | 0. 15  | 7. 32E-13 Platelets | ARF4        |
| 2. 32E-17 | 1. 318494653  | 0. 389 | 0. 127 | 7. 83E-13 Platelets | N4BP2L1     |
| 2. 37E-17 | 1. 286008451  | 0. 322 | 0. 088 | 7. 98E-13 Platelets | CCPG1       |
| 3. 68E-17 | -1. 671481724 | 0. 056 | 0. 539 | 1. 24E-12 Platelets | GIMAP4      |
| 4. 48E-17 | -1. 607250244 | 0. 044 | 0. 532 | 1. 51E-12 Platelets | CLEC2D      |
| 4. 50E-17 | -1. 521097305 | 0. 056 | 0. 544 | 1. 52E-12 Platelets | ARL6IP4     |
| 4. 89E-17 | -1. 33113829  | 0. 144 | 0. 664 | 1. 65E-12 Platelets | COX7A2      |
| 4. 90E-17 | -1. 460007096 | 0. 111 | 0. 596 | 1. 65E-12 Platelets | ERP29       |
| 6. 13E-17 | -1. 503765436 | 0. 089 | 0. 569 | 2. 07E-12 Platelets | ANAPC16     |
| 6. 71E-17 | 1. 298171361  | 0. 289 | 0. 073 | 2. 26E-12 Platelets | RAB37       |
| 6. 94E-17 | 1. 546835077  | 0. 489 | 0. 212 | 2. 34E-12 Platelets | GNAS        |
| 7. 14E-17 | 1. 283160672  | 0. 756 | 0. 545 | 2. 40E-12 Platelets | CAPZB       |



|          |              |       |       |                    |            |
|----------|--------------|-------|-------|--------------------|------------|
| 7.38E-17 | 1.661129783  | 0.611 | 0.339 | 2.49E-12 Platelets | CD47       |
| 7.63E-17 | 1.582754701  | 0.378 | 0.123 | 2.57E-12 Platelets | MAP2K3     |
| 8.41E-17 | -1.608755471 | 0.044 | 0.513 | 2.84E-12 Platelets | EVI2B      |
| 8.80E-17 | 1.232649905  | 0.322 | 0.091 | 2.97E-12 Platelets | HK1        |
| 1.21E-16 | 1.777899287  | 0.656 | 0.409 | 4.08E-12 Platelets | SH3BGRL    |
| 1.31E-16 | -1.502940967 | 0.056 | 0.53  | 4.42E-12 Platelets | HIGD2A     |
| 1.36E-16 | 1.457780454  | 0.611 | 0.333 | 4.59E-12 Platelets | SELT       |
| 1.59E-16 | 2.167225352  | 0.522 | 0.247 | 5.36E-12 Platelets | RASGRP2    |
| 1.74E-16 | 1.077348403  | 0.267 | 0.064 | 5.85E-12 Platelets | NUTM2A-AS1 |
| 2.04E-16 | 1.352483771  | 0.289 | 0.075 | 6.87E-12 Platelets | SEC14L1    |
| 2.10E-16 | -1.912318059 | 0.067 | 0.543 | 7.07E-12 Platelets | CD3D       |
| 3.48E-16 | -1.890701895 | 0.056 | 0.515 | 1.17E-11 Platelets | PLAC8      |
| 3.84E-16 | 1.426753485  | 0.444 | 0.164 | 1.29E-11 Platelets | RHOC       |
| 3.91E-16 | -1.405724594 | 0.056 | 0.532 | 1.32E-11 Platelets | CNBP       |
| 4.10E-16 | 1.415469688  | 0.433 | 0.164 | 1.38E-11 Platelets | CMPK1      |
| 4.13E-16 | 1.271948363  | 0.389 | 0.135 | 1.39E-11 Platelets | SUSD3      |
| 5.20E-16 | -1.772615073 | 0.067 | 0.529 | 1.75E-11 Platelets | ANXA1      |
| 5.68E-16 | 1.216897751  | 0.333 | 0.099 | 1.91E-11 Platelets | GNAQ       |
| 5.89E-16 | 1.206587946  | 0.344 | 0.105 | 1.98E-11 Platelets | ARF3       |
| 6.32E-16 | -1.503754921 | 0.067 | 0.525 | 2.13E-11 Platelets | MIF        |
| 7.64E-16 | -1.482139876 | 0.056 | 0.51  | 2.57E-11 Platelets | RBM3       |
| 1.40E-15 | 1.458485135  | 0.411 | 0.154 | 4.71E-11 Platelets | ABI1       |
| 1.64E-15 | -1.5726837   | 0.056 | 0.495 | 5.54E-11 Platelets | CD44       |
| 2.00E-15 | -1.759862065 | 0.044 | 0.491 | 6.75E-11 Platelets | CD3E       |
| 2.04E-15 | 1.342785571  | 0.422 | 0.163 | 6.87E-11 Platelets | RILPL2     |
| 2.24E-15 | 1.215832934  | 0.278 | 0.073 | 7.56E-11 Platelets | SSBP2      |
| 2.48E-15 | 1.945216616  | 0.5   | 0.24  | 8.35E-11 Platelets | NDUFAF3    |
| 2.84E-15 | -1.271685505 | 0.222 | 0.677 | 9.58E-11 Platelets | YBX1       |
| 4.36E-15 | -1.532444874 | 0.078 | 0.508 | 1.47E-10 Platelets | AES        |
| 4.58E-15 | -1.41280881  | 0.067 | 0.515 | 1.54E-10 Platelets | SEC62      |
| 4.85E-15 | -1.654222941 | 0.056 | 0.507 | 1.63E-10 Platelets | TSPO       |
| 5.37E-15 | -1.416805393 | 0.089 | 0.535 | 1.81E-10 Platelets | C6orf48    |
| 5.75E-15 | -1.378298509 | 0.067 | 0.514 | 1.94E-10 Platelets | NDUFB2     |
| 5.77E-15 | -1.462655093 | 0.044 | 0.471 | 1.94E-10 Platelets | TBCA       |
| 6.57E-15 | -1.426269115 | 0.033 | 0.469 | 2.21E-10 Platelets | EIF3D      |
| 7.65E-15 | 1.385509377  | 0.6   | 0.352 | 2.58E-10 Platelets | VAPA       |
| 7.87E-15 | -1.206452875 | 0.2   | 0.676 | 2.65E-10 Platelets | HSP90AA1   |
| 8.88E-15 | -1.386270976 | 0.067 | 0.504 | 2.99E-10 Platelets | ACAP1      |
| 9.74E-15 | 1.341875028  | 0.7   | 0.498 | 3.28E-10 Platelets | PARK7      |
| 1.15E-14 | -1.3336977   | 0.056 | 0.508 | 3.88E-10 Platelets | NACA2      |
| 1.24E-14 | -1.441095002 | 0.033 | 0.456 | 4.17E-10 Platelets | NSA2       |
| 1.42E-14 | -1.38760643  | 0.067 | 0.506 | 4.78E-10 Platelets | VAMP2      |
| 1.43E-14 | -2.044924403 | 0.122 | 0.546 | 4.80E-10 Platelets | S100A11    |
| 1.44E-14 | -1.535238339 | 0.033 | 0.456 | 4.84E-10 Platelets | DBI        |
| 1.68E-14 | -1.12712688  | 0.378 | 0.774 | 5.67E-10 Platelets | SARAF      |
| 1.72E-14 | -1.415469115 | 0.067 | 0.504 | 5.78E-10 Platelets | RARRES3    |
| 1.76E-14 | -1.317550068 | 0.078 | 0.513 | 5.94E-10 Platelets | RSL24D1    |
| 2.07E-14 | -1.360780076 | 0.067 | 0.5   | 6.99E-10 Platelets | HMGN2      |
| 2.78E-14 | -1.937123258 | 0.056 | 0.473 | 9.37E-10 Platelets | CD7        |
| 2.84E-14 | 1.812882782  | 0.5   | 0.242 | 9.58E-10 Platelets | MKRN1      |
| 2.94E-14 | -1.307519029 | 0.089 | 0.517 | 9.91E-10 Platelets | SPCS1      |

|          |              |       |       |          |           |           |
|----------|--------------|-------|-------|----------|-----------|-----------|
| 3.64E-14 | 1.438014123  | 0.6   | 0.368 | 1.23E-09 | Platelets | FKBP8     |
| 3.84E-14 | 1.408736952  | 0.578 | 0.326 | 1.29E-09 | Platelets | AP2M1     |
| 4.58E-14 | -1.521304581 | 0.033 | 0.457 | 1.54E-09 | Platelets | LCK       |
| 5.12E-14 | -1.331511175 | 0.056 | 0.485 | 1.72E-09 | Platelets | EIF3M     |
| 5.24E-14 | -1.211276389 | 0.156 | 0.619 | 1.76E-09 | Platelets | YWHAB     |
| 5.49E-14 | -1.255782961 | 0.133 | 0.578 | 1.85E-09 | Platelets | N4BP2L2   |
| 5.67E-14 | 1.268443555  | 0.267 | 0.074 | 1.91E-09 | Platelets | RGCC      |
| 7.70E-14 | -1.944876584 | 0.133 | 0.561 | 2.59E-09 | Platelets | NEAT1     |
| 7.77E-14 | -1.282663036 | 0.067 | 0.489 | 2.62E-09 | Platelets | MZT2B     |
| 8.25E-14 | -1.513067434 | 0.044 | 0.448 | 2.78E-09 | Platelets | LITAF     |
| 8.78E-14 | 1.078858277  | 0.3   | 0.09  | 2.96E-09 | Platelets | SLC44A2   |
| 1.14E-13 | -1.472755056 | 0.022 | 0.434 | 3.85E-09 | Platelets | PRELID1   |
| 1.20E-13 | 1.126329582  | 0.289 | 0.086 | 4.06E-09 | Platelets | LINC01089 |
| 1.50E-13 | -1.596465482 | 0.078 | 0.474 | 5.04E-09 | Platelets | NOSIP     |
| 1.51E-13 | 1.420695707  | 0.289 | 0.086 | 5.09E-09 | Platelets | ARMCX3    |
| 1.57E-13 | 1.134417804  | 0.622 | 0.355 | 5.29E-09 | Platelets | CD63      |
| 1.70E-13 | 1.402546136  | 0.633 | 0.392 | 5.72E-09 | Platelets | MSN       |
| 1.72E-13 | -1.37032922  | 0.089 | 0.508 | 5.79E-09 | Platelets | POLR2L    |
| 1.85E-13 | -1.108901852 | 0.156 | 0.614 | 6.24E-09 | Platelets | COX5B     |
| 2.03E-13 | -1.422659897 | 0.067 | 0.472 | 6.84E-09 | Platelets | IL2RG     |
| 2.04E-13 | -1.353277274 | 0.044 | 0.448 | 6.88E-09 | Platelets | GTF3A     |
| 2.08E-13 | 1.319936279  | 0.378 | 0.143 | 7.01E-09 | Platelets | UBE2E3    |
| 2.41E-13 | -1.358873231 | 0.067 | 0.48  | 8.12E-09 | Platelets | SEC61B    |
| 2.53E-13 | -1.420830362 | 0.011 | 0.403 | 8.53E-09 | Platelets | ANKRD12   |
| 2.92E-13 | -1.295122768 | 0.056 | 0.473 | 9.85E-09 | Platelets | FUS       |
| 3.10E-13 | -1.251862823 | 0.089 | 0.505 | 1.05E-08 | Platelets | C19orf53  |
| 3.11E-13 | -1.255071123 | 0.067 | 0.477 | 1.05E-08 | Platelets | ICAM3     |
| 3.33E-13 | -1.437130332 | 0.022 | 0.409 | 1.12E-08 | Platelets | FAM49B    |
| 3.34E-13 | 1.209914099  | 0.3   | 0.096 | 1.13E-08 | Platelets | UBXN6     |
| 3.35E-13 | -1.382125107 | 0.067 | 0.472 | 1.13E-08 | Platelets | PSME2     |
| 3.52E-13 | -1.348739281 | 0.067 | 0.469 | 1.18E-08 | Platelets | POLR2J3   |
| 3.59E-13 | 1.447276209  | 0.289 | 0.089 | 1.21E-08 | Platelets | PTTG1IP   |
| 4.16E-13 | -1.3351205   | 0.056 | 0.452 | 1.40E-08 | Platelets | NCL       |
| 4.55E-13 | -1.710803873 | 0.089 | 0.484 | 1.53E-08 | Platelets | GSTP1     |
| 4.81E-13 | -1.431926346 | 0.022 | 0.413 | 1.62E-08 | Platelets | GYPC      |
| 5.09E-13 | 1.33139639   | 0.311 | 0.103 | 1.71E-08 | Platelets | USF2      |
| 6.40E-13 | -1.216333105 | 0.133 | 0.547 | 2.16E-08 | Platelets | UXT       |
| 7.19E-13 | -1.361004835 | 0.078 | 0.487 | 2.42E-08 | Platelets | SELL      |
| 9.55E-13 | 1.478652322  | 0.522 | 0.29  | 3.22E-08 | Platelets | SUPT4H1   |
| 9.88E-13 | -1.450996698 | 0.011 | 0.394 | 3.33E-08 | Platelets | ISG20     |
| 1.07E-12 | -1.556424608 | 0.089 | 0.492 | 3.62E-08 | Platelets | CXCR4     |
| 1.25E-12 | -1.188879469 | 0.078 | 0.484 | 4.21E-08 | Platelets | TRMT112   |
| 2.11E-12 | -1.236216774 | 0.056 | 0.441 | 7.10E-08 | Platelets | SNRPG     |
| 2.44E-12 | -1.439461508 | 0.056 | 0.434 | 8.22E-08 | Platelets | LY6E      |
| 2.72E-12 | -1.208161744 | 0.089 | 0.488 | 9.18E-08 | Platelets | PPIB      |
| 2.85E-12 | 1.316200448  | 0.544 | 0.317 | 9.60E-08 | Platelets | TERF2IP   |
| 3.39E-12 | -1.280248669 | 0.3   | 0.709 | 1.14E-07 | Platelets | HCST      |
| 3.60E-12 | -1.106858039 | 0.067 | 0.457 | 1.21E-07 | Platelets | ATP5A1    |
| 3.82E-12 | -1.494064065 | 0.022 | 0.392 | 1.29E-07 | Platelets | ZFP36L2   |
| 3.98E-12 | 1.611819426  | 0.611 | 0.43  | 1.34E-07 | Platelets | TRAPPC1   |
| 4.92E-12 | -1.15975043  | 0.056 | 0.44  | 1.66E-07 | Platelets | PNRC1     |

|          |              |       |       |                    |          |
|----------|--------------|-------|-------|--------------------|----------|
| 5.49E-12 | -1.095398219 | 0.078 | 0.466 | 1.85E-07 Platelets | EIF4B    |
| 5.76E-12 | -1.309829674 | 0.022 | 0.389 | 1.94E-07 Platelets | LEPROTL1 |
| 5.85E-12 | -1.107554734 | 0.056 | 0.444 | 1.97E-07 Platelets | ERH      |
| 6.36E-12 | -1.234352915 | 0.056 | 0.433 | 2.14E-07 Platelets | SF1      |
| 8.10E-12 | -1.069557175 | 0.078 | 0.477 | 2.73E-07 Platelets | ATP5J2   |
| 8.62E-12 | -1.262502555 | 0.033 | 0.396 | 2.91E-07 Platelets | PEBP1    |
| 8.62E-12 | -1.258646218 | 0.067 | 0.447 | 2.91E-07 Platelets | CSTB     |
| 8.81E-12 | -1.13738299  | 0.2   | 0.608 | 2.97E-07 Platelets | EVL      |
| 9.23E-12 | 1.135378895  | 0.278 | 0.089 | 3.11E-07 Platelets | HMG20B   |
| 1.04E-11 | -1.311052506 | 0.022 | 0.381 | 3.51E-07 Platelets | RCSL1    |
| 1.08E-11 | 1.293806566  | 0.467 | 0.244 | 3.66E-07 Platelets | NDUFA5   |
| 1.26E-11 | -1.250677449 | 0.011 | 0.37  | 4.24E-07 Platelets | SNHG8    |
| 1.32E-11 | -1.228488478 | 0.033 | 0.39  | 4.46E-07 Platelets | FBL      |
| 1.37E-11 | 1.154838596  | 0.4   | 0.169 | 4.60E-07 Platelets | CAPN2    |
| 1.40E-11 | -1.341332147 | 0.022 | 0.375 | 4.71E-07 Platelets | ANXA6    |
| 1.81E-11 | -1.231833729 | 0.011 | 0.359 | 6.11E-07 Platelets | HSPE1    |
| 1.99E-11 | -1.748689321 | 0.089 | 0.449 | 6.72E-07 Platelets | IL7R     |
| 2.03E-11 | 1.092214806  | 0.344 | 0.132 | 6.83E-07 Platelets | UBE2J1   |
| 2.08E-11 | -1.180594334 | 0.056 | 0.417 | 7.02E-07 Platelets | MINOS1   |
| 2.25E-11 | 1.093312861  | 0.6   | 0.338 | 7.57E-07 Platelets | AP1S2    |
| 2.27E-11 | -1.103855778 | 0.122 | 0.522 | 7.66E-07 Platelets | ATP5O    |
| 2.86E-11 | -1.180783493 | 0.089 | 0.456 | 9.63E-07 Platelets | UQCRCQ   |
| 2.88E-11 | -2.036133875 | 0.056 | 0.403 | 9.71E-07 Platelets | TRBC1    |
| 2.90E-11 | -1.491897965 | 0.033 | 0.384 | 9.76E-07 Platelets | MYO1F    |
| 3.26E-11 | 1.30473029   | 0.433 | 0.209 | 1.10E-06 Platelets | STRAP    |
| 3.38E-11 | 1.284994406  | 0.433 | 0.214 | 1.14E-06 Platelets | ANAPC5   |
| 3.79E-11 | -1.347103664 | 0.044 | 0.4   | 1.28E-06 Platelets | JUNB     |
| 3.86E-11 | -1.401114943 | 0.033 | 0.386 | 1.30E-06 Platelets | CD3G     |
| 4.20E-11 | -1.035174116 | 0.056 | 0.432 | 1.42E-06 Platelets | C11orf31 |
| 5.08E-11 | 1.346296564  | 0.567 | 0.354 | 1.71E-06 Platelets | AP2S1    |
| 5.37E-11 | 1.319324692  | 0.3   | 0.107 | 1.81E-06 Platelets | SLC2A3   |
| 5.60E-11 | -1.391625693 | 0.044 | 0.386 | 1.89E-06 Platelets | C1orf162 |
| 5.79E-11 | 1.435334577  | 0.456 | 0.238 | 1.95E-06 Platelets | CMTM6    |
| 5.91E-11 | -1.236302639 | 0.022 | 0.36  | 1.99E-06 Platelets | RWDD1    |
| 5.94E-11 | -1.276691186 | 0.011 | 0.346 | 2.00E-06 Platelets | RNF213   |
| 7.33E-11 | 1.249204928  | 0.411 | 0.192 | 2.47E-06 Platelets | GTF3C6   |
| 7.81E-11 | -1.131004903 | 0.044 | 0.395 | 2.63E-06 Platelets | LSM7     |
| 8.11E-11 | -1.264214716 | 0.056 | 0.415 | 2.73E-06 Platelets | CD2      |
| 8.82E-11 | 1.096520721  | 0.311 | 0.117 | 2.97E-06 Platelets | UXS1     |
| 8.88E-11 | -1.115961013 | 0.067 | 0.42  | 2.99E-06 Platelets | SNRPE    |
| 9.20E-11 | -1.093278408 | 0.022 | 0.371 | 3.10E-06 Platelets | SNRPB2   |
| 9.71E-11 | -1.997362851 | 0.078 | 0.428 | 3.27E-06 Platelets | CTSS     |
| 1.07E-10 | -1.323490092 | 0.044 | 0.385 | 3.60E-06 Platelets | CRIP1    |
| 1.10E-10 | -1.157389693 | 0.033 | 0.374 | 3.72E-06 Platelets | CYTIP    |
| 1.13E-10 | 1.582100441  | 0.5   | 0.294 | 3.80E-06 Platelets | C7orf73  |
| 1.13E-10 | -1.14318953  | 0.044 | 0.388 | 3.80E-06 Platelets | RSL1D1   |
| 1.15E-10 | -1.123779832 | 0.033 | 0.374 | 3.88E-06 Platelets | SNRPF    |
| 1.19E-10 | -1.224979107 | 0.067 | 0.415 | 4.01E-06 Platelets | LCP1     |
| 1.21E-10 | -1.013494316 | 0.089 | 0.464 | 4.07E-06 Platelets | ATP5G3   |
| 1.45E-10 | -1.102396211 | 0.044 | 0.392 | 4.87E-06 Platelets | KMT2E    |
| 1.66E-10 | -1.168712449 | 0.033 | 0.367 | 5.61E-06 Platelets | COX5A    |

|          |              |       |       |                       |               |
|----------|--------------|-------|-------|-----------------------|---------------|
| 1.89E-10 | -2.132646659 | 0.078 | 0.418 | 6.35E-06 Platelets    | LGALS1        |
| 1.97E-10 | -1.130876983 | 0.044 | 0.387 | 6.62E-06 Platelets    | PA2G4         |
| 2.27E-10 | -1.1371089   | 0.022 | 0.352 | 7.64E-06 Platelets    | LINC00493     |
| 2.49E-10 | -1.063753434 | 0.044 | 0.388 | 8.38E-06 Platelets    | ATP5H         |
| 2.95E-10 | -1.226145448 | 0.033 | 0.357 | 9.95E-06 Platelets    | IFI16         |
| 3.04E-10 | -1.138186013 | 0.022 | 0.351 | 1.02E-05 Platelets    | HSD17B11      |
| 3.22E-10 | -1.235275501 | 0.033 | 0.365 | 1.08E-05 Platelets    | IRF1          |
| 3.61E-10 | -1.491683015 | 0.022 | 0.343 | 1.21E-05 Platelets    | CCR7          |
| 4.82E-10 | -1.36065067  | 0.011 | 0.33  | 1.63E-05 Platelets    | MT2A          |
| 5.19E-10 | -2.22357114  | 0.033 | 0.357 | 1.75E-05 Platelets    | HLA-DRB1      |
| 5.25E-10 | -1.049302012 | 0.067 | 0.404 | 1.77E-05 Platelets    | C14orf166     |
| 5.42E-10 | -1.021289459 | 0.144 | 0.497 | 1.83E-05 Platelets    | SRSF3         |
| 5.58E-10 | -1.089422981 | 0.044 | 0.373 | 1.88E-05 Platelets    | EIF2S3        |
| 5.62E-10 | -1.099062297 | 0.067 | 0.398 | 1.89E-05 Platelets    | LUC7L3        |
| 6.88E-10 | -1.055436212 | 0.056 | 0.383 | 2.32E-05 Platelets    | SF3B5         |
| 8.80E-10 | -1.0880813   | 0.044 | 0.372 | 2.96E-05 Platelets    | PSMA4         |
| 9.59E-10 | -1.099313677 | 0.044 | 0.37  | 3.23E-05 Platelets    | GLRX          |
| 9.63E-10 | -1.096581638 | 0.022 | 0.335 | 3.24E-05 Platelets    | FNBP1         |
| 1.02E-09 | -2.916186738 | 0.044 | 0.357 | 3.45E-05 Platelets    | HLA-DRA       |
| 1.03E-09 | 1.421882664  | 0.389 | 0.187 | 3.48E-05 Platelets    | PRKARIA       |
| 1.07E-09 | -1.475391403 | 0.033 | 0.338 | 3.61E-05 Platelets    | IFITM1        |
| 1.08E-09 | -1.037084647 | 0.067 | 0.392 | 3.63E-05 Platelets    | TOMM20        |
| 1.13E-09 | -1.139334483 | 0.022 | 0.336 | 3.80E-05 Platelets    | RP5-1171I10.5 |
| 1.13E-09 | -1.036166727 | 0.033 | 0.352 | 3.81E-05 Platelets    | NDUFA12       |
| 1.18E-09 | -1.042262502 | 0.033 | 0.351 | 3.97E-05 Platelets    | PPP1R2        |
| 1.18E-09 | -1.039572458 | 0.044 | 0.369 | 3.99E-05 Platelets    | DDX24         |
| 1.21E-09 | -1.12592009  | 0.033 | 0.347 | 4.08E-05 Platelets    | TBC1D10C      |
| 1.44E-09 | -1.055959298 | 0.022 | 0.332 | 4.86E-05 Platelets    | PPA1          |
| 1.57E-09 | -1.074736931 | 0.033 | 0.344 | 5.27E-05 Platelets    | DDX18         |
| 1.69E-09 | -1.055659993 | 0.044 | 0.363 | 5.70E-05 Platelets    | ATM           |
| 1.70E-09 | -1.193302778 | 0.056 | 0.378 | 5.74E-05 Platelets    | ANXA2         |
| 1.76E-09 | 1.406288976  | 0.344 | 0.155 | 5.92E-05 Platelets    | ADI1          |
| 1.77E-09 | -1.060064822 | 0.056 | 0.372 | 5.96E-05 Platelets    | UFC1          |
| 1.80E-09 | -1.028609753 | 0.1   | 0.419 | 6.07E-05 Platelets    | LDHA          |
| 1.81E-09 | 1.260861285  | 0.367 | 0.171 | 6.10E-05 Platelets    | EIF4E         |
| 1.82E-09 | -1.054440519 | 0.067 | 0.39  | 6.14E-05 Platelets    | SRRM1         |
| 1.85E-09 | -1.20331585  | 0.011 | 0.307 | 6.25E-05 Platelets    | TCF7          |
| 1.89E-09 | -1.349926937 | 0     | 0.295 | 6.36E-05 Platelets    | BIRC3         |
| 1.92E-09 | -1.037289683 | 0.067 | 0.392 | 6.47E-05 Platelets    | ACTR2         |
| 2.06E-09 | -1.009281884 | 0.1   | 0.431 | 6.96E-05 Platelets    | HNRNPA0       |
| 2.19E-09 | -1.079588299 | 0.033 | 0.336 | 7.38E-05 Platelets    | PRDX2         |
| 2.29E-09 | -2.463964054 | 0.056 | 0.363 | 7.70E-05 Platelets    | TYROBP        |
| 2.73E-09 | -1.014708631 | 0.022 | 0.325 | 9.21E-05 Platelets    | TUFM          |
| 2.86E-09 | -1.154490964 | 0.033 | 0.332 | 9.62E-05 Platelets    | CLEC2B        |
| 2.94E-09 | -1.172566863 | 0.022 | 0.317 | 9.92E-05 Platelets    | NFKBIA        |
| 3.01E-09 | -1.075504295 | 0.011 | 0.306 | 0.000101546 Platelets | ARHGAP30      |
| 3.08E-09 | -1.062973808 | 0.044 | 0.354 | 0.000103662 Platelets | GIMAP1        |
| 3.09E-09 | 1.371150273  | 0.4   | 0.195 | 0.000104115 Platelets | C12orf75      |
| 3.30E-09 | -1.089237237 | 0.067 | 0.37  | 0.000111025 Platelets | S1PR4         |
| 3.33E-09 | -1.089437496 | 0.033 | 0.323 | 0.000112335 Platelets | PNN           |
| 3.42E-09 | -1.144174628 | 0.022 | 0.318 | 0.000115314 Platelets | PIK3IP1       |

|          |              |       |       |             |           |            |
|----------|--------------|-------|-------|-------------|-----------|------------|
| 3.54E-09 | -1.057579938 | 0.044 | 0.353 | 0.000119291 | Platelets | TSTD1      |
| 4.98E-09 | -1.03040486  | 0.056 | 0.364 | 0.000167676 | Platelets | ARGLU1     |
| 5.08E-09 | 1.129741537  | 0.3   | 0.125 | 0.000171295 | Platelets | BEX4       |
| 5.16E-09 | -1.017326677 | 0.056 | 0.36  | 0.000173928 | Platelets | SEPT9      |
| 5.21E-09 | -1.09476717  | 0.011 | 0.299 | 0.000175423 | Platelets | RHOH       |
| 5.78E-09 | 1.16506732   | 0.267 | 0.101 | 0.000194736 | Platelets | PGD        |
| 5.82E-09 | -1.441837001 | 0.056 | 0.357 | 0.000196256 | Platelets | ID2        |
| 6.29E-09 | -1.797018409 | 0.067 | 0.365 | 0.000211875 | Platelets | HLA-DPA1   |
| 6.63E-09 | -1.01360583  | 0.089 | 0.411 | 0.000223461 | Platelets | PCSK7      |
| 6.69E-09 | -1.083150079 | 0.056 | 0.348 | 0.000225472 | Platelets | PLP2       |
| 6.78E-09 | -1.085081497 | 0.033 | 0.319 | 0.000228552 | Platelets | BIN1       |
| 7.27E-09 | 1.219234898  | 0.311 | 0.133 | 0.000244853 | Platelets | DIAPH1     |
| 7.40E-09 | 1.175954608  | 0.367 | 0.174 | 0.000249256 | Platelets | LSM1       |
| 7.65E-09 | 1.293191096  | 0.811 | 0.862 | 0.000257604 | Platelets | H3F3B      |
| 7.65E-09 | -1.02658877  | 0.011 | 0.295 | 0.000257723 | Platelets | ANKRD44    |
| 7.73E-09 | -1.041326154 | 0.044 | 0.34  | 0.000260474 | Platelets | HMGN3      |
| 8.17E-09 | 1.12926702   | 0.4   | 0.213 | 0.000275273 | Platelets | ANXA7      |
| 8.50E-09 | -1.287240572 | 0.044 | 0.332 | 0.000286407 | Platelets | ALOX5AP    |
| 9.08E-09 | -1.830558573 | 0     | 0.275 | 0.000306089 | Platelets | RPS4Y1     |
| 9.38E-09 | -1.07138354  | 0.067 | 0.364 | 0.000315938 | Platelets | TNRC6B     |
| 9.61E-09 | 1.178739735  | 0.378 | 0.185 | 0.000323964 | Platelets | COMMD7     |
| 1.01E-08 | 1.34461225   | 0.322 | 0.141 | 0.000341735 | Platelets | IQGAP2     |
| 1.17E-08 | -1.034153567 | 0.033 | 0.314 | 0.000394321 | Platelets | CCDC12     |
| 1.22E-08 | -1.051417234 | 0.022 | 0.3   | 0.000409471 | Platelets | ATXN8OS    |
| 1.25E-08 | -1.014811524 | 0.011 | 0.29  | 0.000420957 | Platelets | AAK1       |
| 1.28E-08 | -1.090651889 | 0     | 0.271 | 0.00043107  | Platelets | FCMR       |
| 1.29E-08 | -1.08930355  | 0.033 | 0.324 | 0.000435778 | Platelets | IER2       |
| 1.35E-08 | 1.142046873  | 0.544 | 0.373 | 0.000454018 | Platelets | PRDX5      |
| 1.45E-08 | -1.265816567 | 0.044 | 0.33  | 0.000487737 | Platelets | CD247      |
| 1.54E-08 | -1.029817884 | 0.044 | 0.329 | 0.00051857  | Platelets | TAPBP      |
| 1.58E-08 | -1.119081106 | 0.011 | 0.285 | 0.000530747 | Platelets | LINCO0861  |
| 2.19E-08 | -1.041932975 | 0.044 | 0.327 | 0.000738481 | Platelets | HSP90B1    |
| 2.43E-08 | -1.024339715 | 0.044 | 0.327 | 0.000818644 | Platelets | PGLS       |
| 2.74E-08 | 1.081817143  | 0.667 | 0.637 | 0.0009221   | Platelets | NDUFA4     |
| 2.81E-08 | 1.061077006  | 0.622 | 0.506 | 0.000945439 | Platelets | CAP1       |
| 3.01E-08 | 1.01680359   | 0.278 | 0.114 | 0.001013063 | Platelets | HIGD1A     |
| 3.03E-08 | 1.121569794  | 0.533 | 0.368 | 0.001021181 | Platelets | VPS28      |
| 3.72E-08 | -1.003597566 | 0.044 | 0.317 | 0.001253    | Platelets | BST2       |
| 3.75E-08 | -1.089957559 | 0.022 | 0.286 | 0.001264    | Platelets | GLIPR1     |
| 3.80E-08 | -1.079567516 | 0.033 | 0.299 | 0.001278972 | Platelets | GABPB1-AS1 |
| 4.18E-08 | -1.300673568 | 0.033 | 0.298 | 0.001409148 | Platelets | GZMM       |
| 4.93E-08 | 1.101305301  | 0.267 | 0.109 | 0.001661232 | Platelets | ORAI1      |
| 5.60E-08 | -1.065821635 | 0.044 | 0.317 | 0.00188823  | Platelets | XBP1       |
| 9.30E-08 | 1.108902808  | 0.378 | 0.197 | 0.003133559 | Platelets | HSBP1      |
| 1.12E-07 | 1.059160139  | 0.567 | 0.42  | 0.003777642 | Platelets | ARPC4      |
| 1.13E-07 | -2.527495978 | 0.022 | 0.27  | 0.00382107  | Platelets | KLRB1      |
| 1.18E-07 | -1.081332502 | 0.056 | 0.322 | 0.003961382 | Platelets | PYCARD     |
| 1.45E-07 | 1.203217982  | 0.467 | 0.302 | 0.004880887 | Platelets | YWHAQ      |
| 1.58E-07 | 1.277206491  | 0.456 | 0.293 | 0.005317377 | Platelets | PCNP       |
| 1.64E-07 | -2.767698588 | 0.067 | 0.322 | 0.005538769 | Platelets | NKG7       |
| 1.84E-07 | -1.745157071 | 0.056 | 0.314 | 0.006210892 | Platelets | AIF1       |

|          |              |       |       |             |           |         |
|----------|--------------|-------|-------|-------------|-----------|---------|
| 2.28E-07 | 1.181370255  | 0.467 | 0.302 | 0.007686574 | Platelets | WIPF1   |
| 3.13E-07 | 1.006945837  | 0.3   | 0.137 | 0.010553129 | Platelets | EHD1    |
| 4.07E-07 | 1.237306906  | 0.289 | 0.136 | 0.013725677 | Platelets | UBE2F   |
| 4.10E-07 | 1.502622418  | 0.478 | 0.339 | 0.013821332 | Platelets | ELF1    |
| 6.52E-07 | 1.104430812  | 0.478 | 0.345 | 0.021959324 | Platelets | PAIP2   |
| 6.74E-07 | -4.312919852 | 0.5   | 0.322 | 0.022714562 | Platelets | HBB     |
| 8.40E-07 | 1.097612113  | 0.333 | 0.174 | 0.028300353 | Platelets | DNAJC15 |
| 9.26E-07 | -1.01945403  | 0.033 | 0.27  | 0.03119508  | Platelets | NCF1    |
| 1.08E-06 | 1.110312801  | 0.4   | 0.24  | 0.036432503 | Platelets | ACP1    |
| 1.14E-06 | 1.25723202   | 0.256 | 0.114 | 0.038453951 | Platelets | PHF20L1 |

# net\_lr

| source    | target   | ligand   | receptor   | prob     | pval | interaction_name   | interaction_name_2   | pathway_name | annotation         | evidence                       |
|-----------|----------|----------|------------|----------|------|--------------------|----------------------|--------------|--------------------|--------------------------------|
| T_cells   | Monocyte | CCL5     | CCR1       | 3.00E-06 | 0    | CCL5_CCR1          | CCL5 - CCR1          | CCL          | Secreted Signaling | KEGG: hsa04060                 |
| NK_cell   | Monocyte | CCL5     | CCR1       | 1.80E-05 | 0    | CCL5_CCR1          | CCL5 - CCR1          | CCL          | Secreted Signaling | KEGG: hsa04060                 |
| Platelets | Monocyte | CCL5     | CCR1       | 3.68E-05 | 0    | CCL5_CCR1          | CCL5 - CCR1          | CCL          | Secreted Signaling | KEGG: hsa04060                 |
| T_cells   | B_cell   | MIF      | CD74_CXCR4 | 7.06E-05 | 0    | MIF_CD74_CXCR4     | MIF - (CD74+CXCR4)   | MIF          | Secreted Signaling | PMID: 29637711; PMID: 24760155 |
| NK_cell   | B_cell   | MIF      | CD74_CXCR4 | 2.35E-05 | 0    | MIF_CD74_CXCR4     | MIF - (CD74+CXCR4)   | MIF          | Secreted Signaling | PMID: 29637711; PMID: 24760155 |
| Monocyte  | B_cell   | MIF      | CD74_CXCR4 | 2.35E-05 | 0    | MIF_CD74_CXCR4     | MIF - (CD74+CXCR4)   | MIF          | Secreted Signaling | PMID: 29637711; PMID: 24760155 |
| B_cell    | B_cell   | MIF      | CD74_CXCR4 | 2.35E-05 | 0    | MIF_CD74_CXCR4     | MIF - (CD74+CXCR4)   | MIF          | Secreted Signaling | PMID: 29637711; PMID: 24760155 |
| T_cells   | Monocyte | MIF      | CD74_CD44  | 2.89E-05 | 0    | MIF_CD74_CD44      | MIF - (CD74+CD44)    | MIF          | Secreted Signaling | PMID: 29637711; PMID: 26175090 |
| NK_cell   | Monocyte | MIF      | CD74_CD44  | 9.65E-06 | 0    | MIF_CD74_CD44      | MIF - (CD74+CD44)    | MIF          | Secreted Signaling | PMID: 29637711; PMID: 26175090 |
| Monocyte  | Monocyte | MIF      | CD74_CD44  | 9.65E-06 | 0    | MIF_CD74_CD44      | MIF - (CD74+CD44)    | MIF          | Secreted Signaling | PMID: 29637711; PMID: 26175090 |
| B_cell    | Monocyte | MIF      | CD74_CD44  | 9.65E-06 | 0    | MIF_CD74_CD44      | MIF - (CD74+CD44)    | MIF          | Secreted Signaling | PMID: 29637711; PMID: 26175090 |
| T_cells   | B_cell   | MIF      | CD74_CD44  | 2.35E-05 | 0    | MIF_CD74_CD44      | MIF - (CD74+CD44)    | MIF          | Secreted Signaling | PMID: 29637711; PMID: 26175090 |
| T_cells   | Monocyte | IL16     | CD4        | 7.51E-07 | 0    | IL16_CD4           | IL16 - CD4           | IL16         | Secreted Signaling | KEGG: hsa04060                 |
| Monocyte  | B_cell   | TNFSF13B | TNFRSF13C  | 3.00E-06 | 0    | TNFSF13B_TNFRSF13C | TNFSF13B - TNFRSF13C | BAFF         | Secreted Signaling | KEGG: hsa04060                 |
| Monocyte  | T_cells  | LGALS9   | PTPRC      | 4.51E-06 | 0    | LGALS9_CD45        | LGALS9 - CD45        | GALECTIN     | Secreted Signaling | PMID: 30120235                 |
| Monocyte  | NK_cell  | LGALS9   | PTPRC      | 3.75E-06 | 0    | LGALS9_CD45        | LGALS9 - CD45        | GALECTIN     | Secreted Signaling | PMID: 30120235                 |
| Monocyte  | Monocyte | LGALS9   | PTPRC      | 3.00E-06 | 0    | LGALS9_CD45        | LGALS9 - CD45        | GALECTIN     | Secreted Signaling | PMID: 30120235                 |
| Monocyte  | B_cell   | LGALS9   | PTPRC      | 2.25E-06 | 0    | LGALS9_CD45        | LGALS9 - CD45        | GALECTIN     | Secreted Signaling | PMID: 30120235                 |
| Monocyte  | T_cells  | LGALS9   | CD44       | 2.25E-06 | 0    | LGALS9_CD44        | LGALS9 - CD44        | GALECTIN     | Secreted Signaling | PMID: 25065622                 |
| Monocyte  | Monocyte | LGALS9   | CD44       | 3.75E-06 | 0    | LGALS9_CD44        | LGALS9 - CD44        | GALECTIN     | Secreted Signaling | PMID: 25065622                 |
| Monocyte  | B_cell   | LGALS9   | CD44       | 7.51E-07 | 0    | LGALS9_CD44        | LGALS9 - CD44        | GALECTIN     | Secreted Signaling | PMID: 25065622                 |

# Table S1

| seed | sensitivity | specificity | Youden_index | cohort               |
|------|-------------|-------------|--------------|----------------------|
| 6    |             | 1           | 0            | 0 training           |
| 6    |             | 1           | 0.022222222  | 0.022222222 training |
| 6    |             | 1           | 0.044444444  | 0.044444444 training |
| 6    |             | 1           | 0.066666667  | 0.066666667 training |
| 6    |             | 1           | 0.088888889  | 0.088888889 training |
| 6    | 0.98989899  | 0.088888889 | 0.078787879  | 0.078787879 training |
| 6    | 0.98989899  | 0.111111111 | 0.101010101  | 0.101010101 training |
| 6    | 0.97979798  | 0.111111111 | 0.090909091  | 0.090909091 training |
| 6    | 0.96969697  | 0.111111111 | 0.080808081  | 0.080808081 training |
| 6    | 0.96969697  | 0.133333333 | 0.103030303  | 0.103030303 training |
| 6    | 0.96969697  | 0.155555556 | 0.125252525  | 0.125252525 training |
| 6    | 0.95959596  | 0.155555556 | 0.115151515  | 0.115151515 training |
| 6    | 0.95959596  | 0.177777778 | 0.137373737  | 0.137373737 training |
| 6    | 0.94949494  | 0.177777778 | 0.127272727  | 0.127272727 training |
| 6    | 0.94949494  | 0.2         | 0.149494949  | 0.149494949 training |
| 6    | 0.94949494  | 0.222222222 | 0.171717172  | 0.171717172 training |
| 6    | 0.94949494  | 0.244444444 | 0.193939394  | 0.193939394 training |
| 6    | 0.93939393  | 0.244444444 | 0.183838384  | 0.183838384 training |
| 6    | 0.92929292  | 0.244444444 | 0.173737374  | 0.173737374 training |
| 6    | 0.92929292  | 0.266666667 | 0.195959596  | 0.195959596 training |
| 6    | 0.91919191  | 0.266666667 | 0.185858586  | 0.185858586 training |
| 6    | 0.91919191  | 0.288888889 | 0.208080808  | 0.208080808 training |
| 6    | 0.90909090  | 0.288888889 | 0.197979798  | 0.197979798 training |
| 6    | 0.90909090  | 0.311111111 | 0.22020202   | 0.22020202 training  |
| 6    | 0.90909090  | 0.333333333 | 0.242424242  | 0.242424242 training |
| 6    | 0.90909090  | 0.355555556 | 0.264646465  | 0.264646465 training |
| 6    | 0.90909090  | 0.377777778 | 0.286868687  | 0.286868687 training |
| 6    | 0.89898989  | 0.377777778 | 0.276767677  | 0.276767677 training |
| 6    | 0.88888888  | 0.377777778 | 0.266666667  | 0.266666667 training |
| 6    | 0.88888888  | 0.4         | 0.288888889  | 0.288888889 training |
| 6    | 0.87878787  | 0.4         | 0.278787879  | 0.278787879 training |
| 6    | 0.86868686  | 0.4         | 0.268686869  | 0.268686869 training |
| 6    | 0.86868686  | 0.422222222 | 0.290909091  | 0.290909091 training |
| 6    | 0.85858585  | 0.422222222 | 0.280808081  | 0.280808081 training |
| 6    | 0.84848484  | 0.422222222 | 0.270707071  | 0.270707071 training |
| 6    | 0.84848484  | 0.444444444 | 0.292929293  | 0.292929293 training |
| 6    | 0.83838383  | 0.444444444 | 0.282828283  | 0.282828283 training |
| 6    | 0.82828282  | 0.444444444 | 0.272727273  | 0.272727273 training |
| 6    | 0.82828282  | 0.466666667 | 0.294949495  | 0.294949495 training |
| 6    | 0.81818181  | 0.466666667 | 0.284848485  | 0.284848485 training |
| 6    | 0.80808080  | 0.466666667 | 0.274747475  | 0.274747475 training |
| 6    | 0.80808080  | 0.488888889 | 0.296969697  | 0.296969697 training |
| 6    | 0.80808080  | 0.511111111 | 0.319191919  | 0.319191919 training |
| 6    | 0.79797979  | 0.511111111 | 0.309090909  | 0.309090909 training |
| 6    | 0.79797979  | 0.533333333 | 0.331313131  | 0.331313131 training |
| 6    | 0.79797979  | 0.555555556 | 0.353535354  | 0.353535354 training |
| 6    | 0.78787878  | 0.555555556 | 0.343434343  | 0.343434343 training |
| 6    | 0.77777777  | 0.555555556 | 0.333333333  | 0.333333333 training |
| 6    | 0.77777777  | 0.577777778 | 0.355555556  | 0.355555556 training |
| 6    | 0.76767676  | 0.577777778 | 0.345454545  | 0.345454545 training |



|   |             |             |             |          |
|---|-------------|-------------|-------------|----------|
| 6 | 0.757575758 | 0.577777778 | 0.335353535 | training |
| 6 | 0.747474747 | 0.577777778 | 0.325252525 | training |
| 6 | 0.737373737 | 0.577777778 | 0.315151515 | training |
| 6 | 0.727272727 | 0.577777778 | 0.305050505 | training |
| 6 | 0.727272727 | 0.6         | 0.327272727 | training |
| 6 | 0.727272727 | 0.622222222 | 0.349494949 | training |
| 6 | 0.717171717 | 0.622222222 | 0.339393939 | training |
| 6 | 0.717171717 | 0.644444444 | 0.361616162 | training |
| 6 | 0.717171717 | 0.666666667 | 0.383838384 | training |
| 6 | 0.717171717 | 0.688888889 | 0.406060606 | training |
| 6 | 0.717171717 | 0.711111111 | 0.428282828 | training |
| 6 | 0.707070707 | 0.711111111 | 0.418181818 | training |
| 6 | 0.707070707 | 0.733333333 | 0.44040404  | training |
| 6 | 0.696969697 | 0.733333333 | 0.43030303  | training |
| 6 | 0.686868687 | 0.733333333 | 0.42020202  | training |
| 6 | 0.676767677 | 0.733333333 | 0.41010101  | training |
| 6 | 0.676767677 | 0.755555556 | 0.432323232 | training |
| 6 | 0.666666667 | 0.755555556 | 0.422222222 | training |
| 6 | 0.656565657 | 0.755555556 | 0.412121212 | training |
| 6 | 0.646464646 | 0.755555556 | 0.402020202 | training |
| 6 | 0.636363636 | 0.755555556 | 0.391919192 | training |
| 6 | 0.626262626 | 0.755555556 | 0.381818182 | training |
| 6 | 0.616161616 | 0.755555556 | 0.371717172 | training |
| 6 | 0.606060606 | 0.755555556 | 0.361616162 | training |
| 6 | 0.595959596 | 0.755555556 | 0.351515152 | training |
| 6 | 0.595959596 | 0.777777778 | 0.373737374 | training |
| 6 | 0.585858586 | 0.777777778 | 0.363636364 | training |
| 6 | 0.575757576 | 0.777777778 | 0.353535354 | training |
| 6 | 0.565656566 | 0.777777778 | 0.343434343 | training |
| 6 | 0.565656566 | 0.8         | 0.365656566 | training |
| 6 | 0.555555556 | 0.8         | 0.355555556 | training |
| 6 | 0.545454545 | 0.8         | 0.345454545 | training |
| 6 | 0.545454545 | 0.822222222 | 0.367676768 | training |
| 6 | 0.545454545 | 0.844444444 | 0.38989899  | training |
| 6 | 0.545454545 | 0.866666667 | 0.412121212 | training |
| 6 | 0.535353535 | 0.866666667 | 0.402020202 | training |
| 6 | 0.525252525 | 0.866666667 | 0.391919192 | training |
| 6 | 0.525252525 | 0.888888889 | 0.414141414 | training |
| 6 | 0.515151515 | 0.888888889 | 0.404040404 | training |
| 6 | 0.505050505 | 0.888888889 | 0.393939394 | training |
| 6 | 0.494949495 | 0.888888889 | 0.383838384 | training |
| 6 | 0.484848485 | 0.888888889 | 0.373737374 | training |
| 6 | 0.474747475 | 0.888888889 | 0.363636364 | training |
| 6 | 0.464646465 | 0.888888889 | 0.353535354 | training |
| 6 | 0.454545455 | 0.888888889 | 0.343434343 | training |
| 6 | 0.444444444 | 0.888888889 | 0.333333333 | training |
| 6 | 0.434343434 | 0.888888889 | 0.323232323 | training |
| 6 | 0.424242424 | 0.888888889 | 0.313131313 | training |
| 6 | 0.414141414 | 0.888888889 | 0.303030303 | training |
| 6 | 0.404040404 | 0.888888889 | 0.292929293 | training |
| 6 | 0.404040404 | 0.911111111 | 0.315151515 | training |

|   |             |             |             |            |
|---|-------------|-------------|-------------|------------|
| 6 | 0.393939394 | 0.911111111 | 0.305050505 | training   |
| 6 | 0.393939394 | 0.933333333 | 0.327272727 | training   |
| 6 | 0.383838384 | 0.933333333 | 0.317171717 | training   |
| 6 | 0.373737374 | 0.933333333 | 0.307070707 | training   |
| 6 | 0.363636364 | 0.933333333 | 0.296969697 | training   |
| 6 | 0.353535354 | 0.933333333 | 0.286868687 | training   |
| 6 | 0.343434343 | 0.933333333 | 0.276767677 | training   |
| 6 | 0.333333333 | 0.933333333 | 0.266666667 | training   |
| 6 | 0.323232323 | 0.933333333 | 0.256565657 | training   |
| 6 | 0.313131313 | 0.933333333 | 0.246464646 | training   |
| 6 | 0.303030303 | 0.933333333 | 0.236363636 | training   |
| 6 | 0.292929293 | 0.933333333 | 0.226262626 | training   |
| 6 | 0.292929293 | 0.955555556 | 0.248484848 | training   |
| 6 | 0.282828283 | 0.955555556 | 0.238383838 | training   |
| 6 | 0.272727273 | 0.955555556 | 0.228282828 | training   |
| 6 | 0.262626263 | 0.955555556 | 0.218181818 | training   |
| 6 | 0.252525253 | 0.955555556 | 0.208080808 | training   |
| 6 | 0.242424242 | 0.955555556 | 0.197979798 | training   |
| 6 | 0.232323232 | 0.955555556 | 0.187878788 | training   |
| 6 | 0.222222222 | 0.955555556 | 0.177777778 | training   |
| 6 | 0.212121212 | 0.955555556 | 0.167676768 | training   |
| 6 | 0.202020202 | 0.955555556 | 0.157575758 | training   |
| 6 | 0.191919192 | 0.955555556 | 0.147474747 | training   |
| 6 | 0.191919192 | 0.977777778 | 0.169696969 | training   |
| 6 | 0.181818182 | 0.977777778 | 0.159595959 | training   |
| 6 | 0.171717172 | 0.977777778 | 0.149494949 | training   |
| 6 | 0.161616162 | 0.977777778 | 0.139393939 | training   |
| 6 | 0.151515152 | 0.977777778 | 0.129292929 | training   |
| 6 | 0.141414141 | 0.977777778 | 0.119191919 | training   |
| 6 | 0.131313131 | 0.977777778 | 0.109090909 | training   |
| 6 | 0.121212121 | 0.977777778 | 0.098989899 | training   |
| 6 | 0.111111111 | 0.977777778 | 0.088888889 | training   |
| 6 | 0.101010101 | 0.977777778 | 0.078787879 | training   |
| 6 | 0.101010101 | 1           | 0.101010101 | training   |
| 6 | 0.090909091 | 1           | 0.090909091 | training   |
| 6 | 0.080808081 | 1           | 0.080808081 | training   |
| 6 | 0.070707071 | 1           | 0.070707071 | training   |
| 6 | 0.060606061 | 1           | 0.060606061 | training   |
| 6 | 0.050505051 | 1           | 0.050505051 | training   |
| 6 | 0.04040404  | 1           | 0.04040404  | training   |
| 6 | 0.03030303  | 1           | 0.03030303  | training   |
| 6 | 0.02020202  | 1           | 0.02020202  | training   |
| 6 | 0.01010101  | 1           | 0.01010101  | training   |
| 6 | 0           | 1           | 0           | training   |
| 6 | 1           | 0           | 0           | validation |
| 6 | 1           | 0.066666667 | 0.066666667 | validation |
| 6 | 1           | 0.133333333 | 0.133333333 | validation |
| 6 | 1           | 0.2         | 0.2         | validation |
| 6 | 1           | 0.266666667 | 0.266666667 | validation |
| 6 | 1           | 0.333333333 | 0.333333333 | validation |
| 6 | 1           | 0.4         | 0.4         | validation |

|   |             |             |                         |
|---|-------------|-------------|-------------------------|
| 6 | 0.928571429 | 0.4         | 0.328571429 validation  |
| 6 | 0.857142857 | 0.4         | 0.257142857 validation  |
| 6 | 0.785714286 | 0.4         | 0.185714286 validation  |
| 6 | 0.785714286 | 0.466666667 | 0.252380952 validation  |
| 6 | 0.785714286 | 0.533333333 | 0.319047619 validation  |
| 6 | 0.714285714 | 0.533333333 | 0.247619048 validation  |
| 6 | 0.714285714 | 0.6         | 0.314285714 validation  |
| 6 | 0.714285714 | 0.666666667 | 0.380952381 validation  |
| 6 | 0.642857143 | 0.666666667 | 0.30952381 validation   |
| 6 | 0.571428571 | 0.666666667 | 0.238095238 validation  |
| 6 | 0.571428571 | 0.733333333 | 0.304761905 validation  |
| 6 | 0.5         | 0.733333333 | 0.233333333 validation  |
| 6 | 0.5         | 0.8         | 0.3 validation          |
| 6 | 0.428571429 | 0.8         | 0.228571429 validation  |
| 6 | 0.357142857 | 0.8         | 0.157142857 validation  |
| 6 | 0.357142857 | 0.866666667 | 0.223809524 validation  |
| 6 | 0.357142857 | 0.933333333 | 0.29047619 validation   |
| 6 | 0.285714286 | 0.933333333 | 0.219047619 validation  |
| 6 | 0.214285714 | 0.933333333 | 0.147619048 validation  |
| 6 | 0.142857143 | 0.933333333 | 0.076190476 validation  |
| 6 | 0.071428571 | 0.933333333 | 0.004761905 validation  |
| 6 | 0           | 0.933333333 | -0.066666667 validation |
| 6 | 0           | 1           | 0 validation            |

# GSEA-CD3D

GS follow link to MSigDB

|                                                           | SIZE | ES   | NES  | NOM p-val | FDR q-val | FWER p-val | RANK AT MAX | LEADING EDGE                   |
|-----------------------------------------------------------|------|------|------|-----------|-----------|------------|-------------|--------------------------------|
| KEGG_PARKINSONS_DISEASE                                   | 90   | 0.66 | 2.42 | 0         | 0         | 0          | 1869        | tags=37%, list=7%, signal=39%  |
| KEGG_OXIDATIVE_PHOSPHORYLATION                            | 94   | 0.66 | 2.35 | 0         | 0         | 0          | 1869        | tags=38%, list=7%, signal=41%  |
| KEGG_PROTEASOME                                           | 42   | 0.77 | 2.27 | 0         | 0         | 0          | 1596        | tags=48%, list=6%, signal=51%  |
| KEGG_HUNTINGTONS_DISEASE                                  | 149  | 0.52 | 2.26 | 0         | 0         | 0          | 2987        | tags=32%, list=12%, signal=36% |
| KEGG_RIBOSOME                                             | 85   | 0.88 | 2.26 | 0         | 0         | 0          | 1570        | tags=75%, list=6%, signal=80%  |
| KEGG_ALZHEIMERS_DISEASE                                   | 137  | 0.52 | 2.2  | 0         | 0         | 0.001      | 1957        | tags=25%, list=8%, signal=27%  |
| KEGG_SPLICEOSOME                                          | 103  | 0.53 | 2.14 | 0         | 0         | 0.004      | 2245        | tags=37%, list=9%, signal=40%  |
| KEGG_RNA_DEGRADATION                                      | 51   | 0.6  | 2.12 | 0         | 0         | 0.004      | 2141        | tags=33%, list=9%, signal=36%  |
| KEGG_CARDIAC_MUSCLE_CONTRACTION                           | 69   | 0.53 | 2.11 | 0         | 0         | 0.004      | 641         | tags=14%, list=3%, signal=15%  |
| KEGG_PROTEIN_EXPORT                                       | 21   | 0.81 | 2.1  | 0         | 0         | 0.008      | 1992        | tags=48%, list=8%, signal=52%  |
| KEGG_NUCLEOTIDE_EXCISION_REPAIR                           | 43   | 0.6  | 2.09 | 0         | 0.001     | 0.011      | 3861        | tags=44%, list=15%, signal=52% |
| KEGG_PYRUVATE_METABOLISM                                  | 39   | 0.58 | 2.01 | 0         | 0.002     | 0.027      | 2193        | tags=31%, list=9%, signal=34%  |
| KEGG_RNA_POLYMERASE                                       | 26   | 0.65 | 1.98 | 0.002     | 0.002     | 0.039      | 2987        | tags=50%, list=12%, signal=57% |
| KEGG_PYRIMIDINE_METABOLISM                                | 90   | 0.48 | 1.97 | 0         | 0.002     | 0.042      | 3253        | tags=33%, list=13%, signal=38% |
| KEGG_DNA_REPLICATION                                      | 35   | 0.62 | 1.97 | 0         | 0.002     | 0.046      | 3490        | tags=43%, list=14%, signal=50% |
| KEGG_PROPANOATE_METABOLISM                                | 31   | 0.6  | 1.93 | 0         | 0.004     | 0.07       | 1388        | tags=29%, list=6%, signal=31%  |
| KEGG_BASAL_TRANSCRIPTION_FACTORS                          | 35   | 0.54 | 1.87 | 0         | 0.006     | 0.114      | 3814        | tags=40%, list=15%, signal=47% |
| KEGG_HOMOLOGOUS_RECOMBINATION                             | 23   | 0.6  | 1.84 | 0         | 0.007     | 0.149      | 1704        | tags=26%, list=7%, signal=28%  |
| KEGG_TERPENOID_BACKBONE_BIOSYNTHESIS                      | 15   | 0.67 | 1.83 | 0.002     | 0.008     | 0.165      | 4209        | tags=53%, list=17%, signal=64% |
| KEGG_PURINE_METABOLISM                                    | 142  | 0.41 | 1.83 | 0         | 0.008     | 0.166      | 3382        | tags=25%, list=13%, signal=29% |
| KEGG_MISMATCH_REPAIR                                      | 22   | 0.61 | 1.81 | 0.004     | 0.009     | 0.194      | 4273        | tags=50%, list=17%, signal=60% |
| KEGG_N_GLYCAN_BIOSYNTHESIS                                | 44   | 0.43 | 1.58 | 0.018     | 0.063     | 0.668      | 1489        | tags=20%, list=6%, signal=22%  |
| KEGG_GLYCOSYLPHOSPHATIDYLINOSITOL_GPI_ANCHOR_BIOSYNTHESIS | 25   | 0.48 | 1.58 | 0.026     | 0.061     | 0.671      | 2281        | tags=28%, list=9%, signal=31%  |
| KEGG_VALINE_LEUCINE_AND_ISOLEUCINE_DEGRADATION            | 43   | 0.45 | 1.52 | 0.051     | 0.087     | 0.776      | 3840        | tags=33%, list=15%, signal=38% |
| KEGG_CITRATE_CYCLE_TCA_CYCLE                              | 30   | 0.45 | 1.52 | 0.07      | 0.085     | 0.783      | 3200        | tags=30%, list=13%, signal=34% |
| KEGG_UBIQUITIN_MEDIATED_PROTEOLYSIS                       | 126  | 0.35 | 1.5  | 0.029     | 0.09      | 0.814      | 3457        | tags=25%, list=14%, signal=28% |
| KEGG_SNARE_INTERACTIONS_IN_VESICULAR_TRANSPORT            | 37   | 0.39 | 1.48 | 0.035     | 0.096     | 0.844      | 2130        | tags=22%, list=8%, signal=24%  |
| KEGG_BASE_EXCISION_REPAIR                                 | 32   | 0.45 | 1.45 | 0.077     | 0.11      | 0.878      | 3767        | tags=38%, list=15%, signal=44% |
| KEGG_BUTANOATE_METABOLISM                                 | 34   | 0.42 | 1.44 | 0.063     | 0.116     | 0.893      | 2637        | tags=21%, list=10%, signal=23% |
| KEGG_METABOLISM_OF_XENOBIOTICS_BY_CYTOCHROME_P450         | 70   | 0.37 | 1.44 | 0.029     | 0.113     | 0.895      | 5216        | tags=27%, list=21%, signal=34% |
| KEGG_TRYPTOPHAN_METABOLISM                                | 36   | 0.38 | 1.41 | 0.061     | 0.129     | 0.926      | 3840        | tags=19%, list=15%, signal=23% |
| KEGG_PEROXISOME                                           | 73   | 0.34 | 1.39 | 0.057     | 0.142     | 0.943      | 5464        | tags=34%, list=22%, signal=44% |
| KEGG_GLYOXYLATE_AND_DICARBOXYLATE_METABOLISM              | 15   | 0.49 | 1.38 | 0.122     | 0.143     | 0.949      | 1743        | tags=20%, list=7%, signal=21%  |
| KEGG_REGULATION_OF_AUTOPHAGY                              | 34   | 0.38 | 1.31 | 0.144     | 0.198     | 0.982      | 2716        | tags=24%, list=11%, signal=26% |
| KEGG_DRUG_METABOLISM_CYTOCHROME_P450                      | 72   | 0.31 | 1.26 | 0.113     | 0.249     | 0.995      | 5216        | tags=24%, list=21%, signal=30% |
| KEGG_CYSTEINE_AND_METHIONINE_METABOLISM                   | 34   | 0.36 | 1.25 | 0.182     | 0.25      | 0.995      | 3643        | tags=21%, list=14%, signal=24% |
| KEGG_ALLOGRAFT_REJECTION                                  | 37   | 0.37 | 1.23 | 0.198     | 0.265     | 0.996      | 2992        | tags=24%, list=12%, signal=28% |
| KEGG_GLUTATHIONE_METABOLISM                               | 49   | 0.33 | 1.22 | 0.201     | 0.276     | 0.996      | 3546        | tags=24%, list=14%, signal=28% |
| KEGG_PROXIMAL_TUBULE_BICARBONATE_RECLAMATION              | 23   | 0.36 | 1.2  | 0.201     | 0.292     | 0.998      | 5279        | tags=30%, list=21%, signal=38% |
| KEGG_OOCYTE_MEIOSIS                                       | 108  | 0.28 | 1.19 | 0.188     | 0.288     | 0.998      | 2577        | tags=19%, list=10%, signal=22% |
| KEGG_AUTOIMMUNE_THYROID_DISEASE                           | 52   | 0.32 | 1.19 | 0.242     | 0.287     | 0.999      | 2992        | tags=21%, list=12%, signal=24% |
| KEGG_CYTOSOLIC_DNA_SENSING_PATHWAY                        | 52   | 0.32 | 1.17 | 0.224     | 0.299     | 0.999      | 3532        | tags=29%, list=14%, signal=33% |
| KEGG_TYPE_I_DIABETES_MELLITUS                             | 43   | 0.33 | 1.16 | 0.269     | 0.308     | 1          | 2100        | tags=19%, list=8%, signal=20%  |
| KEGG_ONE_CARBON_POOL_BY_FOLATE                            | 17   | 0.39 | 1.12 | 0.318     | 0.353     | 1          | 2521        | tags=18%, list=10%, signal=20% |
| KEGG_ALANINE ASPARTATE AND GLUTAMATE METABOLISM           | 30   | 0.32 | 1.09 | 0.334     | 0.398     | 1          | 5464        | tags=33%, list=22%, signal=43% |
| KEGG_SYSTEMIC_LUPUS_ERYTHEMATOSUS                         | 56   | 0.28 | 1.08 | 0.329     | 0.4       | 1          | 2992        | tags=18%, list=12%, signal=20% |

|                                                                 |     |       |       |       |       |       |                                     |
|-----------------------------------------------------------------|-----|-------|-------|-------|-------|-------|-------------------------------------|
| KEGG_ASTHMA                                                     | 30  | 0.34  | 1.07  | 0.378 | 0.408 | 1     | 3020 tags=17%, list=12%, signal=19% |
| KEGG_GRAFT_VERSUS_HOST_DISEASE                                  | 40  | 0.32  | 1.07  | 0.349 | 0.402 | 1     | 1957 tags=18%, list=8%, signal=19%  |
| KEGG_CELL_CYCLE                                                 | 114 | 0.25  | 0.98  | 0.465 | 0.528 | 1     | 2577 tags=18%, list=10%, signal=19% |
| KEGG_PRIMARY_IMMUNODEFICIENCY                                   | 35  | 0.3   | 0.94  | 0.521 | 0.588 | 1     | 981 tags=6%, list=4%, signal=6%     |
| KEGG_INTESTINAL_IMMUNE_NETWORK_FOR_IGA_PRODUCTION               | 48  | 0.26  | 0.89  | 0.597 | 0.672 | 1     | 2992 tags=15%, list=12%, signal=17% |
| KEGG_PENTOSE_AND_GLUCURONATE_INTERCONVERSIONS                   | 27  | 0.25  | 0.86  | 0.665 | 0.723 | 1     | 4528 tags=22%, list=18%, signal=27% |
| KEGG_TYROSINE_METABOLISM                                        | 40  | 0.21  | 0.8   | 0.802 | 0.808 | 1     | 4960 tags=23%, list=20%, signal=28% |
| KEGG_ECM_RECEPTOR_INTERACTION                                   | 82  | 0.19  | 0.78  | 0.855 | 0.825 | 1     | 6436 tags=27%, list=26%, signal=36% |
| KEGG_O_GLYCAN_BIOSYNTHESIS                                      | 25  | 0.24  | 0.78  | 0.79  | 0.819 | 1     | 4590 tags=28%, list=18%, signal=34% |
| KEGG_AMINOACYL_TRNA_BIOSYNTHESIS                                | 22  | 0.24  | 0.74  | 0.791 | 0.858 | 1     | 3880 tags=18%, list=15%, signal=21% |
| KEGG_PRIMARY_BILE_ACID_BIOSYNTHESIS                             | 16  | 0.25  | 0.74  | 0.828 | 0.848 | 1     | 1305 tags=13%, list=5%, signal=13%  |
| KEGG_FC_GAMMA_R_MEDIATED_PHAGOCYTOSIS                           | 88  | -0.64 | -2.45 | 0     | 0     | 0     | 1908 tags=39%, list=8%, signal=42%  |
| KEGG_ACUTE_MYELOID_LEUKEMIA                                     | 56  | -0.66 | -2.42 | 0     | 0     | 0     | 3521 tags=50%, list=14%, signal=58% |
| KEGG_CHRONIC_MYELOID_LEUKEMIA                                   | 72  | -0.65 | -2.41 | 0     | 0     | 0     | 3521 tags=50%, list=14%, signal=58% |
| KEGG_B_CELL_RECEPTOR_SIGNALING_PATHWAY                          | 73  | -0.66 | -2.38 | 0     | 0     | 0     | 3558 tags=51%, list=14%, signal=59% |
| KEGG_NEUROTROPHIN_SIGNALING_PATHWAY                             | 124 | -0.58 | -2.38 | 0     | 0     | 0     | 3521 tags=47%, list=14%, signal=54% |
| KEGG_CHEMOKINE_SIGNALING_PATHWAY                                | 181 | -0.54 | -2.37 | 0     | 0     | 0     | 3810 tags=38%, list=15%, signal=44% |
| KEGG_FC_EPSILON_RI_SIGNALING_PATHWAY                            | 76  | -0.61 | -2.35 | 0     | 0     | 0     | 3521 tags=39%, list=14%, signal=46% |
| KEGG_INSULIN_SIGNALING_PATHWAY                                  | 133 | -0.56 | -2.35 | 0     | 0     | 0     | 2774 tags=38%, list=11%, signal=42% |
| KEGG_LEUKOCYTE_TRANSENDOTHELIAL_MIGRATION                       | 108 | -0.56 | -2.34 | 0     | 0     | 0     | 1908 tags=29%, list=8%, signal=31%  |
| KEGG_ERBB_SIGNALING_PATHWAY                                     | 84  | -0.59 | -2.33 | 0     | 0     | 0     | 3521 tags=44%, list=14%, signal=51% |
| KEGG_NON_SMALL_CELL_LUNG_CANCER                                 | 53  | -0.67 | -2.32 | 0     | 0     | 0     | 2144 tags=43%, list=9%, signal=47%  |
| KEGG_PANCREATIC_CANCER                                          | 69  | -0.6  | -2.29 | 0     | 0     | 0     | 2148 tags=38%, list=9%, signal=41%  |
| KEGG_TOLL_LIKE_RECEPTOR_SIGNALING_PATHWAY                       | 99  | -0.56 | -2.25 | 0     | 0     | 0     | 3505 tags=40%, list=14%, signal=47% |
| KEGG_RENAL_CELL_CARCINOMA                                       | 66  | -0.59 | -2.21 | 0     | 0     | 0     | 2707 tags=44%, list=11%, signal=49% |
| KEGG_LEISHMANIA_INFECTION                                       | 68  | -0.6  | -2.21 | 0     | 0     | 0     | 1748 tags=35%, list=7%, signal=38%  |
| KEGG_LONG_TERM_DEPRESSION                                       | 64  | -0.54 | -2.2  | 0     | 0     | 0     | 2715 tags=27%, list=11%, signal=30% |
| KEGG_REGULATION_OF_ACTIN_CYTOSKELETON                           | 200 | -0.48 | -2.2  | 0     | 0     | 0     | 3621 tags=33%, list=14%, signal=38% |
| KEGG_VEGF_SIGNALING_PATHWAY                                     | 72  | -0.55 | -2.2  | 0     | 0     | 0     | 4884 tags=44%, list=19%, signal=55% |
| KEGG_PROSTATE_CANCER                                            | 88  | -0.55 | -2.19 | 0     | 0     | 0     | 3521 tags=41%, list=14%, signal=47% |
| KEGG_MAPK_SIGNALING_PATHWAY                                     | 256 | -0.47 | -2.18 | 0     | 0     | 0     | 3202 tags=29%, list=13%, signal=33% |
| KEGG_DORSO_VENTRAL_AXIS_FORMATION                               | 24  | -0.71 | -2.18 | 0     | 0     | 0     | 3521 tags=54%, list=14%, signal=63% |
| KEGG_ADIPOCYTOKINE_SIGNALING_PATHWAY                            | 65  | -0.55 | -2.18 | 0     | 0     | 0     | 2774 tags=32%, list=11%, signal=36% |
| KEGG_NOTCH_SIGNALING_PATHWAY                                    | 44  | -0.64 | -2.18 | 0     | 0     | 0.001 | 2513 tags=36%, list=10%, signal=40% |
| KEGG_GAP_JUNCTION                                               | 83  | -0.53 | -2.18 | 0     | 0     | 0.001 | 3790 tags=35%, list=15%, signal=41% |
| KEGG_BLADDER_CANCER                                             | 39  | -0.63 | -2.17 | 0     | 0     | 0.001 | 3521 tags=46%, list=14%, signal=54% |
| KEGG_ADHERENS_JUNCTION                                          | 68  | -0.56 | -2.17 | 0     | 0     | 0.001 | 3790 tags=41%, list=15%, signal=48% |
| KEGG_ENDOCYTOSIS                                                | 161 | -0.49 | -2.17 | 0     | 0     | 0.001 | 4085 tags=40%, list=16%, signal=48% |
| KEGG_LYSOSOME                                                   | 116 | -0.57 | -2.13 | 0     | 0     | 0.002 | 3239 tags=40%, list=13%, signal=45% |
| KEGG_GLIOMA                                                     | 63  | -0.57 | -2.13 | 0     | 0     | 0.002 | 3521 tags=40%, list=14%, signal=46% |
| KEGG_GNRH_SIGNALING_PATHWAY                                     | 98  | -0.51 | -2.12 | 0     | 0     | 0.002 | 5099 tags=44%, list=20%, signal=55% |
| KEGG_PATHWAYS_IN_CANCER                                         | 316 | -0.44 | -2.12 | 0     | 0     | 0.003 | 3523 tags=30%, list=14%, signal=34% |
| KEGG_ENDOMETRIAL_CANCER                                         | 52  | -0.59 | -2.07 | 0     | 0     | 0.009 | 3521 tags=42%, list=14%, signal=49% |
| KEGG_EPITHELIAL_CELL_SIGNALING_IN_HELICOBACTER_PYLORI_INFECTION | 65  | -0.51 | -2.06 | 0     | 0     | 0.011 | 2034 tags=37%, list=8%, signal=40%  |
| KEGG_FOCAL_ADHESION                                             | 189 | -0.44 | -2    | 0     | 0.001 | 0.02  | 2034 tags=23%, list=8%, signal=25%  |
| KEGG_COLORECTAL_CANCER                                          | 62  | -0.52 | -1.98 | 0     | 0.001 | 0.029 | 3521 tags=37%, list=14%, signal=43% |
| KEGG_APOPTOSIS                                                  | 84  | -0.47 | -1.97 | 0     | 0.002 | 0.035 | 3505 tags=37%, list=14%, signal=43% |

|                                                     |     |       |       |       |       |       |      |           |           |            |
|-----------------------------------------------------|-----|-------|-------|-------|-------|-------|------|-----------|-----------|------------|
| KEGG_TYPE_II_DIABETES_MELLITUS                      | 44  | -0.54 | -1.96 | 0     | 0.002 | 0.041 | 5808 | tags=50%, | list=23%, | signal=65% |
| KEGG_JAK_STAT_SIGNALING_PATHWAY                     | 149 | -0.44 | -1.94 | 0     | 0.002 | 0.054 | 4832 | tags=34%, | list=19%, | signal=42% |
| KEGG_GLYCOSAMINOGLYCAN_DEGRADATION                  | 21  | -0.65 | -1.94 | 0.002 | 0.002 | 0.055 | 5595 | tags=57%, | list=22%, | signal=73% |
| KEGG_MELANOGENESIS                                  | 100 | -0.46 | -1.93 | 0     | 0.002 | 0.057 | 3521 | tags=27%, | list=14%, | signal=31% |
| KEGG_INOSITOL_PHOSPHATE_METABOLISM                  | 49  | -0.53 | -1.89 | 0.002 | 0.004 | 0.093 | 5584 | tags=53%, | list=22%, | signal=68% |
| KEGG_SPHINGOLIPID_METABOLISM                        | 31  | -0.54 | -1.88 | 0     | 0.005 | 0.107 | 3744 | tags=35%, | list=15%, | signal=42% |
| KEGG_TIGHT_JUNCTION                                 | 122 | -0.42 | -1.85 | 0     | 0.006 | 0.133 | 3790 | tags=26%, | list=15%, | signal=31% |
| KEGG_GLYCEROPHOSPHOLIPID_METABOLISM                 | 63  | -0.49 | -1.85 | 0.002 | 0.006 | 0.138 | 5409 | tags=43%, | list=22%, | signal=54% |
| KEGG_AXON_GUIDANCE                                  | 126 | -0.41 | -1.83 | 0     | 0.007 | 0.165 | 4887 | tags=33%, | list=19%, | signal=40% |
| KEGG_PHOSPHATIDYLINOSITOL_SIGNALING_SYSTEM          | 70  | -0.49 | -1.83 | 0.004 | 0.007 | 0.169 | 5584 | tags=44%, | list=22%, | signal=57% |
| KEGG_NATURAL_KILLER_CELL_MEDIATED_CYTOTOXICITY      | 133 | -0.43 | -1.83 | 0.002 | 0.008 | 0.179 | 2991 | tags=29%, | list=12%, | signal=33% |
| KEGG_GALACTOSE_METABOLISM                           | 25  | -0.55 | -1.82 | 0.008 | 0.008 | 0.184 | 2444 | tags=36%, | list=10%, | signal=40% |
| KEGG_MTOR_SIGNALING_PATHWAY                         | 47  | -0.49 | -1.8  | 0.008 | 0.009 | 0.219 | 2180 | tags=30%, | list=9%,  | signal=33% |
| KEGG_THYROID_CANCER                                 | 29  | -0.55 | -1.78 | 0.006 | 0.011 | 0.249 | 6607 | tags=59%, | list=26%, | signal=79% |
| KEGG_FRUCTOSE_AND_MANNOSE_METABOLISM                | 32  | -0.56 | -1.77 | 0.006 | 0.011 | 0.258 | 4577 | tags=50%, | list=18%, | signal=61% |
| KEGG_LONG_TERM_POTENTIATION                         | 68  | -0.43 | -1.75 | 0     | 0.014 | 0.306 | 2144 | tags=22%, | list=9%,  | signal=24% |
| KEGG_NOD_LIKE_RECEPTOR_SIGNALING_PATHWAY            | 55  | -0.49 | -1.75 | 0.002 | 0.013 | 0.308 | 3064 | tags=40%, | list=12%, | signal=45% |
| KEGG_ALDOSTERONE_REGULATED_SODIUM_REABSORPTION      | 40  | -0.49 | -1.74 | 0.004 | 0.015 | 0.328 | 5138 | tags=38%, | list=20%, | signal=47% |
| KEGG_VIRAL_MYOCARDITIS                              | 70  | -0.46 | -1.74 | 0.008 | 0.015 | 0.339 | 3726 | tags=30%, | list=15%, | signal=35% |
| KEGG_PENTOSE_PHOSPHATE_PATHWAY                      | 26  | -0.55 | -1.73 | 0.016 | 0.015 | 0.347 | 4011 | tags=42%, | list=16%, | signal=50% |
| KEGG_GLYCOSAMINOGLYCAN_BIOSYNTHESIS_HEPARAN_SULFATE | 26  | -0.5  | -1.73 | 0.01  | 0.016 | 0.354 | 4104 | tags=35%, | list=16%, | signal=41% |
| KEGG_STARCH_AND_SUCROSE_METABOLISM                  | 51  | -0.46 | -1.72 | 0.013 | 0.016 | 0.359 | 3374 | tags=25%, | list=13%, | signal=29% |
| KEGG_ABC_TRANSPORTERS                               | 44  | -0.46 | -1.71 | 0     | 0.018 | 0.398 | 3676 | tags=32%, | list=15%, | signal=37% |
| KEGG_NICOTINATE_AND_NICOTINAMIDE_METABOLISM         | 21  | -0.55 | -1.7  | 0.006 | 0.02  | 0.427 | 5855 | tags=48%, | list=23%, | signal=62% |
| KEGG_T_CELL_RECEPTOR_SIGNALING_PATHWAY              | 106 | -0.42 | -1.69 | 0.004 | 0.02  | 0.44  | 3558 | tags=37%, | list=14%, | signal=43% |
| KEGG_WNT_SIGNALING_PATHWAY                          | 147 | -0.39 | -1.69 | 0.004 | 0.02  | 0.444 | 6812 | tags=44%, | list=27%, | signal=59% |
| KEGG_GLYCEROLIPID_METABOLISM                        | 40  | -0.45 | -1.65 | 0.014 | 0.026 | 0.525 | 2444 | tags=25%, | list=10%, | signal=28% |
| KEGG_VASCULAR_SMOOTH_MUSCLE_CONTRACTION             | 109 | -0.37 | -1.64 | 0.004 | 0.028 | 0.557 | 5099 | tags=32%, | list=20%, | signal=40% |
| KEGG_MELANOMA                                       | 71  | -0.41 | -1.62 | 0.008 | 0.032 | 0.591 | 3521 | tags=25%, | list=14%, | signal=29% |
| KEGG_COMPLEMENT_AND_COAGULATION_CASCADES            | 68  | -0.43 | -1.61 | 0.01  | 0.033 | 0.608 | 4094 | tags=26%, | list=16%, | signal=32% |
| KEGG_PANTOTHENATE_AND_COA_BIOSYNTHESIS              | 16  | -0.54 | -1.61 | 0.016 | 0.033 | 0.612 | 3622 | tags=44%, | list=14%, | signal=51% |
| KEGG_PATHOGENIC_ESCHERICHIA_COLI_INFECTION          | 52  | -0.41 | -1.57 | 0.017 | 0.042 | 0.686 | 5255 | tags=46%, | list=21%, | signal=58% |
| KEGG_RENIN_ANGIOTENSIN_SYSTEM                       | 17  | -0.55 | -1.57 | 0.019 | 0.042 | 0.688 | 376  | tags=18%, | list=1%,  | signal=18% |
| KEGG_CYTOKINE_CYTOKINE_RECEPTOR_INTERACTION         | 253 | -0.32 | -1.57 | 0.004 | 0.044 | 0.7   | 4212 | tags=23%, | list=17%, | signal=27% |
| KEGG_VIBRIO_CHOLERAE_INFECTION                      | 52  | -0.42 | -1.57 | 0.024 | 0.043 | 0.703 | 1280 | tags=27%, | list=5%,  | signal=28% |
| KEGG_HEMATOPOIETIC_CELL_LINEAGE                     | 86  | -0.37 | -1.56 | 0.01  | 0.044 | 0.711 | 3698 | tags=31%, | list=15%, | signal=37% |
| KEGG_VASOPRESSIN_REGULATED_WATER_REABSORPTION       | 44  | -0.4  | -1.53 | 0.018 | 0.051 | 0.757 | 5099 | tags=45%, | list=20%, | signal=57% |
| KEGG_CALCIIUM_SIGNALING_PATHWAY                     | 171 | -0.32 | -1.51 | 0.01  | 0.059 | 0.797 | 5769 | tags=32%, | list=23%, | signal=41% |
| KEGG_PRION_DISEASES                                 | 35  | -0.41 | -1.5  | 0.031 | 0.064 | 0.83  | 2612 | tags=29%, | list=10%, | signal=32% |
| KEGG_PPAR_SIGNALING_PATHWAY                         | 68  | -0.35 | -1.43 | 0.055 | 0.092 | 0.898 | 2935 | tags=25%, | list=12%, | signal=28% |
| KEGG_TASTE_TRANSDUCTION                             | 48  | -0.38 | -1.43 | 0.049 | 0.095 | 0.909 | 7345 | tags=44%, | list=29%, | signal=62% |
| KEGG_PROGESTERONE_MEDIATED_OOCYTE_MATURATION        | 84  | -0.34 | -1.42 | 0.042 | 0.097 | 0.918 | 5315 | tags=40%, | list=21%, | signal=51% |
| KEGG_AMINO_SUGAR_AND_NUCLEOTIDE_SUGAR_METABOLISM    | 41  | -0.4  | -1.41 | 0.08  | 0.102 | 0.924 | 3185 | tags=29%, | list=13%, | signal=33% |
| KEGG_GLYCOLYSIS_GLUconeogenesis                     | 60  | -0.36 | -1.4  | 0.067 | 0.104 | 0.935 | 2201 | tags=22%, | list=9%,  | signal=24% |
| KEGG_RIG_I_LIKE_RECEPTOR_SIGNALING_PATHWAY          | 64  | -0.36 | -1.39 | 0.077 | 0.114 | 0.952 | 3476 | tags=23%, | list=14%, | signal=27% |
| KEGG_SMALL_CELL_LUNG_CANCER                         | 82  | -0.34 | -1.36 | 0.083 | 0.128 | 0.966 | 2095 | tags=20%, | list=8%,  | signal=21% |
| KEGG_BASAL_CELL_CARCINOMA                           | 55  | -0.34 | -1.35 | 0.082 | 0.139 | 0.973 | 7510 | tags=45%, | list=30%, | signal=65% |

|                                                               |     |       |       |       |       |       |                                     |
|---------------------------------------------------------------|-----|-------|-------|-------|-------|-------|-------------------------------------|
| KEGG_TGF_BETA_SIGNALING_PATHWAY                               | 84  | -0.33 | -1.34 | 0.07  | 0.141 | 0.975 | 3356 tags=21%, list=13%, signal=25% |
| KEGG_BIOSYNTHESIS_OF_UNSATURATED_FATTY_ACIDS                  | 19  | -0.46 | -1.34 | 0.143 | 0.142 | 0.977 | 2327 tags=32%, list=9%, signal=35%  |
| KEGG_GLYCOSAMINOGLYCAN_BIOSYNTHESIS_CHONDROITIN_SULFATE       | 20  | -0.43 | -1.33 | 0.1   | 0.146 | 0.979 | 6818 tags=40%, list=27%, signal=55% |
| KEGG_DILATED_CARDIOMYOPATHY                                   | 90  | -0.31 | -1.32 | 0.072 | 0.152 | 0.981 | 6442 tags=34%, list=26%, signal=46% |
| KEGG_AMYOTROPHIC_LATERAL_SCLEROSIS_ALS                        | 52  | -0.33 | -1.32 | 0.07  | 0.152 | 0.983 | 3326 tags=25%, list=13%, signal=29% |
| KEGG_ARACHIDONIC_ACID_METABOLISM                              | 55  | -0.32 | -1.3  | 0.088 | 0.162 | 0.987 | 5086 tags=27%, list=20%, signal=34% |
| KEGG_CELL_ADHESION_MOLECULES_CAMS                             | 130 | -0.29 | -1.3  | 0.069 | 0.166 | 0.987 | 2950 tags=17%, list=12%, signal=19% |
| KEGG_ARRHYTHMOGENIC_RIGHT_VENTRICULAR_CARDIOMYOPATHY_ARVC     | 74  | -0.31 | -1.28 | 0.083 | 0.179 | 0.988 | 8411 tags=49%, list=33%, signal=73% |
| KEGG_ALPHA_LINOLENIC_ACID_METABOLISM                          | 17  | -0.41 | -1.21 | 0.226 | 0.245 | 0.997 | 2715 tags=18%, list=11%, signal=20% |
| KEGG_RETINOL_METABOLISM                                       | 62  | -0.29 | -1.18 | 0.176 | 0.27  | 0.998 | 5832 tags=27%, list=23%, signal=36% |
| KEGG_LYSINE_DEGRADATION                                       | 39  | -0.33 | -1.17 | 0.249 | 0.287 | 0.998 | 3365 tags=28%, list=13%, signal=33% |
| KEGG_DRUG_METABOLISM_OTHER_ENZYMES                            | 48  | -0.31 | -1.16 | 0.269 | 0.296 | 0.998 | 5503 tags=33%, list=22%, signal=43% |
| KEGG_P53_SIGNALING_PATHWAY                                    | 64  | -0.31 | -1.15 | 0.278 | 0.305 | 0.999 | 3502 tags=22%, list=14%, signal=25% |
| KEGG_HYPERTROPHIC_CARDIOMYOPATHY_HCM                          | 83  | -0.26 | -1.15 | 0.215 | 0.305 | 0.999 | 6442 tags=30%, list=26%, signal=40% |
| KEGG_ETHER_LIPID_METABOLISM                                   | 27  | -0.34 | -1.13 | 0.306 | 0.318 | 1     | 2715 tags=19%, list=11%, signal=21% |
| KEGG_HEDGEHOG_SIGNALING_PATHWAY                               | 56  | -0.28 | -1.12 | 0.269 | 0.328 | 1     | 7150 tags=34%, list=28%, signal=47% |
| KEGG_FATTY_ACID_METABOLISM                                    | 40  | -0.3  | -1.12 | 0.294 | 0.334 | 1     | 2327 tags=25%, list=9%, signal=28%  |
| KEGG_NITROGEN_METABOLISM                                      | 23  | -0.34 | -1.09 | 0.329 | 0.366 | 1     | 5484 tags=35%, list=22%, signal=44% |
| KEGG_ANTIGEN_PROCESSING_AND_PRESENTATION                      | 86  | -0.29 | -1.08 | 0.354 | 0.369 | 1     | 3946 tags=24%, list=16%, signal=29% |
| KEGG_SELENOAMINO_ACID_METABOLISM                              | 24  | -0.33 | -1.05 | 0.39  | 0.416 | 1     | 3058 tags=25%, list=12%, signal=28% |
| KEGG_BETA_ALANINE_METABOLISM                                  | 22  | -0.33 | -1.03 | 0.406 | 0.435 | 1     | 3361 tags=27%, list=13%, signal=31% |
| KEGG_HISTIDINE_METABOLISM                                     | 27  | -0.31 | -1.03 | 0.415 | 0.437 | 1     | 1638 tags=15%, list=7%, signal=16%  |
| KEGG_ASCORBATE_AND_ALDARATE_METABOLISM                        | 25  | -0.31 | -1.03 | 0.411 | 0.436 | 1     | 4607 tags=24%, list=18%, signal=29% |
| KEGG_LINOLEIC_ACID_METABOLISM                                 | 27  | -0.3  | -1.02 | 0.418 | 0.442 | 1     | 4946 tags=30%, list=20%, signal=37% |
| KEGG_PHENYLALANINE_METABOLISM                                 | 17  | -0.33 | -1.02 | 0.428 | 0.441 | 1     | 3098 tags=18%, list=12%, signal=20% |
| KEGG_MATURITY_ONSET_DIABETES_OF_THE_YOUNG                     | 20  | -0.33 | -1.01 | 0.429 | 0.451 | 1     | 9558 tags=55%, list=38%, signal=89% |
| KEGG_GLYCOSPHINGOLIPID_BIOSYNTHESIS_LACTO_AND_NEOLACTO_SERIES | 25  | -0.29 | -0.97 | 0.506 | 0.517 | 1     | 6295 tags=32%, list=25%, signal=43% |
| KEGG_GLYCINE_SERINE_AND_THREONINE_METABOLISM                  | 31  | -0.27 | -0.92 | 0.584 | 0.593 | 1     | 6003 tags=32%, list=24%, signal=42% |
| KEGG_ARGININE_AND_PROLINE_METABOLISM                          | 50  | -0.23 | -0.88 | 0.656 | 0.666 | 1     | 5706 tags=24%, list=23%, signal=31% |
| KEGG_GLYCOSPHINGOLIPID_BIOSYNTHESIS_GANGLIO_SERIES            | 15  | -0.29 | -0.87 | 0.646 | 0.669 | 1     | 1259 tags=13%, list=5%, signal=14%  |
| KEGG_NEUROACTIVE_LIGAND_RECEPTOR_INTERACTION                  | 256 | -0.18 | -0.85 | 0.796 | 0.698 | 1     | 6555 tags=22%, list=26%, signal=29% |
| KEGG_PORPHYRIN_AND_CHLOROPHYLL_METABOLISM                     | 39  | -0.24 | -0.82 | 0.704 | 0.747 | 1     | 4826 tags=23%, list=19%, signal=29% |
| KEGG_STEROID_HORMONE_BIOSYNTHESIS                             | 55  | -0.2  | -0.79 | 0.851 | 0.787 | 1     | 4755 tags=22%, list=19%, signal=27% |
| KEGG_STEROID_BIOSYNTHESIS                                     | 15  | -0.23 | -0.62 | 0.917 | 0.965 | 1     | 6317 tags=40%, list=25%, signal=53% |
| KEGG_OLFACTORY_TRANSDUCTION                                   | 379 | -0.11 | -0.53 | 1     | 0.988 | 1     | 5958 tags=17%, list=24%, signal=22% |

# GSEA-IL2RG

GS follow link to MSigDB

|                                                           | SIZE | ES   | NES  | NOM p-val | FDR   | q-val | FWER  | p-val | RANK AT MAX | LEADING EDGE                    |
|-----------------------------------------------------------|------|------|------|-----------|-------|-------|-------|-------|-------------|---------------------------------|
| KEGG_BASAL_CELL_CARCINOMA                                 | 55   | 0.5  | 1.96 | 0         | 0.052 | 0.038 | 0.038 | 0.038 | 4805        | tags=36%, list=19%, signal=45%  |
| KEGG_FRUCTOSE_AND_MANNANOSE_METABOLISM                    | 32   | 0.55 | 1.79 | 0.008     | 0.188 | 0.21  | 0.21  | 0.21  | 6652        | tags=47%, list=26%, signal=64%  |
| KEGG_PRIMARY_IMMUNODEFICIENCY                             | 35   | 0.56 | 1.79 | 0.014     | 0.136 | 0.221 | 0.221 | 0.221 | 1480        | tags=20%, list=6%, signal=21%   |
| KEGG_INOSITOL_PHOSPHATE_METABOLISM                        | 49   | 0.48 | 1.71 | 0.017     | 0.208 | 0.368 | 0.368 | 0.368 | 3132        | tags=35%, list=12%, signal=40%  |
| KEGG_GALACTOSE_METABOLISM                                 | 25   | 0.51 | 1.71 | 0.01      | 0.167 | 0.369 | 0.369 | 0.369 | 2562        | tags=24%, list=10%, signal=27%  |
| KEGG_VEGF_SIGNALING_PATHWAY                               | 72   | 0.43 | 1.7  | 0.007     | 0.151 | 0.381 | 0.381 | 0.381 | 4767        | tags=39%, list=19%, signal=48%  |
| KEGG_GLYCOSAMINOGLYCAN_DEGRADATION                        | 21   | 0.57 | 1.69 | 0.024     | 0.135 | 0.394 | 0.394 | 0.394 | 8569        | tags=71%, list=34%, signal=108% |
| KEGG_NOTCH_SIGNALING_PATHWAY                              | 44   | 0.49 | 1.66 | 0.013     | 0.167 | 0.498 | 0.498 | 0.498 | 3611        | tags=30%, list=14%, signal=34%  |
| KEGG_MAPK_SIGNALING_PATHWAY                               | 256  | 0.35 | 1.63 | 0.006     | 0.182 | 0.554 | 0.554 | 0.554 | 5123        | tags=32%, list=20%, signal=40%  |
| KEGG_AXON_GUIDANCE                                        | 126  | 0.35 | 1.6  | 0.006     | 0.207 | 0.615 | 0.615 | 0.615 | 4865        | tags=30%, list=19%, signal=37%  |
| KEGG_GLYCEROPHOSPHOLIPID_METABOLISM                       | 63   | 0.41 | 1.56 | 0.025     | 0.259 | 0.718 | 0.718 | 0.718 | 4986        | tags=38%, list=20%, signal=47%  |
| KEGG_HOMOLOGOUS_RECOMBINATION                             | 23   | 0.49 | 1.5  | 0.045     | 0.331 | 0.798 | 0.798 | 0.798 | 1973        | tags=30%, list=8%, signal=33%   |
| KEGG_LINOLEIC_ACID_METABOLISM                             | 27   | 0.45 | 1.5  | 0.048     | 0.324 | 0.82  | 0.82  | 0.82  | 5440        | tags=37%, list=22%, signal=47%  |
| KEGG_GLYCOSAMINOGLYCAN_BIOSYNTHESIS_CHONDROITIN_SULFATE   | 20   | 0.48 | 1.49 | 0.063     | 0.319 | 0.836 | 0.836 | 0.836 | 1856        | tags=25%, list=7%, signal=27%   |
| KEGG_TIGHT_JUNCTION                                       | 122  | 0.33 | 1.47 | 0.017     | 0.333 | 0.861 | 0.861 | 0.861 | 3508        | tags=21%, list=14%, signal=25%  |
| KEGG_MELANOGENESIS                                        | 100  | 0.34 | 1.46 | 0.016     | 0.322 | 0.866 | 0.866 | 0.866 | 6138        | tags=36%, list=24%, signal=47%  |
| KEGG_PHOSPHATIDYLINOSITOL_SIGNALING_SYSTEM                | 70   | 0.38 | 1.44 | 0.075     | 0.347 | 0.891 | 0.891 | 0.891 | 3132        | tags=29%, list=12%, signal=33%  |
| KEGG_GLUTATHIONE_METABOLISM                               | 49   | 0.38 | 1.44 | 0.054     | 0.334 | 0.895 | 0.895 | 0.895 | 2594        | tags=22%, list=10%, signal=25%  |
| KEGG_HEMATOPOIETIC_CELL_LINEAGE                           | 86   | 0.33 | 1.43 | 0.033     | 0.325 | 0.9   | 0.9   | 0.9   | 3674        | tags=20%, list=15%, signal=23%  |
| KEGG_ACUTE_MYELOID_LEUKEMIA                               | 56   | 0.39 | 1.41 | 0.098     | 0.347 | 0.914 | 0.914 | 0.914 | 2112        | tags=23%, list=8%, signal=25%   |
| KEGG_STEROID_BIOSYNTHESIS                                 | 15   | 0.52 | 1.4  | 0.103     | 0.35  | 0.924 | 0.924 | 0.924 | 1693        | tags=33%, list=7%, signal=36%   |
| KEGG_GLYCEROLIPID_METABOLISM                              | 40   | 0.37 | 1.39 | 0.059     | 0.344 | 0.929 | 0.929 | 0.929 | 4677        | tags=33%, list=19%, signal=40%  |
| KEGG_STARCH_AND_SUCROSE_METABOLISM                        | 51   | 0.38 | 1.39 | 0.094     | 0.341 | 0.939 | 0.939 | 0.939 | 3552        | tags=24%, list=14%, signal=27%  |
| KEGG_FC_GAMMA_R_MEDIATED_PHAGOCYTOSIS                     | 88   | 0.36 | 1.38 | 0.1       | 0.335 | 0.941 | 0.941 | 0.941 | 5125        | tags=39%, list=20%, signal=48%  |
| KEGG_ENDOCYTOSIS                                          | 161  | 0.31 | 1.38 | 0.052     | 0.328 | 0.945 | 0.945 | 0.945 | 3772        | tags=25%, list=15%, signal=29%  |
| KEGG_CALCIIUM_SIGNALING_PATHWAY                           | 171  | 0.29 | 1.38 | 0.023     | 0.318 | 0.945 | 0.945 | 0.945 | 4632        | tags=27%, list=18%, signal=33%  |
| KEGG_TASTE_TRANSDUCTION                                   | 48   | 0.37 | 1.37 | 0.084     | 0.311 | 0.949 | 0.949 | 0.949 | 6371        | tags=38%, list=25%, signal=50%  |
| KEGG_CYTOKINE_CYTOKINE_RECEPTOR_INTERACTION               | 253  | 0.28 | 1.37 | 0.029     | 0.303 | 0.949 | 0.949 | 0.949 | 4897        | tags=21%, list=19%, signal=25%  |
| KEGG_DRUG_METABOLISM_CYTOCHROME_P450                      | 72   | 0.33 | 1.37 | 0.052     | 0.297 | 0.949 | 0.949 | 0.949 | 5577        | tags=31%, list=22%, signal=39%  |
| KEGG_ADHERENS_JUNCTION                                    | 68   | 0.35 | 1.37 | 0.12      | 0.292 | 0.952 | 0.952 | 0.952 | 5068        | tags=31%, list=20%, signal=39%  |
| KEGG_ALPHA_LINOLENIC_ACID_METABOLISM                      | 17   | 0.45 | 1.36 | 0.098     | 0.294 | 0.957 | 0.957 | 0.957 | 4737        | tags=41%, list=19%, signal=51%  |
| KEGG_GLYCOLYSIS_GLUONEOGENESIS                            | 60   | 0.35 | 1.35 | 0.082     | 0.302 | 0.965 | 0.965 | 0.965 | 4347        | tags=27%, list=17%, signal=32%  |
| KEGG_PPAR_SIGNALING_PATHWAY                               | 68   | 0.33 | 1.35 | 0.067     | 0.294 | 0.966 | 0.966 | 0.966 | 3458        | tags=24%, list=14%, signal=27%  |
| KEGG_WNT_SIGNALING_PATHWAY                                | 147  | 0.31 | 1.35 | 0.063     | 0.285 | 0.966 | 0.966 | 0.966 | 4842        | tags=29%, list=19%, signal=36%  |
| KEGG_T_CELL_RECEPTOR_SIGNALING_PATHWAY                    | 106  | 0.34 | 1.35 | 0.098     | 0.278 | 0.968 | 0.968 | 0.968 | 1996        | tags=19%, list=8%, signal=20%   |
| KEGG_NATURAL_KILLER_CELL_MEDIATED_CYTOTOXICITY            | 133  | 0.32 | 1.33 | 0.105     | 0.288 | 0.97  | 0.97  | 0.97  | 4464        | tags=28%, list=18%, signal=34%  |
| KEGG_VASOPRESSIN_REGULATED_WATER_REABSORPTION             | 44   | 0.34 | 1.33 | 0.099     | 0.286 | 0.971 | 0.971 | 0.971 | 6014        | tags=43%, list=24%, signal=57%  |
| KEGG_LONG_TERM_DEPRESSION                                 | 64   | 0.32 | 1.32 | 0.096     | 0.29  | 0.974 | 0.974 | 0.974 | 4795        | tags=33%, list=19%, signal=40%  |
| KEGG_GNRH_SIGNALING_PATHWAY                               | 98   | 0.31 | 1.32 | 0.099     | 0.286 | 0.976 | 0.976 | 0.976 | 6014        | tags=39%, list=24%, signal=51%  |
| KEGG_ARACHIDONIC_ACID_METABOLISM                          | 55   | 0.33 | 1.32 | 0.081     | 0.28  | 0.976 | 0.976 | 0.976 | 7341        | tags=40%, list=29%, signal=56%  |
| KEGG_ARRHYTHMOGENIC_RIGHT_VENTRICULAR_CARDIOMYOPATHY_ARVC | 74   | 0.31 | 1.32 | 0.072     | 0.275 | 0.977 | 0.977 | 0.977 | 6313        | tags=34%, list=25%, signal=45%  |
| KEGG_LYSOSOME                                             | 116  | 0.34 | 1.31 | 0.172     | 0.273 | 0.98  | 0.98  | 0.98  | 3102        | tags=22%, list=12%, signal=24%  |
| KEGG_CHEMOKINE_SIGNALING_PATHWAY                          | 181  | 0.3  | 1.31 | 0.103     | 0.268 | 0.981 | 0.981 | 0.981 | 5068        | tags=29%, list=20%, signal=36%  |
| KEGG_METABOLISM_OF_XENOBIOTICS_BY_CYTOCHROME_P450         | 70   | 0.32 | 1.3  | 0.109     | 0.279 | 0.983 | 0.983 | 0.983 | 5577        | tags=30%, list=22%, signal=38%  |
| KEGG_LEUKOCYTE_TRANSENDOTHELIAL_MIGRATION                 | 108  | 0.31 | 1.29 | 0.145     | 0.291 | 0.985 | 0.985 | 0.985 | 2122        | tags=15%, list=8%, signal=16%   |
| KEGG_ANTIGEN_PROCESSING_AND_PRESENTATION                  | 86   | 0.33 | 1.27 | 0.177     | 0.317 | 0.991 | 0.991 | 0.991 | 3332        | tags=23%, list=13%, signal=27%  |



|                                                                 |     |      |      |       |       |       |      |           |           |            |
|-----------------------------------------------------------------|-----|------|------|-------|-------|-------|------|-----------|-----------|------------|
| KEGG_PENTOSE_PHOSPHATE_PATHWAY                                  | 26  | 0.4  | 1.27 | 0.188 | 0.311 | 0.991 | 3440 | tags=31%, | list=14%, | signal=36% |
| KEGG_GLYCOSAMINOGLYCAN_BIOSYNTHESIS_HEPARAN_SULFATE             | 26  | 0.37 | 1.25 | 0.164 | 0.326 | 0.992 | 1025 | tags=15%, | list=4%,  | signal=16% |
| KEGG_NEUROACTIVE_LIGAND_RECEPTOR_INTERACTION                    | 256 | 0.27 | 1.25 | 0.091 | 0.33  | 0.993 | 4869 | tags=22%, | list=19%, | signal=27% |
| KEGG_ALDOSTERONE_REGULATED_SODIUM_REABSORPTION                  | 40  | 0.35 | 1.24 | 0.154 | 0.335 | 0.994 | 4431 | tags=35%, | list=18%, | signal=42% |
| KEGG_FC_EPSILON_RI_SIGNALING_PATHWAY                            | 76  | 0.32 | 1.24 | 0.19  | 0.332 | 0.994 | 4767 | tags=36%, | list=19%, | signal=44% |
| KEGG_GLYCOSPHINGOLIPID_BIOSYNTHESIS_GANGLIO_SERIES              | 15  | 0.41 | 1.23 | 0.189 | 0.327 | 0.994 | 2721 | tags=27%, | list=11%, | signal=30% |
| KEGG_FOCAL_ADHESION                                             | 189 | 0.27 | 1.23 | 0.136 | 0.322 | 0.994 | 4464 | tags=23%, | list=18%, | signal=27% |
| KEGG_VASCULAR_SMOOTH_MUSCLE_CONTRACTION                         | 109 | 0.28 | 1.22 | 0.139 | 0.33  | 0.995 | 4767 | tags=29%, | list=19%, | signal=36% |
| KEGG_CELL_ADHESION_MOLECULES_CAMS                               | 130 | 0.27 | 1.22 | 0.145 | 0.335 | 0.996 | 6088 | tags=33%, | list=24%, | signal=43% |
| KEGG_DILATED_CARDIOMYOPATHY                                     | 90  | 0.28 | 1.21 | 0.14  | 0.332 | 0.996 | 6572 | tags=42%, | list=26%, | signal=57% |
| KEGG_REGULATION_OF_ACTIN_CYTOSKELETON                           | 200 | 0.27 | 1.21 | 0.17  | 0.333 | 0.996 | 4767 | tags=25%, | list=19%, | signal=30% |
| KEGG_ABC_TRANSPORTERS                                           | 44  | 0.33 | 1.21 | 0.178 | 0.332 | 0.997 | 3094 | tags=18%, | list=12%, | signal=21% |
| KEGG_PROXIMAL_TUBULE_BICARBONATE_RECLAMATION                    | 23  | 0.36 | 1.2  | 0.204 | 0.343 | 0.997 | 3163 | tags=26%, | list=13%, | signal=30% |
| KEGG_INSULIN_SIGNALING_PATHWAY                                  | 133 | 0.28 | 1.2  | 0.204 | 0.338 | 0.997 | 3751 | tags=24%, | list=15%, | signal=28% |
| KEGG_RENIN_ANGIOTENSIN_SYSTEM                                   | 17  | 0.41 | 1.19 | 0.26  | 0.339 | 0.997 | 4532 | tags=35%, | list=18%, | signal=43% |
| KEGG_JAK_STAT_SIGNALING_PATHWAY                                 | 149 | 0.26 | 1.19 | 0.165 | 0.339 | 0.997 | 1993 | tags=11%, | list=8%,  | signal=12% |
| KEGG_NEUROTROPHIN_SIGNALING_PATHWAY                             | 124 | 0.29 | 1.19 | 0.233 | 0.334 | 0.997 | 3120 | tags=22%, | list=12%, | signal=25% |
| KEGG_HYPERTROPHIC_CARDIOMYOPATHY_HCM                            | 83  | 0.27 | 1.19 | 0.178 | 0.329 | 0.997 | 6572 | tags=39%, | list=26%, | signal=52% |
| KEGG_THYROID_CANCER                                             | 29  | 0.36 | 1.18 | 0.234 | 0.333 | 0.997 | 1591 | tags=21%, | list=6%,  | signal=22% |
| KEGG_CITRATE_CYCLE_TCA_CYCLE                                    | 30  | 0.35 | 1.17 | 0.265 | 0.338 | 0.997 | 1532 | tags=20%, | list=6%,  | signal=21% |
| KEGG_LYSINE_DEGRADATION                                         | 39  | 0.33 | 1.16 | 0.28  | 0.353 | 0.997 | 4011 | tags=31%, | list=16%, | signal=37% |
| KEGG_PATHWAYS_IN_CANCER                                         | 316 | 0.24 | 1.16 | 0.202 | 0.352 | 0.997 | 4464 | tags=22%, | list=18%, | signal=26% |
| KEGG_DRUG_METABOLISM_OTHER_ENZYMES                              | 48  | 0.31 | 1.15 | 0.266 | 0.354 | 0.998 | 3552 | tags=25%, | list=14%, | signal=29% |
| KEGG_PANTOTHENATE_AND_COA_BIOSYNTHESIS                          | 16  | 0.39 | 1.15 | 0.263 | 0.349 | 0.998 | 4864 | tags=38%, | list=19%, | signal=46% |
| KEGG_BASE_EXCISION_REPAIR                                       | 32  | 0.35 | 1.15 | 0.276 | 0.351 | 0.998 | 4272 | tags=31%, | list=17%, | signal=38% |
| KEGG_AMINO_SUGAR_AND_NUCLEOTIDE_SUGAR_METABOLISM                | 41  | 0.31 | 1.14 | 0.272 | 0.362 | 0.998 | 3445 | tags=24%, | list=14%, | signal=28% |
| KEGG_STEROID_HORMONE_BIOSYNTHESIS                               | 55  | 0.29 | 1.13 | 0.249 | 0.363 | 0.998 | 3971 | tags=20%, | list=16%, | signal=24% |
| KEGG_GLYCOSPHINGOLIPID_BIOSYNTHESIS_LACTO_AND_NEOLACTO_SERIES   | 25  | 0.33 | 1.09 | 0.335 | 0.423 | 0.999 | 3212 | tags=24%, | list=13%, | signal=27% |
| KEGG_GAP_JUNCTION                                               | 83  | 0.26 | 1.08 | 0.321 | 0.429 | 0.999 | 4767 | tags=27%, | list=19%, | signal=33% |
| KEGG_RETINOL_METABOLISM                                         | 62  | 0.26 | 1.07 | 0.331 | 0.437 | 0.999 | 5486 | tags=26%, | list=22%, | signal=33% |
| KEGG_EPITHELIAL_CELL_SIGNALING_IN_HELICOBACTER_PYLORI_INFECTION | 65  | 0.27 | 1.07 | 0.34  | 0.437 | 0.999 | 1288 | tags=12%, | list=5%,  | signal=13% |
| KEGG_ETHER_LIPID_METABOLISM                                     | 27  | 0.31 | 1.05 | 0.396 | 0.463 | 1     | 4737 | tags=30%, | list=19%, | signal=36% |
| KEGG_TYROSINE_METABOLISM                                        | 40  | 0.28 | 1.04 | 0.404 | 0.48  | 1     | 5254 | tags=25%, | list=21%, | signal=32% |
| KEGG_HEDGEHOG_SIGNALING_PATHWAY                                 | 56  | 0.26 | 1.04 | 0.39  | 0.475 | 1     | 4842 | tags=29%, | list=19%, | signal=35% |
| KEGG_O_GLYCAN_BIOSYNTHESIS                                      | 25  | 0.32 | 1.03 | 0.421 | 0.477 | 1     | 4353 | tags=32%, | list=17%, | signal=39% |
| KEGG_ADIPOCYTOKINE_SIGNALING_PATHWAY                            | 65  | 0.25 | 1.01 | 0.452 | 0.513 | 1     | 2320 | tags=17%, | list=9%,  | signal=19% |
| KEGG_CARDIAC_MUSCLE_CONTRACTION                                 | 69  | 0.25 | 1    | 0.447 | 0.516 | 1     | 6400 | tags=36%, | list=25%, | signal=48% |
| KEGG_CYTOSOLIC_DNA_SENSING_PATHWAY                              | 52  | 0.27 | 1    | 0.457 | 0.518 | 1     | 2388 | tags=13%, | list=10%, | signal=15% |
| KEGG_PRIMARY_BILE_ACID_BIOSYNTHESIS                             | 16  | 0.33 | 1    | 0.456 | 0.514 | 1     | 5169 | tags=38%, | list=21%, | signal=47% |
| KEGG_GLYOXYLATE_AND_DICARBOXYLATE_METABOLISM                    | 15  | 0.34 | 0.99 | 0.46  | 0.515 | 1     | 3310 | tags=27%, | list=13%, | signal=31% |
| KEGG_PRION_DISEASES                                             | 35  | 0.28 | 0.99 | 0.459 | 0.512 | 1     | 5646 | tags=31%, | list=22%, | signal=40% |
| KEGG_B_CELL_RECEPTOR_SIGNALING_PATHWAY                          | 73  | 0.27 | 0.99 | 0.447 | 0.516 | 1     | 2018 | tags=16%, | list=8%,  | signal=18% |
| KEGG_PORPHYRIN_AND_CHLOROPHYLL_METABOLISM                       | 39  | 0.28 | 0.98 | 0.466 | 0.517 | 1     | 5486 | tags=31%, | list=22%, | signal=39% |
| KEGG_PHENYLALANINE_METABOLISM                                   | 17  | 0.32 | 0.98 | 0.476 | 0.515 | 1     | 5245 | tags=29%, | list=21%, | signal=37% |
| KEGG_HUNTINGTONS_DISEASE                                        | 149 | 0.22 | 0.95 | 0.504 | 0.561 | 1     | 2946 | tags=16%, | list=12%, | signal=18% |
| KEGG_ENDOMETRIAL_CANCER                                         | 52  | 0.27 | 0.93 | 0.528 | 0.591 | 1     | 3037 | tags=19%, | list=12%, | signal=22% |
| KEGG_GLYCINE_SERINE_AND_THREONINE_METABOLISM                    | 31  | 0.26 | 0.91 | 0.593 | 0.615 | 1     | 5465 | tags=26%, | list=22%, | signal=33% |

|                                                |     |       |       |       |       |       |                                     |
|------------------------------------------------|-----|-------|-------|-------|-------|-------|-------------------------------------|
| KEGG_NON_SMALL_CELL_LUNG_CANCER                | 53  | 0.26  | 0.91  | 0.565 | 0.615 | 1     | 4805 tags=28%, list=19%, signal=35% |
| KEGG_OLFACTORY_TRANSDUCTION                    | 379 | 0.19  | 0.88  | 0.732 | 0.655 | 1     | 8685 tags=35%, list=35%, signal=52% |
| KEGG_BLADDER_CANCER                            | 39  | 0.24  | 0.83  | 0.716 | 0.74  | 1     | 4805 tags=23%, list=19%, signal=28% |
| KEGG_SPHINGOLIPID_METABOLISM                   | 31  | 0.23  | 0.82  | 0.734 | 0.758 | 1     | 4982 tags=26%, list=20%, signal=32% |
| KEGG_AMINOACYL_TRNA_BIOSYNTHESIS               | 22  | 0.27  | 0.82  | 0.676 | 0.751 | 1     | 5682 tags=36%, list=23%, signal=47% |
| KEGG_SYSTEMIC_LUPUS_ERYTHEMATOSUS              | 56  | 0.21  | 0.8   | 0.769 | 0.762 | 1     | 1361 tags=7%, list=5%, signal=8%    |
| KEGG_MATURITY_ONSET_DIABETES_OF_THE_YOUNG      | 20  | 0.24  | 0.75  | 0.83  | 0.845 | 1     | 3284 tags=15%, list=13%, signal=17% |
| KEGG_COMPLEMENT_AND_COAGULATION_CASCADES       | 68  | 0.17  | 0.66  | 0.953 | 0.93  | 1     | 2941 tags=10%, list=12%, signal=12% |
| KEGG_UBIQUITIN_MEDIATED_PROTEOLYSIS            | 126 | -0.43 | -1.86 | 0.002 | 0.14  | 0.13  | 3802 tags=34%, list=15%, signal=40% |
| KEGG_PROTEIN_EXPORT                            | 21  | -0.66 | -1.75 | 0.028 | 0.218 | 0.302 | 2393 tags=43%, list=10%, signal=47% |
| KEGG_P53_SIGNALING_PATHWAY                     | 64  | -0.44 | -1.67 | 0.009 | 0.297 | 0.485 | 4006 tags=36%, list=16%, signal=43% |
| KEGG_RNA_DEGRADATION                           | 51  | -0.45 | -1.62 | 0.03  | 0.331 | 0.61  | 1913 tags=33%, list=8%, signal=36%  |
| KEGG_VALINE_LEUCINE_AND_ISOLEUCINE_DEGRADATION | 43  | -0.47 | -1.62 | 0.031 | 0.272 | 0.619 | 4018 tags=37%, list=16%, signal=44% |
| KEGG_BASAL_TRANSCRIPTION_FACTORS               | 35  | -0.46 | -1.59 | 0.02  | 0.285 | 0.682 | 3572 tags=43%, list=14%, signal=50% |
| KEGG_SNARE_INTERACTIONS_IN_VESICULAR_TRANSPORT | 37  | -0.41 | -1.53 | 0.025 | 0.361 | 0.784 | 4675 tags=41%, list=19%, signal=50% |
| KEGG_OOCYTE_MEIOSIS                            | 108 | -0.36 | -1.53 | 0.023 | 0.323 | 0.786 | 2526 tags=24%, list=10%, signal=27% |
| KEGG_REGULATION_OF_AUTOPHAGY                   | 34  | -0.44 | -1.5  | 0.041 | 0.345 | 0.834 | 3366 tags=29%, list=13%, signal=34% |
| KEGG_N_GLYCAN_BIOSYNTHESIS                     | 44  | -0.41 | -1.49 | 0.06  | 0.32  | 0.842 | 4966 tags=36%, list=20%, signal=45% |
| KEGG_RIBOSOME                                  | 85  | -0.57 | -1.48 | 0.181 | 0.32  | 0.866 | 4573 tags=61%, list=18%, signal=75% |
| KEGG_SMALL_CELL_LUNG_CANCER                    | 82  | -0.35 | -1.4  | 0.069 | 0.449 | 0.942 | 3451 tags=27%, list=14%, signal=31% |
| KEGG_PROTEASOME                                | 42  | -0.48 | -1.4  | 0.168 | 0.423 | 0.946 | 5593 tags=50%, list=22%, signal=64% |
| KEGG_CELL_CYCLE                                | 114 | -0.36 | -1.39 | 0.083 | 0.426 | 0.953 | 5795 tags=39%, list=23%, signal=50% |
| KEGG_PARKINSONS_DISEASE                        | 90  | -0.38 | -1.38 | 0.148 | 0.411 | 0.954 | 4644 tags=37%, list=18%, signal=45% |
| KEGG_MISMATCH_REPAIR                           | 22  | -0.47 | -1.37 | 0.122 | 0.415 | 0.962 | 4296 tags=55%, list=17%, signal=66% |
| KEGG_FATTY_ACID_METABOLISM                     | 40  | -0.35 | -1.35 | 0.081 | 0.434 | 0.972 | 3455 tags=33%, list=14%, signal=38% |
| KEGG_MTOR_SIGNALING_PATHWAY                    | 47  | -0.35 | -1.33 | 0.125 | 0.441 | 0.975 | 3215 tags=30%, list=13%, signal=34% |
| KEGG_NUCLEOTIDE_EXCISION_REPAIR                | 43  | -0.4  | -1.33 | 0.134 | 0.418 | 0.975 | 4296 tags=42%, list=17%, signal=50% |
| KEGG_PATHOGENIC_ESCHERICHIA_COLI_INFECTION     | 52  | -0.35 | -1.33 | 0.11  | 0.401 | 0.976 | 1691 tags=19%, list=7%, signal=21%  |
| KEGG_PROPANOATE_METABOLISM                     | 31  | -0.43 | -1.33 | 0.158 | 0.382 | 0.976 | 4450 tags=42%, list=18%, signal=51% |
| KEGG_PROSTATE_CANCER                           | 88  | -0.34 | -1.3  | 0.17  | 0.432 | 0.985 | 4963 tags=35%, list=20%, signal=44% |
| KEGG_SPLICEOSOME                               | 103 | -0.31 | -1.28 | 0.171 | 0.448 | 0.986 | 3459 tags=29%, list=14%, signal=34% |
| KEGG_BIOSYNTHESIS_OF_UNSATURATED_FATTY_ACIDS   | 19  | -0.43 | -1.26 | 0.19  | 0.476 | 0.992 | 5783 tags=47%, list=23%, signal=61% |
| KEGG_PROGESTERONE_MEDIATED_OOCYTE_MATURATION   | 84  | -0.3  | -1.25 | 0.16  | 0.478 | 0.994 | 3215 tags=26%, list=13%, signal=30% |
| KEGG_PANCREATIC_CANCER                         | 69  | -0.33 | -1.24 | 0.199 | 0.473 | 0.995 | 5171 tags=38%, list=21%, signal=47% |
| KEGG_ALZHEIMERS_DISEASE                        | 137 | -0.29 | -1.22 | 0.194 | 0.496 | 0.997 | 3267 tags=24%, list=13%, signal=28% |
| KEGG_LONG_TERM_POTENTIATION                    | 68  | -0.3  | -1.22 | 0.163 | 0.488 | 0.997 | 5912 tags=37%, list=24%, signal=48% |
| KEGG_PEROXISOME                                | 73  | -0.29 | -1.19 | 0.205 | 0.529 | 0.998 | 3933 tags=27%, list=16%, signal=32% |
| KEGG_ASTHMA                                    | 30  | -0.39 | -1.19 | 0.26  | 0.52  | 0.999 | 8211 tags=67%, list=33%, signal=99% |
| KEGG_PYRUVATE_METABOLISM                       | 39  | -0.35 | -1.19 | 0.28  | 0.504 | 0.999 | 3455 tags=33%, list=14%, signal=39% |
| KEGG_CYSTEINE_AND_METHIONINE_METABOLISM        | 34  | -0.34 | -1.16 | 0.267 | 0.555 | 0.999 | 544 tags=15%, list=2%, signal=15%   |
| KEGG_RENAL_CELL_CARCINOMA                      | 66  | -0.31 | -1.15 | 0.283 | 0.541 | 0.999 | 6080 tags=41%, list=24%, signal=54% |
| KEGG_NICOTINATE_AND_NICOTINAMIDE_METABOLISM    | 21  | -0.38 | -1.15 | 0.29  | 0.533 | 0.999 | 5516 tags=33%, list=22%, signal=43% |
| KEGG_RIG_I_LIKE_RECEPTOR_SIGNALING_PATHWAY     | 64  | -0.3  | -1.15 | 0.266 | 0.519 | 0.999 | 3152 tags=23%, list=13%, signal=27% |
| KEGG_APOPTOSIS                                 | 84  | -0.27 | -1.14 | 0.251 | 0.53  | 0.999 | 5092 tags=33%, list=20%, signal=42% |
| KEGG_LEISHMANIA_INFECTION                      | 68  | -0.31 | -1.13 | 0.284 | 0.529 | 0.999 | 2946 tags=25%, list=12%, signal=28% |
| KEGG_TRYPTOPHAN_METABOLISM                     | 36  | -0.31 | -1.12 | 0.311 | 0.544 | 0.999 | 3455 tags=25%, list=14%, signal=29% |
| KEGG_NITROGEN_METABOLISM                       | 23  | -0.35 | -1.11 | 0.333 | 0.547 | 0.999 | 9061 tags=52%, list=36%, signal=82% |

|                                                           |     |       |       |       |       |       |                                     |
|-----------------------------------------------------------|-----|-------|-------|-------|-------|-------|-------------------------------------|
| KEGG_TOLL_LIKE_RECEPTOR_SIGNALING_PATHWAY                 | 99  | -0.28 | -1.1  | 0.318 | 0.545 | 0.999 | 3177 tags=24%, list=13%, signal=28% |
| KEGG_BETA_ALANINE_METABOLISM                              | 22  | -0.35 | -1.1  | 0.331 | 0.532 | 0.999 | 3933 tags=36%, list=16%, signal=43% |
| KEGG_COLORECTAL_CANCER                                    | 62  | -0.29 | -1.1  | 0.3   | 0.522 | 0.999 | 5917 tags=40%, list=24%, signal=53% |
| KEGG_BUTANOATE_METABOLISM                                 | 34  | -0.32 | -1.1  | 0.343 | 0.524 | 0.999 | 3455 tags=29%, list=14%, signal=34% |
| KEGG_HISTIDINE_METABOLISM                                 | 27  | -0.33 | -1.09 | 0.335 | 0.519 | 0.999 | 4133 tags=37%, list=16%, signal=44% |
| KEGG_INTESTINAL_IMMUNE_NETWORK_FOR_IGA_PRODUCTION         | 48  | -0.31 | -1.08 | 0.34  | 0.528 | 0.999 | 3171 tags=27%, list=13%, signal=31% |
| KEGG_OXIDATIVE_PHOSPHORYLATION                            | 94  | -0.3  | -1.07 | 0.364 | 0.541 | 0.999 | 4605 tags=32%, list=18%, signal=39% |
| KEGG_TGF_BETA_SIGNALING_PATHWAY                           | 84  | -0.25 | -1.05 | 0.366 | 0.563 | 1     | 5939 tags=40%, list=24%, signal=53% |
| KEGG_ONE_CARBON_POOL_BY_FOLATE                            | 17  | -0.36 | -1.05 | 0.409 | 0.563 | 1     | 4829 tags=41%, list=19%, signal=51% |
| KEGG_GLYCOSYLPHOSPHATIDYLINOSITOL_GPI_ANCHOR_BIOSYNTHESIS | 25  | -0.32 | -1.04 | 0.405 | 0.553 | 1     | 5060 tags=36%, list=20%, signal=45% |
| KEGG_NOD_LIKE_RECEPTOR_SIGNALING_PATHWAY                  | 55  | -0.29 | -1.04 | 0.384 | 0.547 | 1     | 2946 tags=24%, list=12%, signal=27% |
| KEGG_GLIOMA                                               | 63  | -0.28 | -1.04 | 0.4   | 0.547 | 1     | 5912 tags=38%, list=24%, signal=50% |
| KEGG_ARGININE_AND_PROLINE_METABOLISM                      | 50  | -0.26 | -1.03 | 0.429 | 0.558 | 1     | 4806 tags=32%, list=19%, signal=39% |
| KEGG_AMYOTROPHIC_LATERAL_SCLEROSIS_ALS                    | 52  | -0.25 | -1.03 | 0.395 | 0.549 | 1     | 4487 tags=27%, list=18%, signal=33% |
| KEGG_CHRONIC_MYELOID_LEUKEMIA                             | 72  | -0.28 | -1.01 | 0.425 | 0.566 | 1     | 5171 tags=38%, list=21%, signal=47% |
| KEGG_DNA_REPLICATION                                      | 35  | -0.31 | -0.98 | 0.47  | 0.609 | 1     | 4296 tags=40%, list=17%, signal=48% |
| KEGG_TERPENOID_BACKBONE_BIOSYNTHESIS                      | 15  | -0.36 | -0.98 | 0.478 | 0.603 | 1     | 2336 tags=33%, list=9%, signal=37%  |
| KEGG_ERBB_SIGNALING_PATHWAY                               | 84  | -0.25 | -0.98 | 0.479 | 0.597 | 1     | 3215 tags=23%, list=13%, signal=26% |
| KEGG_PURINE_METABOLISM                                    | 142 | -0.22 | -0.97 | 0.485 | 0.6   | 1     | 4880 tags=24%, list=19%, signal=30% |
| KEGG_PYRIMIDINE_METABOLISM                                | 90  | -0.23 | -0.96 | 0.49  | 0.609 | 1     | 4862 tags=31%, list=19%, signal=38% |
| KEGG_SELENOAMINO_ACID_METABOLISM                          | 24  | -0.28 | -0.9  | 0.581 | 0.724 | 1     | 1647 tags=17%, list=7%, signal=18%  |
| KEGG_MELANOMA                                             | 71  | -0.22 | -0.88 | 0.639 | 0.759 | 1     | 5171 tags=24%, list=21%, signal=30% |
| KEGG_VIRAL_MYOCARDITIS                                    | 70  | -0.23 | -0.87 | 0.637 | 0.756 | 1     | 3171 tags=19%, list=13%, signal=21% |
| KEGG_DORSO_VENTRAL_AXIS_FORMATION                         | 24  | -0.27 | -0.83 | 0.684 | 0.834 | 1     | 7035 tags=54%, list=28%, signal=75% |
| KEGG_ALLOGRAFT_REJECTION                                  | 37  | -0.25 | -0.82 | 0.681 | 0.841 | 1     | 7000 tags=46%, list=28%, signal=64% |
| KEGG_ECM_RECEPTOR_INTERACTION                             | 82  | -0.2  | -0.82 | 0.77  | 0.828 | 1     | 2202 tags=10%, list=9%, signal=11%  |
| KEGG_GRAFT_VERSUS_HOST_DISEASE                            | 40  | -0.25 | -0.81 | 0.707 | 0.834 | 1     | 3171 tags=23%, list=13%, signal=26% |
| KEGG_TYPE_I_DIABETES_MELLITUS                             | 43  | -0.23 | -0.79 | 0.743 | 0.848 | 1     | 3171 tags=19%, list=13%, signal=21% |
| KEGG_TYPE_II_DIABETES_MELLITUS                            | 44  | -0.23 | -0.79 | 0.787 | 0.838 | 1     | 2761 tags=18%, list=11%, signal=20% |
| KEGG_VIBRIO_CHOLERAE_INFECTION                            | 52  | -0.2  | -0.75 | 0.846 | 0.886 | 1     | 4719 tags=25%, list=19%, signal=31% |
| KEGG_RNA_POLYMERASE                                       | 26  | -0.25 | -0.75 | 0.771 | 0.874 | 1     | 7554 tags=54%, list=30%, signal=77% |
| KEGG_AUTOIMMUNE_THYROID_DISEASE                           | 52  | -0.2  | -0.72 | 0.884 | 0.903 | 1     | 8066 tags=40%, list=32%, signal=59% |
| KEGG_ALANINE_ASPARTATE_AND_GLUTAMATE_METABOLISM           | 30  | -0.21 | -0.7  | 0.869 | 0.911 | 1     | 1962 tags=13%, list=8%, signal=14%  |
| KEGG_ASCORBATE_AND_ALDARATE_METABOLISM                    | 25  | -0.21 | -0.68 | 0.901 | 0.922 | 1     | 5062 tags=28%, list=20%, signal=35% |
| KEGG_PENTOSE_AND_GLUCURONATE_INTERCONVERSIONS             | 27  | -0.19 | -0.65 | 0.942 | 0.932 | 1     | 1693 tags=11%, list=7%, signal=12%  |

# GSEA-MS4A6A

| GS follow link to MSigDB                                  | SIZE | ES   | NES  | NOM p-val | FDR q-val | FWER p-val | RANK AT MAX | LEADING EDGE                   |
|-----------------------------------------------------------|------|------|------|-----------|-----------|------------|-------------|--------------------------------|
| KEGG_PARKINSONS_DISEASE                                   | 90   | 0.66 | 2.36 | 0         | 0         | 0          | 2346        | tags=36%, list=9%, signal=39%  |
| KEGG_OXIDATIVE_PHOSPHORYLATION                            | 94   | 0.66 | 2.3  | 0         | 0         | 0          | 950         | tags=31%, list=4%, signal=32%  |
| KEGG_ALZHEIMERS_DISEASE                                   | 137  | 0.52 | 2.22 | 0         | 0         | 0          | 3897        | tags=36%, list=16%, signal=42% |
| KEGG_RIBOSOME                                             | 85   | 0.84 | 2.15 | 0         | 0         | 0.002      | 1117        | tags=59%, list=4%, signal=61%  |
| KEGG_HUNTINGTONS_DISEASE                                  | 149  | 0.48 | 2.1  | 0         | 0.001     | 0.006      | 2654        | tags=28%, list=11%, signal=31% |
| KEGG_PROTEASOME                                           | 42   | 0.72 | 2.06 | 0         | 0.002     | 0.012      | 2735        | tags=45%, list=11%, signal=51% |
| KEGG_CARDIAC_MUSCLE_CONTRACTION                           | 69   | 0.48 | 1.93 | 0         | 0.007     | 0.055      | 3875        | tags=29%, list=15%, signal=34% |
| KEGG_PROTEIN_EXPORT                                       | 21   | 0.73 | 1.89 | 0         | 0.011     | 0.083      | 2823        | tags=52%, list=11%, signal=59% |
| KEGG_TRYPTOPHAN_METABOLISM                                | 36   | 0.51 | 1.88 | 0         | 0.011     | 0.094      | 2433        | tags=22%, list=10%, signal=25% |
| KEGG_BASAL_TRANSCRIPTION_FACTORS                          | 35   | 0.53 | 1.79 | 0.002     | 0.026     | 0.206      | 3386        | tags=34%, list=13%, signal=40% |
| KEGG_SNARE_INTERACTIONS_IN_VESICULAR_TRANSPORT            | 37   | 0.48 | 1.78 | 0.004     | 0.026     | 0.222      | 2367        | tags=30%, list=9%, signal=33%  |
| KEGG_SPLICEOSOME                                          | 103  | 0.43 | 1.76 | 0.011     | 0.03      | 0.261      | 1158        | tags=26%, list=5%, signal=27%  |
| KEGG_REGULATION_OF_AUTOPHAGY                              | 34   | 0.5  | 1.72 | 0.006     | 0.039     | 0.34       | 5215        | tags=47%, list=21%, signal=59% |
| KEGG_PROPANOATE_METABOLISM                                | 31   | 0.55 | 1.71 | 0.019     | 0.04      | 0.362      | 2716        | tags=35%, list=11%, signal=40% |
| KEGG_PEROXISOME                                           | 73   | 0.41 | 1.7  | 0.006     | 0.042     | 0.401      | 2594        | tags=26%, list=10%, signal=29% |
| KEGG_TERPENOID_BACKBONE_BIOSYNTHESIS                      | 15   | 0.61 | 1.67 | 0.02      | 0.049     | 0.461      | 2529        | tags=40%, list=10%, signal=44% |
| KEGG_NUCLEOTIDE_EXCISION_REPAIR                           | 43   | 0.49 | 1.67 | 0.02      | 0.046     | 0.461      | 2418        | tags=28%, list=10%, signal=31% |
| KEGG_PYRUVATE_METABOLISM                                  | 39   | 0.47 | 1.58 | 0.047     | 0.088     | 0.672      | 3062        | tags=31%, list=12%, signal=35% |
| KEGG_GLUTATHIONE_METABOLISM                               | 49   | 0.42 | 1.53 | 0.037     | 0.113     | 0.769      | 2279        | tags=22%, list=9%, signal=25%  |
| KEGG_UBIQUITIN_MEDIATED_PROTEOLYSIS                       | 126  | 0.34 | 1.49 | 0.03      | 0.146     | 0.838      | 1896        | tags=20%, list=8%, signal=21%  |
| KEGG_N_GLYCAN_BIOSYNTHESIS                                | 44   | 0.41 | 1.48 | 0.052     | 0.144     | 0.845      | 2353        | tags=25%, list=9%, signal=28%  |
| KEGG_CITRATE_CYCLE_TCA_CYCLE                              | 30   | 0.46 | 1.48 | 0.086     | 0.143     | 0.853      | 2204        | tags=27%, list=9%, signal=29%  |
| KEGG_METABOLISM_OF_XENOBIOTICS_BY_CYTOCHROME_P450         | 70   | 0.37 | 1.46 | 0.033     | 0.148     | 0.869      | 5643        | tags=29%, list=22%, signal=37% |
| KEGG_MISMATCH_REPAIR                                      | 22   | 0.49 | 1.42 | 0.088     | 0.185     | 0.917      | 2770        | tags=32%, list=11%, signal=36% |
| KEGG_SYSTEMIC_LUPUS_ERYTHEMATOSUS                         | 56   | 0.38 | 1.41 | 0.076     | 0.183     | 0.92       | 4320        | tags=30%, list=17%, signal=37% |
| KEGG_PYRIMIDINE_METABOLISM                                | 90   | 0.35 | 1.41 | 0.061     | 0.178     | 0.922      | 3569        | tags=24%, list=14%, signal=28% |
| KEGG_GLYOXYLATE_AND_DICARBOXYLATE_METABOLISM              | 15   | 0.5  | 1.4  | 0.098     | 0.181     | 0.925      | 1208        | tags=20%, list=5%, signal=21%  |
| KEGG_DRUG_METABOLISM_CYTOCHROME_P450                      | 72   | 0.34 | 1.4  | 0.055     | 0.177     | 0.931      | 6332        | tags=31%, list=25%, signal=41% |
| KEGG_RNA_DEGRADATION                                      | 51   | 0.4  | 1.39 | 0.113     | 0.176     | 0.935      | 5061        | tags=47%, list=20%, signal=59% |
| KEGG_FATTY_ACID_METABOLISM                                | 40   | 0.37 | 1.38 | 0.071     | 0.181     | 0.944      | 1791        | tags=15%, list=7%, signal=16%  |
| KEGG_INTESTINAL_IMMUNE_NETWORK_FOR_IGA_PRODUCTION         | 48   | 0.4  | 1.37 | 0.105     | 0.189     | 0.953      | 2738        | tags=27%, list=11%, signal=30% |
| KEGG_TYPE_I_DIABETES_MELLITUS                             | 43   | 0.38 | 1.34 | 0.139     | 0.219     | 0.966      | 2738        | tags=23%, list=11%, signal=26% |
| KEGG_VALINE_LEUCINE_AND_ISOLEUCINE_DEGRADATION            | 43   | 0.4  | 1.32 | 0.146     | 0.226     | 0.973      | 4188        | tags=28%, list=17%, signal=33% |
| KEGG_HISTIDINE_METABOLISM                                 | 27   | 0.39 | 1.32 | 0.109     | 0.222     | 0.973      | 1987        | tags=19%, list=8%, signal=20%  |
| KEGG_GRAFT_VERSUS_HOST_DISEASE                            | 40   | 0.4  | 1.31 | 0.16      | 0.226     | 0.976      | 2738        | tags=25%, list=11%, signal=28% |
| KEGG_GLYCOSYLPHOSPHATIDYLINOSITOL_GPI_ANCHOR_BIOSYNTHESIS | 25   | 0.38 | 1.28 | 0.164     | 0.257     | 0.981      | 1516        | tags=20%, list=6%, signal=21%  |
| KEGG_ASTHMA                                               | 30   | 0.42 | 1.28 | 0.191     | 0.25      | 0.981      | 3985        | tags=33%, list=16%, signal=40% |
| KEGG_O_GLYCAN_BIOSYNTHESIS                                | 25   | 0.38 | 1.25 | 0.166     | 0.281     | 0.988      | 1999        | tags=20%, list=8%, signal=22%  |
| KEGG_DNA_REPLICATION                                      | 35   | 0.39 | 1.23 | 0.209     | 0.303     | 0.992      | 2418        | tags=23%, list=10%, signal=25% |
| KEGG_AUTOIMMUNE_THYROID_DISEASE                           | 52   | 0.34 | 1.22 | 0.211     | 0.313     | 0.994      | 5343        | tags=38%, list=21%, signal=49% |
| KEGG_ALLOGRAFT_REJECTION                                  | 37   | 0.37 | 1.2  | 0.264     | 0.332     | 0.996      | 2738        | tags=24%, list=11%, signal=27% |
| KEGG_HOMOLOGOUS_RECOMBINATION                             | 23   | 0.4  | 1.19 | 0.253     | 0.331     | 0.996      | 988         | tags=22%, list=4%, signal=23%  |
| KEGG_BUTANOATE_METABOLISM                                 | 34   | 0.35 | 1.18 | 0.24      | 0.335     | 0.996      | 2529        | tags=18%, list=10%, signal=20% |
| KEGG_PORPHYRIN_AND_CHLOROPHYLL_METABOLISM                 | 39   | 0.34 | 1.14 | 0.275     | 0.388     | 0.997      | 6763        | tags=41%, list=27%, signal=56% |
| KEGG_PENTOSE_AND_GLCURONATE_INTERCONVERSIONS              | 27   | 0.33 | 1.11 | 0.311     | 0.434     | 0.998      | 5643        | tags=37%, list=22%, signal=48% |
| KEGG_PURINE_METABOLISM                                    | 142  | 0.25 | 1.09 | 0.303     | 0.452     | 0.999      | 3569        | tags=19%, list=14%, signal=22% |

|                                                  |     |       |       |       |       |       |                                     |
|--------------------------------------------------|-----|-------|-------|-------|-------|-------|-------------------------------------|
| KEGG_BETA_ALANINE_METABOLISM                     | 22  | 0.34  | 1.07  | 0.363 | 0.49  | 1     | 1791 tags=14%, list=7%, signal=15%  |
| KEGG_GLYCOLYSIS_GLUconeogenesis                  | 60  | 0.27  | 1.06  | 0.378 | 0.495 | 1     | 2985 tags=22%, list=12%, signal=25% |
| KEGG_STEROID_HORMONE_BIOSYNTHESIS                | 55  | 0.27  | 1.06  | 0.366 | 0.489 | 1     | 5643 tags=35%, list=22%, signal=44% |
| KEGG_OOCYTE_MEIOSIS                              | 108 | 0.25  | 1.04  | 0.392 | 0.512 | 1     | 3174 tags=19%, list=13%, signal=22% |
| KEGG_P53_SIGNALING_PATHWAY                       | 64  | 0.28  | 1.04  | 0.382 | 0.505 | 1     | 4855 tags=34%, list=19%, signal=42% |
| KEGG_CYSTEINE_AND_METHIONINE_METABOLISM          | 34  | 0.3   | 1.03  | 0.42  | 0.5   | 1     | 3240 tags=26%, list=13%, signal=30% |
| KEGG_ANTIGEN_PROCESSING_AND_PRESENTATION         | 86  | 0.27  | 1.02  | 0.44  | 0.52  | 1     | 3057 tags=22%, list=12%, signal=25% |
| KEGG_PROXIMAL_TUBULE_BICARBONATE_RECLAMATION     | 23  | 0.3   | 0.99  | 0.47  | 0.561 | 1     | 1029 tags=9%, list=4%, signal=9%    |
| KEGG_CYTOSOLIC_DNA_SENSING_PATHWAY               | 52  | 0.27  | 0.97  | 0.495 | 0.583 | 1     | 3816 tags=25%, list=15%, signal=29% |
| KEGG_RNA_POLYMERASE                              | 26  | 0.31  | 0.96  | 0.502 | 0.584 | 1     | 3567 tags=31%, list=14%, signal=36% |
| KEGG_NOD_LIKE_RECEPTOR_SIGNALING_PATHWAY         | 55  | 0.27  | 0.96  | 0.474 | 0.574 | 1     | 3844 tags=25%, list=15%, signal=30% |
| KEGG_ASCORBATE_AND_ALDARATE_METABOLISM           | 25  | 0.29  | 0.96  | 0.52  | 0.573 | 1     | 5643 tags=36%, list=22%, signal=46% |
| KEGG_ONE_CARBON_POOL_BY_FOLATE                   | 17  | 0.33  | 0.95  | 0.495 | 0.58  | 1     | 1042 tags=12%, list=4%, signal=12%  |
| KEGG_AMINO_SUGAR_AND_NUCLEOTIDE_SUGAR_METABOLISM | 41  | 0.26  | 0.93  | 0.57  | 0.614 | 1     | 3708 tags=24%, list=15%, signal=29% |
| KEGG_PRIMARY_BILE_ACID_BIOSYNTHESIS              | 16  | 0.31  | 0.92  | 0.55  | 0.609 | 1     | 3802 tags=31%, list=15%, signal=37% |
| KEGG_PPAR_SIGNALING_PATHWAY                      | 68  | 0.23  | 0.92  | 0.586 | 0.606 | 1     | 3228 tags=16%, list=13%, signal=19% |
| KEGG_ECM_RECEPTOR_INTERACTION                    | 82  | 0.22  | 0.9   | 0.621 | 0.626 | 1     | 5321 tags=22%, list=11%, signal=28% |
| KEGG_DRUG_METABOLISM_OTHER_ENZYMES               | 48  | 0.23  | 0.87  | 0.681 | 0.668 | 1     | 1104 tags=8%, list=4%, signal=9%    |
| KEGG_BIOSYNTHESIS_OF_UNSATURATED_FATTY_ACIDS     | 19  | 0.29  | 0.83  | 0.703 | 0.73  | 1     | 5441 tags=37%, list=22%, signal=47% |
| KEGG_COMPLEMENT_AND_COAGULATION_CASCADES         | 68  | 0.17  | 0.67  | 0.953 | 0.949 | 1     | 5544 tags=24%, list=22%, signal=30% |
| KEGG_NEUROACTIVE_LIGAND_RECEPTOR_INTERACTION     | 256 | 0.13  | 0.63  | 1     | 0.963 | 1     | 5935 tags=21%, list=24%, signal=28% |
| KEGG_OLFACTORY_TRANSDUCTION                      | 379 | 0.1   | 0.47  | 1     | 0.996 | 1     | 5447 tags=17%, list=22%, signal=21% |
| KEGG_T_CELL_RECEPTOR_SIGNALING_PATHWAY           | 106 | -0.53 | -2.09 | 0     | 0.007 | 0.007 | 3213 tags=39%, list=13%, signal=44% |
| KEGG_CHRONIC_MYELOID_LEUKEMIA                    | 72  | -0.56 | -2.05 | 0     | 0.008 | 0.014 | 3510 tags=39%, list=14%, signal=45% |
| KEGG_B_CELL_RECEPTOR_SIGNALING_PATHWAY           | 73  | -0.57 | -2.04 | 0     | 0.005 | 0.015 | 3380 tags=42%, list=13%, signal=49% |
| KEGG_VEGF_SIGNALING_PATHWAY                      | 72  | -0.5  | -2.03 | 0     | 0.005 | 0.017 | 2914 tags=33%, list=12%, signal=38% |
| KEGG_ADHERENS_JUNCTION                           | 68  | -0.52 | -2    | 0     | 0.006 | 0.024 | 6219 tags=53%, list=25%, signal=70% |
| KEGG_ACUTE_MYELOID_LEUKEMIA                      | 56  | -0.56 | -2    | 0     | 0.005 | 0.024 | 2637 tags=38%, list=10%, signal=42% |
| KEGG_NOTCH_SIGNALING_PATHWAY                     | 44  | -0.58 | -1.99 | 0.002 | 0.006 | 0.031 | 3393 tags=41%, list=13%, signal=47% |
| KEGG_BLADDER_CANCER                              | 39  | -0.58 | -1.98 | 0     | 0.005 | 0.033 | 3213 tags=36%, list=13%, signal=41% |
| KEGG_COLORECTAL_CANCER                           | 62  | -0.52 | -1.96 | 0.002 | 0.006 | 0.041 | 4919 tags=45%, list=20%, signal=56% |
| KEGG_NEUROTROPHIN_SIGNALING_PATHWAY              | 124 | -0.48 | -1.94 | 0.002 | 0.007 | 0.05  | 3561 tags=35%, list=14%, signal=40% |
| KEGG_LEUKOCYTE_TRANSENDOTHELIAL_MIGRATION        | 108 | -0.47 | -1.93 | 0     | 0.007 | 0.055 | 4813 tags=39%, list=19%, signal=48% |
| KEGG_NON_SMALL_CELL_LUNG_CANCER                  | 53  | -0.56 | -1.91 | 0.006 | 0.009 | 0.066 | 4761 tags=45%, list=19%, signal=56% |
| KEGG_FC_EPSILON_RI_SIGNALING_PATHWAY             | 76  | -0.49 | -1.9  | 0.004 | 0.008 | 0.067 | 2956 tags=32%, list=12%, signal=36% |
| KEGG_PATHWAYS_IN_CANCER                          | 316 | -0.4  | -1.89 | 0     | 0.009 | 0.084 | 3546 tags=28%, list=14%, signal=32% |
| KEGG_INOSITOL_PHOSPHATE_METABOLISM               | 49  | -0.52 | -1.88 | 0     | 0.01  | 0.092 | 2598 tags=37%, list=10%, signal=41% |
| KEGG_ALDOSTERONE_REGULATED_SODIUM_REABSORPTION   | 40  | -0.53 | -1.87 | 0.002 | 0.01  | 0.1   | 6266 tags=45%, list=25%, signal=60% |
| KEGG_MAPK_SIGNALING_PATHWAY                      | 256 | -0.4  | -1.87 | 0     | 0.009 | 0.1   | 3191 tags=25%, list=13%, signal=29% |
| KEGG_PHOSPHATIDYLINOSITOL_SIGNALING_SYSTEM       | 70  | -0.5  | -1.86 | 0.002 | 0.009 | 0.104 | 2787 tags=36%, list=11%, signal=40% |
| KEGG_GAP_JUNCTION                                | 83  | -0.45 | -1.82 | 0.004 | 0.013 | 0.145 | 3178 tags=27%, list=13%, signal=30% |
| KEGG_MELANOGENESIS                               | 100 | -0.43 | -1.81 | 0     | 0.015 | 0.172 | 3301 tags=26%, list=13%, signal=30% |
| KEGG_GNRH_SIGNALING_PATHWAY                      | 98  | -0.43 | -1.81 | 0     | 0.015 | 0.175 | 3178 tags=28%, list=13%, signal=31% |
| KEGG_CHEMOKINE_SIGNALING_PATHWAY                 | 181 | -0.41 | -1.8  | 0     | 0.015 | 0.179 | 3265 tags=29%, list=13%, signal=33% |
| KEGG_PANCREATIC_CANCER                           | 69  | -0.48 | -1.79 | 0.002 | 0.016 | 0.193 | 3546 tags=38%, list=14%, signal=44% |
| KEGG_TIGHT_JUNCTION                              | 122 | -0.4  | -1.79 | 0     | 0.015 | 0.196 | 4716 tags=30%, list=19%, signal=37% |
| KEGG_WNT_SIGNALING_PATHWAY                       | 147 | -0.4  | -1.77 | 0.002 | 0.017 | 0.22  | 4593 tags=31%, list=18%, signal=37% |

|                                                                 |     |       |       |       |       |       |                                     |
|-----------------------------------------------------------------|-----|-------|-------|-------|-------|-------|-------------------------------------|
| KEGG_ERBB_SIGNALING_PATHWAY                                     | 84  | -0.45 | -1.77 | 0.006 | 0.017 | 0.222 | 3337 tags=29%, list=13%, signal=33% |
| KEGG_LONG_TERM_DEPRESSION                                       | 64  | -0.43 | -1.76 | 0.002 | 0.018 | 0.234 | 2487 tags=23%, list=10%, signal=26% |
| KEGG_AXON_GUIDANCE                                              | 126 | -0.39 | -1.76 | 0.002 | 0.018 | 0.241 | 5176 tags=33%, list=21%, signal=42% |
| KEGG_ENDOMETRIAL_CANCER                                         | 52  | -0.51 | -1.73 | 0.008 | 0.021 | 0.29  | 6303 tags=50%, list=25%, signal=67% |
| KEGG_FC_GAMMA_R_MEDIATED_PHAGOCYTOSIS                           | 88  | -0.45 | -1.73 | 0.011 | 0.021 | 0.297 | 2487 tags=34%, list=10%, signal=38% |
| KEGG_RENAL_CELL_CARCINOMA                                       | 66  | -0.47 | -1.73 | 0.014 | 0.021 | 0.3   | 6051 tags=47%, list=24%, signal=62% |
| KEGG_JAK_STAT_SIGNALING_PATHWAY                                 | 149 | -0.38 | -1.73 | 0.002 | 0.021 | 0.315 | 3726 tags=28%, list=15%, signal=33% |
| KEGG_INSULIN_SIGNALING_PATHWAY                                  | 133 | -0.41 | -1.73 | 0.01  | 0.021 | 0.316 | 3364 tags=30%, list=13%, signal=35% |
| KEGG_PROSTATE_CANCER                                            | 88  | -0.44 | -1.71 | 0.006 | 0.024 | 0.36  | 3337 tags=30%, list=13%, signal=34% |
| KEGG_TYPE_II_DIABETES_MELLITUS                                  | 44  | -0.46 | -1.66 | 0.012 | 0.036 | 0.471 | 6266 tags=41%, list=25%, signal=54% |
| KEGG_REGULATION_OF_ACTIN_CYTOSKELETON                           | 200 | -0.37 | -1.65 | 0.012 | 0.036 | 0.481 | 3839 tags=26%, list=15%, signal=31% |
| KEGG_GLIOMA                                                     | 63  | -0.43 | -1.63 | 0.014 | 0.042 | 0.535 | 3337 tags=27%, list=13%, signal=31% |
| KEGG_GALACTOSE_METABOLISM                                       | 25  | -0.48 | -1.63 | 0.016 | 0.042 | 0.544 | 3926 tags=44%, list=16%, signal=52% |
| KEGG_FOCAL_ADHESION                                             | 189 | -0.36 | -1.62 | 0.014 | 0.043 | 0.56  | 3910 tags=25%, list=16%, signal=30% |
| KEGG_VASCULAR_SMOOTH_MUSCLE_CONTRACTION                         | 109 | -0.36 | -1.58 | 0.004 | 0.061 | 0.668 | 3371 tags=28%, list=13%, signal=32% |
| KEGG_BASAL_CELL_CARCINOMA                                       | 55  | -0.41 | -1.57 | 0.02  | 0.062 | 0.684 | 4939 tags=27%, list=20%, signal=34% |
| KEGG_GLYCOSAMINOGLYCAN_BIOSYNTHESIS_CHONDROITIN_SULFATE         | 20  | -0.49 | -1.55 | 0.031 | 0.069 | 0.722 | 6402 tags=55%, list=25%, signal=74% |
| KEGG_ABC_TRANSPORTERS                                           | 44  | -0.42 | -1.55 | 0.029 | 0.071 | 0.735 | 5460 tags=36%, list=22%, signal=46% |
| KEGG_ENDOCYTOSIS                                                | 161 | -0.34 | -1.51 | 0.025 | 0.092 | 0.818 | 3539 tags=25%, list=14%, signal=29% |
| KEGG_PRIMARY_IMMUNODEFICIENCY                                   | 35  | -0.5  | -1.5  | 0.085 | 0.098 | 0.84  | 4807 tags=51%, list=19%, signal=64% |
| KEGG_THYROID_CANCER                                             | 29  | -0.46 | -1.49 | 0.064 | 0.097 | 0.844 | 4178 tags=31%, list=17%, signal=37% |
| KEGG_LONG_TERM_POTENTIATION                                     | 68  | -0.36 | -1.46 | 0.044 | 0.116 | 0.89  | 3243 tags=25%, list=13%, signal=29% |
| KEGG_MTOR_SIGNALING_PATHWAY                                     | 47  | -0.39 | -1.46 | 0.068 | 0.116 | 0.891 | 1335 tags=19%, list=5%, signal=20%  |
| KEGG_CALCIIUM_SIGNALING_PATHWAY                                 | 171 | -0.31 | -1.43 | 0.017 | 0.13  | 0.916 | 3243 tags=20%, list=13%, signal=23% |
| KEGG_ARRHYTHMOGENIC_RIGHT_VENTRICULAR_CARDIOMYOPATHY_ARVC       | 74  | -0.34 | -1.43 | 0.03  | 0.131 | 0.922 | 4054 tags=27%, list=16%, signal=32% |
| KEGG_PATHOGENIC_ESCHERICHIA_COLI_INFECTION                      | 52  | -0.38 | -1.43 | 0.071 | 0.128 | 0.923 | 4796 tags=42%, list=19%, signal=52% |
| KEGG_AMINOACYL_TRNA_BIOSYNTHESIS                                | 22  | -0.51 | -1.43 | 0.092 | 0.128 | 0.925 | 4976 tags=41%, list=20%, signal=51% |
| KEGG_ADIPOCYTOKINE_SIGNALING_PATHWAY                            | 65  | -0.36 | -1.42 | 0.052 | 0.128 | 0.926 | 4329 tags=37%, list=17%, signal=44% |
| KEGG_CELL_ADHESION_MOLECULES_CAMS                               | 130 | -0.31 | -1.42 | 0.022 | 0.127 | 0.926 | 4795 tags=32%, list=19%, signal=39% |
| KEGG_TGF_BETA_SIGNALING_PATHWAY                                 | 84  | -0.34 | -1.42 | 0.05  | 0.13  | 0.933 | 6051 tags=40%, list=24%, signal=53% |
| KEGG_FRUCTOSE_AND_MANNOSE_METABOLISM                            | 32  | -0.43 | -1.41 | 0.11  | 0.13  | 0.937 | 7060 tags=47%, list=28%, signal=65% |
| KEGG_NATURAL_KILLER_CELL_MEDIATED_CYTOTOXICITY                  | 133 | -0.32 | -1.4  | 0.058 | 0.137 | 0.949 | 4761 tags=32%, list=19%, signal=40% |
| KEGG_SMALL_CELL_LUNG_CANCER                                     | 82  | -0.35 | -1.4  | 0.055 | 0.136 | 0.952 | 3503 tags=29%, list=14%, signal=34% |
| KEGG_DILATED_CARDIOMYOPATHY                                     | 90  | -0.33 | -1.39 | 0.044 | 0.138 | 0.954 | 3842 tags=24%, list=15%, signal=29% |
| KEGG_DORSO_VENTRAL_AXIS_FORMATION                               | 24  | -0.45 | -1.38 | 0.118 | 0.142 | 0.96  | 6303 tags=42%, list=25%, signal=56% |
| KEGG_HEMATOPOIETIC_CELL_LINEAGE                                 | 86  | -0.32 | -1.36 | 0.048 | 0.162 | 0.972 | 4876 tags=35%, list=19%, signal=43% |
| KEGG_VIRAL_MYOCARDITIS                                          | 70  | -0.35 | -1.35 | 0.095 | 0.166 | 0.972 | 3762 tags=33%, list=15%, signal=39% |
| KEGG_ALANINE_ASPARTATE_AND_Glutamate_Metabolism                 | 30  | -0.4  | -1.33 | 0.113 | 0.178 | 0.979 | 3509 tags=30%, list=14%, signal=35% |
| KEGG_CYTOKINE_CYTOKINE_RECEPTOR_INTERACTION                     | 253 | -0.27 | -1.33 | 0.037 | 0.181 | 0.983 | 6112 tags=32%, list=24%, signal=42% |
| KEGG_TASTE_TRANSDUCTION                                         | 48  | -0.34 | -1.32 | 0.095 | 0.185 | 0.983 | 7911 tags=40%, list=31%, signal=58% |
| KEGG_MELANOMA                                                   | 71  | -0.33 | -1.32 | 0.085 | 0.182 | 0.984 | 2456 tags=14%, list=10%, signal=16% |
| KEGG_GLYCEROPHOSPHOLIPID_METABOLISM                             | 63  | -0.35 | -1.31 | 0.105 | 0.187 | 0.986 | 4948 tags=30%, list=20%, signal=37% |
| KEGG_VASOPRESSIN_REGULATED_WATER_REABSORPTION                   | 44  | -0.33 | -1.3  | 0.12  | 0.198 | 0.989 | 1964 tags=23%, list=8%, signal=25%  |
| KEGG_EPITHELIAL_CELL_SIGNALING_IN_HELICOBACTER_PYLORI_INFECTION | 65  | -0.32 | -1.3  | 0.115 | 0.196 | 0.989 | 6112 tags=48%, list=24%, signal=63% |
| KEGG_LYSOSOME                                                   | 116 | -0.33 | -1.29 | 0.171 | 0.198 | 0.989 | 5713 tags=44%, list=23%, signal=57% |
| KEGG_APOPTOSIS                                                  | 84  | -0.31 | -1.29 | 0.126 | 0.197 | 0.989 | 3603 tags=29%, list=14%, signal=33% |
| KEGG_LYSINE_DEGRADATION                                         | 39  | -0.37 | -1.29 | 0.172 | 0.197 | 0.989 | 3052 tags=33%, list=12%, signal=38% |

|                                                               |     |       |       |       |       |       |                                     |
|---------------------------------------------------------------|-----|-------|-------|-------|-------|-------|-------------------------------------|
| KEGG_PHENYLALANINE_METABOLISM                                 | 17  | -0.42 | -1.29 | 0.141 | 0.196 | 0.989 | 5013 tags=29%, list=20%, signal=37% |
| KEGG_PENTOSE_PHOSPHATE_PATHWAY                                | 26  | -0.4  | -1.28 | 0.17  | 0.194 | 0.99  | 3015 tags=35%, list=12%, signal=39% |
| KEGG_VIBRIO_CHOLERAE_INFECTION                                | 52  | -0.34 | -1.28 | 0.165 | 0.192 | 0.99  | 6120 tags=54%, list=24%, signal=71% |
| KEGG_SELENOAMINO_ACID_METABOLISM                              | 24  | -0.39 | -1.25 | 0.179 | 0.221 | 0.997 | 5251 tags=42%, list=21%, signal=53% |
| KEGG_TYROSINE_METABOLISM                                      | 40  | -0.33 | -1.24 | 0.143 | 0.239 | 0.997 | 5013 tags=25%, list=20%, signal=31% |
| KEGG_PROGESTERONE_MEDIATED_OOCYTE_MATURATION                  | 84  | -0.3  | -1.24 | 0.166 | 0.236 | 0.997 | 3459 tags=25%, list=14%, signal=29% |
| KEGG_LINOLEIC_ACID_METABOLISM                                 | 27  | -0.37 | -1.21 | 0.205 | 0.259 | 0.998 | 7712 tags=48%, list=31%, signal=69% |
| KEGG_ETHER_LIPID_METABOLISM                                   | 27  | -0.36 | -1.21 | 0.193 | 0.257 | 0.998 | 3860 tags=30%, list=15%, signal=35% |
| KEGG_ARGININE_AND_PROLINE_METABOLISM                          | 50  | -0.31 | -1.2  | 0.197 | 0.266 | 1     | 3599 tags=26%, list=14%, signal=30% |
| KEGG_PRION_DISEASES                                           | 35  | -0.33 | -1.19 | 0.223 | 0.271 | 1     | 6115 tags=34%, list=24%, signal=45% |
| KEGG_SPHINGOLIPID_METABOLISM                                  | 31  | -0.33 | -1.18 | 0.227 | 0.283 | 1     | 7572 tags=48%, list=30%, signal=69% |
| KEGG_GLYCOSPHINGOLIPID_BIOSYNTHESIS_LACTO_AND_NEOLACTO_SERIES | 25  | -0.36 | -1.17 | 0.232 | 0.29  | 1     | 5548 tags=32%, list=22%, signal=41% |
| KEGG_HEDGEHOG_SIGNALING_PATHWAY                               | 56  | -0.29 | -1.16 | 0.247 | 0.303 | 1     | 4971 tags=23%, list=20%, signal=29% |
| KEGG_STEROID_BIOSYNTHESIS                                     | 15  | -0.43 | -1.15 | 0.295 | 0.308 | 1     | 2238 tags=27%, list=9%, signal=29%  |
| KEGG_LEISHMANIA_INFECTION                                     | 68  | -0.31 | -1.14 | 0.307 | 0.314 | 1     | 4778 tags=37%, list=19%, signal=45% |
| KEGG_ALPHA_LINOLENIC_ACID_METABOLISM                          | 17  | -0.39 | -1.13 | 0.278 | 0.318 | 1     | 6251 tags=41%, list=25%, signal=55% |
| KEGG_GLYCEROLIPID_METABOLISM                                  | 40  | -0.3  | -1.12 | 0.259 | 0.328 | 1     | 4647 tags=25%, list=18%, signal=31% |
| KEGG_PANTOTHENATE_AND_COA_BIOSYNTHESIS                        | 16  | -0.37 | -1.12 | 0.297 | 0.325 | 1     | 759 tags=13%, list=3%, signal=13%   |
| KEGG_STARCH_AND_SUCROSE_METABOLISM                            | 51  | -0.31 | -1.11 | 0.318 | 0.335 | 1     | 5713 tags=37%, list=23%, signal=48% |
| KEGG_RENIN_ANGIOTENSIN_SYSTEM                                 | 17  | -0.38 | -1.09 | 0.372 | 0.359 | 1     | 1836 tags=18%, list=7%, signal=19%  |
| KEGG_CELL_CYCLE                                               | 114 | -0.27 | -1.08 | 0.348 | 0.374 | 1     | 5881 tags=35%, list=23%, signal=46% |
| KEGG_HYPERTROPHIC_CARDIOMYOPATHY_HCM                          | 83  | -0.24 | -1.05 | 0.345 | 0.411 | 1     | 3842 tags=20%, list=15%, signal=24% |
| KEGG_BASE_EXCISION_REPAIR                                     | 32  | -0.33 | -1.04 | 0.392 | 0.42  | 1     | 3275 tags=31%, list=13%, signal=36% |
| KEGG_MATURITY_ONSET_DIABETES_OF_THE_YOUNG                     | 20  | -0.35 | -1.03 | 0.41  | 0.434 | 1     | 6266 tags=40%, list=25%, signal=53% |
| KEGG_GLYCOSAMINOGLYCAN_BIOSYNTHESIS_HEPARAN_SULFATE           | 26  | -0.28 | -0.99 | 0.464 | 0.486 | 1     | 4522 tags=27%, list=18%, signal=33% |
| KEGG_TOLL_LIKE_RECEPTOR_SIGNALING_PATHWAY                     | 99  | -0.24 | -0.96 | 0.503 | 0.528 | 1     | 3533 tags=21%, list=14%, signal=25% |
| KEGG_GLYCOSAMINOGLYCAN_DEGRADATION                            | 21  | -0.33 | -0.96 | 0.508 | 0.537 | 1     | 5713 tags=38%, list=23%, signal=49% |
| KEGG_RIG_I_LIKE_RECEPTOR_SIGNALING_PATHWAY                    | 64  | -0.24 | -0.95 | 0.515 | 0.539 | 1     | 3099 tags=22%, list=12%, signal=25% |
| KEGG_NITROGEN_METABOLISM                                      | 23  | -0.3  | -0.95 | 0.545 | 0.536 | 1     | 3587 tags=26%, list=14%, signal=30% |
| KEGG_ARACHIDONIC_ACID_METABOLISM                              | 55  | -0.23 | -0.92 | 0.6   | 0.583 | 1     | 6956 tags=35%, list=28%, signal=48% |
| KEGG_AMYOTROPHIC_LATERAL_SCLEROSIS_ALS                        | 52  | -0.22 | -0.91 | 0.606 | 0.596 | 1     | 4517 tags=25%, list=18%, signal=30% |
| KEGG_NICOTINATE_AND_NICOTINAMIDE_METABOLISM                   | 21  | -0.27 | -0.84 | 0.666 | 0.716 | 1     | 7030 tags=38%, list=28%, signal=53% |
| KEGG_GLYCOSPHINGOLIPID_BIOSYNTHESIS_GANGLIO_SERIES            | 15  | -0.27 | -0.82 | 0.722 | 0.744 | 1     | 3515 tags=20%, list=14%, signal=23% |
| KEGG_RETINOL_METABOLISM                                       | 62  | -0.18 | -0.73 | 0.937 | 0.864 | 1     | 5472 tags=21%, list=22%, signal=27% |
| KEGG_GLYCINE_SERINE_AND_THREONINE_METABOLISM                  | 31  | -0.18 | -0.63 | 0.964 | 0.948 | 1     | 5010 tags=19%, list=20%, signal=24% |

# GSEA-NCF2

GS follow link to MSigDB

|                                                | SIZE | ES   | NES  | NOM p-val | FDR q-val | FWER p-val | RANK AT MAX | LEADING EDGE                   |
|------------------------------------------------|------|------|------|-----------|-----------|------------|-------------|--------------------------------|
| KEGG_COMPLEMENT_AND_COAGULATION_CASCADES       | 68   | 0.46 | 1.76 | 0.01      | 0.351     | 0.29       | 6958        | tags=51%, list=28%, signal=71% |
| KEGG_O_GLYCAN_BIOSYNTHESIS                     | 25   | 0.53 | 1.69 | 0.006     | 0.318     | 0.43       | 3519        | tags=36%, list=14%, signal=42% |
| KEGG_LEUKOCYTE_TRANSENDOTHELIAL_MIGRATION      | 108  | 0.41 | 1.65 | 0.018     | 0.297     | 0.525      | 4996        | tags=35%, list=20%, signal=44% |
| KEGG_STARCH_AND_SUCROSE_METABOLISM             | 51   | 0.44 | 1.6  | 0.024     | 0.336     | 0.646      | 3945        | tags=31%, list=16%, signal=37% |
| KEGG_ALPHA_LINOLENIC_ACID_METABOLISM           | 17   | 0.53 | 1.57 | 0.042     | 0.335     | 0.713      | 4124        | tags=41%, list=16%, signal=49% |
| KEGG_NICOTINATE_AND_NICOTINAMIDE_METABOLISM    | 21   | 0.51 | 1.55 | 0.049     | 0.302     | 0.736      | 4525        | tags=48%, list=18%, signal=58% |
| KEGG_FC_GAMMA_R_MEDIATED_PHAGOCYTOSIS          | 88   | 0.42 | 1.55 | 0.05      | 0.275     | 0.749      | 4366        | tags=39%, list=17%, signal=47% |
| KEGG_INOSITOL_PHOSPHATE_METABOLISM             | 49   | 0.43 | 1.54 | 0.048     | 0.258     | 0.763      | 1891        | tags=20%, list=8%, signal=22%  |
| KEGG_GLYCEROPHOSPHOLIPID_METABOLISM            | 63   | 0.39 | 1.46 | 0.048     | 0.385     | 0.877      | 5177        | tags=43%, list=21%, signal=54% |
| KEGG_TYPE_II_DIABETES_MELLITUS                 | 44   | 0.39 | 1.4  | 0.095     | 0.489     | 0.935      | 4709        | tags=36%, list=19%, signal=45% |
| KEGG_REGULATION_OF_AUTOPHAGY                   | 34   | 0.39 | 1.4  | 0.069     | 0.449     | 0.936      | 3741        | tags=32%, list=15%, signal=38% |
| KEGG_PRIMARY_BILE_ACID_BIOSYNTHESIS            | 16   | 0.47 | 1.39 | 0.1       | 0.432     | 0.942      | 4876        | tags=38%, list=19%, signal=46% |
| KEGG_PHOSPHATIDYLINOSITOL_SIGNALING_SYSTEM     | 70   | 0.36 | 1.34 | 0.119     | 0.503     | 0.967      | 1891        | tags=19%, list=8%, signal=20%  |
| KEGG_FC_EPSILON_RI_SIGNALING_PATHWAY           | 76   | 0.35 | 1.34 | 0.112     | 0.47      | 0.968      | 4324        | tags=30%, list=17%, signal=36% |
| KEGG_REGULATION_OF_ACTIN_CYTOSKELETON          | 200  | 0.3  | 1.33 | 0.096     | 0.457     | 0.972      | 4605        | tags=28%, list=18%, signal=33% |
| KEGG_ADIPOCYTOKINE_SIGNALING_PATHWAY           | 65   | 0.34 | 1.33 | 0.106     | 0.442     | 0.974      | 4709        | tags=34%, list=21%, signal=42% |
| KEGG_INSULIN_SIGNALING_PATHWAY                 | 133  | 0.31 | 1.3  | 0.128     | 0.481     | 0.986      | 4986        | tags=34%, list=20%, signal=42% |
| KEGG_SNARE_INTERACTIONS_IN_VESICULAR_TRANSPORT | 37   | 0.34 | 1.29 | 0.121     | 0.471     | 0.987      | 4445        | tags=32%, list=18%, signal=39% |
| KEGG_ETHER_LIPID_METABOLISM                    | 27   | 0.39 | 1.29 | 0.141     | 0.46      | 0.99       | 4124        | tags=37%, list=16%, signal=44% |
| KEGG_RENAL_CELL_CARCINOMA                      | 66   | 0.35 | 1.27 | 0.198     | 0.476     | 0.992      | 6587        | tags=50%, list=26%, signal=68% |
| KEGG_NATURAL_KILLER_CELL_MEDIATED_CYTOTOXICITY | 133  | 0.3  | 1.25 | 0.151     | 0.484     | 0.995      | 2033        | tags=17%, list=8%, signal=19%  |
| KEGG_PPAR_SIGNALING_PATHWAY                    | 68   | 0.31 | 1.25 | 0.154     | 0.482     | 0.996      | 2328        | tags=18%, list=9%, signal=19%  |
| KEGG_MATURITY_ONSET_DIABETES_OF_THE_YOUNG      | 20   | 0.41 | 1.24 | 0.175     | 0.467     | 0.996      | 3625        | tags=25%, list=14%, signal=29% |
| KEGG_MTOR_SIGNALING_PATHWAY                    | 47   | 0.33 | 1.24 | 0.159     | 0.449     | 0.996      | 4556        | tags=36%, list=18%, signal=44% |
| KEGG_ALDOSTERONE_REGULATED_SODIUM_REABSORPTION | 40   | 0.35 | 1.23 | 0.203     | 0.457     | 0.998      | 4717        | tags=33%, list=19%, signal=40% |
| KEGG_ARACHIDONIC_ACID_METABOLISM               | 55   | 0.31 | 1.23 | 0.138     | 0.441     | 0.998      | 2060        | tags=16%, list=8%, signal=18%  |
| KEGG_CYTOKINE_CYTOKINE_RECEPTOR_INTERACTION    | 253  | 0.25 | 1.19 | 0.137     | 0.503     | 0.999      | 4074        | tags=23%, list=16%, signal=27% |
| KEGG_GALACTOSE_METABOLISM                      | 25   | 0.36 | 1.18 | 0.252     | 0.512     | 0.999      | 2711        | tags=28%, list=11%, signal=31% |
| KEGG_VEGF_SIGNALING_PATHWAY                    | 72   | 0.3  | 1.17 | 0.213     | 0.5       | 0.999      | 4368        | tags=31%, list=17%, signal=37% |
| KEGG_ERBB_SIGNALING_PATHWAY                    | 84   | 0.3  | 1.16 | 0.231     | 0.502     | 0.999      | 4366        | tags=30%, list=17%, signal=36% |
| KEGG_PANTOTHENATE_AND_COA_BIOSYNTHESIS         | 16   | 0.39 | 1.16 | 0.263     | 0.502     | 0.999      | 4782        | tags=38%, list=19%, signal=46% |
| KEGG_NEUROACTIVE_LIGAND_RECEPTOR_INTERACTION   | 256  | 0.24 | 1.14 | 0.198     | 0.52      | 0.999      | 5501        | tags=24%, list=22%, signal=31% |
| KEGG_LEISHMANIA_INFECTION                      | 68   | 0.32 | 1.14 | 0.297     | 0.509     | 0.999      | 854         | tags=13%, list=3%, signal=14%  |
| KEGG_MAPK_SIGNALING_PATHWAY                    | 256  | 0.25 | 1.13 | 0.243     | 0.503     | 0.999      | 4535        | tags=27%, list=18%, signal=33% |
| KEGG_P53_SIGNALING_PATHWAY                     | 64   | 0.29 | 1.1  | 0.315     | 0.56      | 0.999      | 3023        | tags=25%, list=12%, signal=28% |
| KEGG_CHEMOKINE_SIGNALING_PATHWAY               | 181  | 0.25 | 1.08 | 0.313     | 0.579     | 0.999      | 5020        | tags=29%, list=20%, signal=36% |
| KEGG_LONG_TERM_DEPRESSION                      | 64   | 0.27 | 1.08 | 0.327     | 0.566     | 0.999      | 5105        | tags=27%, list=20%, signal=33% |
| KEGG_APOPTOSIS                                 | 84   | 0.26 | 1.08 | 0.337     | 0.555     | 0.999      | 1554        | tags=17%, list=6%, signal=18%  |
| KEGG_JAK_STAT_SIGNALING_PATHWAY                | 149  | 0.24 | 1.06 | 0.336     | 0.572     | 1          | 4560        | tags=24%, list=18%, signal=29% |
| KEGG_ABC_TRANSPORTERS                          | 44   | 0.29 | 1.06 | 0.372     | 0.573     | 1          | 4344        | tags=32%, list=17%, signal=38% |
| KEGG_TERPENOID_BACKBONE_BIOSYNTHESIS           | 15   | 0.39 | 1.05 | 0.396     | 0.562     | 1          | 355         | tags=13%, list=1%, signal=14%  |
| KEGG_DORSO_VENTRAL_AXIS_FORMATION              | 24   | 0.34 | 1.04 | 0.398     | 0.572     | 1          | 7394        | tags=46%, list=29%, signal=65% |
| KEGG_GNRH_SIGNALING_PATHWAY                    | 98   | 0.26 | 1.04 | 0.378     | 0.567     | 1          | 5600        | tags=32%, list=22%, signal=41% |
| KEGG_AMYOTROPHIC_LATERAL_SCLEROSIS_ALS         | 52   | 0.26 | 1.03 | 0.399     | 0.568     | 1          | 3831        | tags=25%, list=15%, signal=29% |
| KEGG_NOD_LIKE_RECEPTOR_SIGNALING_PATHWAY       | 55   | 0.27 | 0.99 | 0.443     | 0.635     | 1          | 4008        | tags=25%, list=16%, signal=30% |
| KEGG_VASCULAR_SMOOTH_MUSCLE_CONTRACTION        | 109  | 0.22 | 0.96 | 0.513     | 0.682     | 1          | 4902        | tags=25%, list=20%, signal=31% |



|                                                                 |     |       |       |       |       |       |      |           |           |            |
|-----------------------------------------------------------------|-----|-------|-------|-------|-------|-------|------|-----------|-----------|------------|
| KEGG_OLFACTORY_TRANSDUCTION                                     | 379 | 0.2   | 0.96  | 0.54  | 0.672 | 1     | 5630 | tags=23%, | list=22%, | signal=29% |
| KEGG_SPHINGOLIPID_METABOLISM                                    | 31  | 0.27  | 0.94  | 0.53  | 0.698 | 1     | 3606 | tags=23%, | list=14%, | signal=26% |
| KEGG_ADHERENS_JUNCTION                                          | 68  | 0.24  | 0.94  | 0.54  | 0.701 | 1     | 4008 | tags=22%, | list=16%, | signal=26% |
| KEGG_EPITHELIAL_CELL_SIGNALING_IN_HELICOBACTER_PYLORI_INFECTION | 65  | 0.24  | 0.93  | 0.564 | 0.702 | 1     | 4376 | tags=22%, | list=17%, | signal=26% |
| KEGG_NOTCH_SIGNALING_PATHWAY                                    | 44  | 0.27  | 0.92  | 0.56  | 0.702 | 1     | 3638 | tags=25%, | list=14%, | signal=29% |
| KEGG_RIG_I_LIKE_RECEPTOR_SIGNALING_PATHWAY                      | 64  | 0.23  | 0.91  | 0.603 | 0.701 | 1     | 4158 | tags=25%, | list=17%, | signal=30% |
| KEGG_GLYCOSPHINGOLIPID_BIOSYNTHESIS_LACTO_AND_NEOLACTO_SERIES   | 25  | 0.28  | 0.91  | 0.592 | 0.697 | 1     | 1876 | tags=16%, | list=7%,  | signal=17% |
| KEGG_PANCREATIC_CANCER                                          | 69  | 0.25  | 0.91  | 0.554 | 0.685 | 1     | 4008 | tags=29%, | list=16%, | signal=34% |
| KEGG_FOCAL_ADHESION                                             | 189 | 0.21  | 0.91  | 0.611 | 0.676 | 1     | 4605 | tags=23%, | list=18%, | signal=28% |
| KEGG_TOLL_LIKE_RECEPTOR_SIGNALING_PATHWAY                       | 99  | 0.23  | 0.9   | 0.583 | 0.682 | 1     | 4008 | tags=20%, | list=16%, | signal=24% |
| KEGG_ENDOCYTOSIS                                                | 161 | 0.2   | 0.88  | 0.645 | 0.709 | 1     | 2650 | tags=15%, | list=11%, | signal=17% |
| KEGG_LINOLEIC_ACID_METABOLISM                                   | 27  | 0.26  | 0.86  | 0.672 | 0.74  | 1     | 4124 | tags=22%, | list=16%, | signal=27% |
| KEGG_NON_SMALL_CELL_LUNG_CANCER                                 | 53  | 0.24  | 0.81  | 0.69  | 0.805 | 1     | 4324 | tags=28%, | list=17%, | signal=34% |
| KEGG_MELANOGENESIS                                              | 100 | 0.19  | 0.8   | 0.805 | 0.825 | 1     | 6992 | tags=36%, | list=28%, | signal=50% |
| KEGG_GLYCOSPHINGOLIPID_BIOSYNTHESIS_GANGLIO_SERIES              | 15  | 0.26  | 0.79  | 0.739 | 0.817 | 1     | 4040 | tags=27%, | list=16%, | signal=32% |
| KEGG_RENIN_ANGIOTENSIN_SYSTEM                                   | 17  | 0.28  | 0.78  | 0.769 | 0.82  | 1     | 5019 | tags=29%, | list=20%, | signal=37% |
| KEGG_HEDGEHOG_SIGNALING_PATHWAY                                 | 56  | 0.19  | 0.77  | 0.87  | 0.824 | 1     | 5523 | tags=23%, | list=22%, | signal=30% |
| KEGG_NITROGEN_METABOLISM                                        | 23  | 0.23  | 0.74  | 0.864 | 0.86  | 1     | 6675 | tags=43%, | list=27%, | signal=59% |
| KEGG_HYPERTROPHIC_CARDIOMYOPATHY_HCM                            | 83  | 0.15  | 0.65  | 0.992 | 0.932 | 1     | 4527 | tags=19%, | list=18%, | signal=23% |
| KEGG_LYSINE_DEGRADATION                                         | 39  | -0.61 | -2.09 | 0     | 0.01  | 0.005 | 4769 | tags=44%, | list=19%, | signal=54% |
| KEGG_PROTEIN_EXPORT                                             | 21  | -0.73 | -1.92 | 0.002 | 0.048 | 0.06  | 2813 | tags=48%, | list=11%, | signal=54% |
| KEGG_INTESTINAL_IMMUNE_NETWORK_FOR_IGA_PRODUCTION               | 48  | -0.54 | -1.86 | 0.002 | 0.065 | 0.122 | 3068 | tags=35%, | list=12%, | signal=40% |
| KEGG_DNA_REPLICATION                                            | 35  | -0.58 | -1.82 | 0.01  | 0.074 | 0.176 | 4424 | tags=57%, | list=18%, | signal=69% |
| KEGG_NUCLEOTIDE_EXCISION_REPAIR                                 | 43  | -0.53 | -1.81 | 0.006 | 0.063 | 0.183 | 5486 | tags=49%, | list=22%, | signal=62% |
| KEGG_ASTHMA                                                     | 30  | -0.59 | -1.8  | 0.011 | 0.064 | 0.212 | 3068 | tags=40%, | list=12%, | signal=46% |
| KEGG_GLYOXYLATE_AND_DICARBOXYLATE_METABOLISM                    | 15  | -0.63 | -1.76 | 0.004 | 0.079 | 0.279 | 1379 | tags=33%, | list=5%,  | signal=35% |
| KEGG_MISMATCH_REPAIR                                            | 22  | -0.59 | -1.74 | 0.006 | 0.09  | 0.334 | 4273 | tags=50%, | list=17%, | signal=60% |
| KEGG_BASE_EXCISION_REPAIR                                       | 32  | -0.53 | -1.71 | 0.01  | 0.102 | 0.393 | 4337 | tags=50%, | list=17%, | signal=60% |
| KEGG_N_GLYCAN_BIOSYNTHESIS                                      | 44  | -0.47 | -1.7  | 0.016 | 0.1   | 0.413 | 3784 | tags=34%, | list=15%, | signal=40% |
| KEGG_PROTEASOME                                                 | 42  | -0.57 | -1.68 | 0.043 | 0.107 | 0.455 | 4721 | tags=50%, | list=19%, | signal=61% |
| KEGG_BUTANOATE_METABOLISM                                       | 34  | -0.49 | -1.67 | 0.008 | 0.105 | 0.47  | 4620 | tags=41%, | list=18%, | signal=50% |
| KEGG_PYRUVATE_METABOLISM                                        | 39  | -0.5  | -1.66 | 0.024 | 0.105 | 0.495 | 2773 | tags=36%, | list=11%, | signal=40% |
| KEGG_CITRATE_CYCLE_TCA_CYCLE                                    | 30  | -0.5  | -1.65 | 0.031 | 0.104 | 0.515 | 2182 | tags=30%, | list=9%,  | signal=33% |
| KEGG_CELL_CYCLE                                                 | 114 | -0.42 | -1.65 | 0.019 | 0.097 | 0.515 | 3653 | tags=32%, | list=15%, | signal=37% |
| KEGG_DRUG_METABOLISM_OTHER_ENZYMES                              | 48  | -0.43 | -1.64 | 0.014 | 0.104 | 0.554 | 5208 | tags=42%, | list=21%, | signal=52% |
| KEGG_ALLOGRAFT_REJECTION                                        | 37  | -0.5  | -1.64 | 0.037 | 0.099 | 0.556 | 4997 | tags=51%, | list=20%, | signal=64% |
| KEGG_SELENOAMINO_ACID_METABOLISM                                | 24  | -0.5  | -1.63 | 0.02  | 0.095 | 0.559 | 1060 | tags=21%, | list=4%,  | signal=22% |
| KEGG_PYRIMIDINE_METABOLISM                                      | 90  | -0.39 | -1.61 | 0.012 | 0.105 | 0.601 | 6107 | tags=46%, | list=24%, | signal=60% |
| KEGG_PENTOSE_AND_GLUCURONATE_INTERCONVERSIONS                   | 27  | -0.47 | -1.58 | 0.02  | 0.127 | 0.672 | 3478 | tags=33%, | list=14%, | signal=39% |
| KEGG_RNA_POLYMERASE                                             | 26  | -0.51 | -1.57 | 0.043 | 0.128 | 0.686 | 3230 | tags=42%, | list=13%, | signal=48% |
| KEGG_PURINE_METABOLISM                                          | 142 | -0.36 | -1.56 | 0.014 | 0.131 | 0.704 | 3230 | tags=27%, | list=13%, | signal=31% |
| KEGG_SPLICEOSOME                                                | 103 | -0.38 | -1.53 | 0.038 | 0.16  | 0.768 | 6789 | tags=51%, | list=27%, | signal=70% |
| KEGG_PRION_DISEASES                                             | 35  | -0.42 | -1.51 | 0.032 | 0.166 | 0.782 | 3711 | tags=29%, | list=15%, | signal=33% |
| KEGG_PRIMARY_IMMUNODEFICIENCY                                   | 35  | -0.49 | -1.51 | 0.058 | 0.165 | 0.79  | 4262 | tags=49%, | list=17%, | signal=58% |
| KEGG_TYPE_I_DIABETES_MELLITUS                                   | 43  | -0.43 | -1.51 | 0.056 | 0.159 | 0.792 | 4997 | tags=42%, | list=20%, | signal=52% |
| KEGG_VIBRIO_CHOLERAE_INFECTION                                  | 52  | -0.4  | -1.5  | 0.049 | 0.158 | 0.802 | 4905 | tags=27%, | list=20%, | signal=33% |
| KEGG_ONE_CARBON_POOL_BY_FOLATE                                  | 17  | -0.52 | -1.5  | 0.063 | 0.159 | 0.812 | 1647 | tags=29%, | list=7%,  | signal=31% |

|                                                     |     |       |       |       |       |       |                                     |
|-----------------------------------------------------|-----|-------|-------|-------|-------|-------|-------------------------------------|
| KEGG_PROPANOATE_METABOLISM                          | 31  | -0.49 | -1.5  | 0.067 | 0.153 | 0.812 | 4620 tags=42%, list=18%, signal=51% |
| KEGG_VALINE_LEUCINE_AND_ISOLEUCINE_DEGRADATION      | 43  | -0.44 | -1.49 | 0.066 | 0.151 | 0.817 | 4941 tags=44%, list=20%, signal=55% |
| KEGG_VIRAL_MYOCARDITIS                              | 70  | -0.38 | -1.48 | 0.064 | 0.163 | 0.839 | 3211 tags=24%, list=13%, signal=28% |
| KEGG_HUNTINGTONS_DISEASE                            | 149 | -0.34 | -1.47 | 0.072 | 0.161 | 0.843 | 3153 tags=26%, list=13%, signal=30% |
| KEGG_AUTOIMMUNE_THYROID_DISEASE                     | 52  | -0.4  | -1.46 | 0.059 | 0.165 | 0.863 | 1352 tags=23%, list=5%, signal=24%  |
| KEGG_OOCYTE_MEIOSIS                                 | 108 | -0.34 | -1.45 | 0.057 | 0.169 | 0.872 | 3852 tags=26%, list=15%, signal=30% |
| KEGG_AMINOACYL_TRNA_BIOSYNTHESIS                    | 22  | -0.49 | -1.45 | 0.077 | 0.172 | 0.882 | 2019 tags=32%, list=8%, signal=35%  |
| KEGG_OXIDATIVE_PHOSPHORYLATION                      | 94  | -0.4  | -1.41 | 0.133 | 0.214 | 0.924 | 4010 tags=30%, list=16%, signal=35% |
| KEGG_PARKINSONS_DISEASE                             | 90  | -0.38 | -1.4  | 0.128 | 0.213 | 0.926 | 3107 tags=28%, list=12%, signal=32% |
| KEGG_RNA_DEGRADATION                                | 51  | -0.4  | -1.4  | 0.09  | 0.216 | 0.931 | 6702 tags=49%, list=27%, signal=67% |
| KEGG_GRAFT_VERSUS_HOST_DISEASE                      | 40  | -0.43 | -1.39 | 0.13  | 0.212 | 0.931 | 4075 tags=40%, list=16%, signal=48% |
| KEGG_PEROXISOME                                     | 73  | -0.34 | -1.37 | 0.065 | 0.24  | 0.949 | 4269 tags=33%, list=17%, signal=39% |
| KEGG_ASCORBATE_AND_ALDARATE_METABOLISM              | 25  | -0.41 | -1.36 | 0.092 | 0.245 | 0.952 | 5208 tags=36%, list=21%, signal=45% |
| KEGG_PENTOSE_PHOSPHATE_PATHWAY                      | 26  | -0.43 | -1.36 | 0.114 | 0.243 | 0.952 | 6698 tags=50%, list=27%, signal=68% |
| KEGG_DRUG_METABOLISM_CYTOCHROME_P450                | 72  | -0.33 | -1.35 | 0.079 | 0.242 | 0.955 | 5880 tags=29%, list=23%, signal=38% |
| KEGG_ALZHEIMERS_DISEASE                             | 137 | -0.31 | -1.34 | 0.105 | 0.254 | 0.966 | 3795 tags=25%, list=15%, signal=29% |
| KEGG_METABOLISM_OF_XENOBIOTICS_BY_CYTOCHROME_P450   | 70  | -0.34 | -1.33 | 0.102 | 0.256 | 0.969 | 6231 tags=34%, list=25%, signal=45% |
| KEGG_ALANINE_ASPARTATE_AND_GLUTAMATE_METABOLISM     | 30  | -0.39 | -1.33 | 0.127 | 0.258 | 0.973 | 4646 tags=40%, list=18%, signal=49% |
| KEGG_RIBOSOME                                       | 85  | -0.54 | -1.3  | 0.265 | 0.283 | 0.977 | 2921 tags=38%, list=12%, signal=42% |
| KEGG_ARGININE_AND_PROLINE_METABOLISM                | 50  | -0.34 | -1.3  | 0.11  | 0.283 | 0.979 | 5331 tags=30%, list=21%, signal=38% |
| KEGG_THYROID_CANCER                                 | 29  | -0.4  | -1.29 | 0.152 | 0.288 | 0.979 | 4785 tags=38%, list=19%, signal=47% |
| KEGG_SYSTEMIC_LUPUS_ERYTHEMATOSUS                   | 56  | -0.34 | -1.29 | 0.143 | 0.293 | 0.979 | 4204 tags=32%, list=17%, signal=39% |
| KEGG_GLYCOLYSIS_GLUCCONEOGENESIS                    | 60  | -0.33 | -1.28 | 0.146 | 0.293 | 0.981 | 4996 tags=35%, list=20%, signal=44% |
| KEGG_SMALL_CELL_LUNG_CANCER                         | 82  | -0.32 | -1.28 | 0.137 | 0.295 | 0.981 | 4745 tags=33%, list=19%, signal=40% |
| KEGG_CYSTEINE_AND_METHIONINE_METABOLISM             | 34  | -0.36 | -1.27 | 0.146 | 0.299 | 0.981 | 2399 tags=21%, list=10%, signal=23% |
| KEGG_WNT_SIGNALING_PATHWAY                          | 147 | -0.29 | -1.26 | 0.132 | 0.311 | 0.982 | 4007 tags=21%, list=16%, signal=25% |
| KEGG_STEROID_HORMONE_BIOSYNTHESIS                   | 55  | -0.31 | -1.24 | 0.147 | 0.333 | 0.986 | 6392 tags=38%, list=25%, signal=51% |
| KEGG_BLADDER_CANCER                                 | 39  | -0.36 | -1.23 | 0.202 | 0.338 | 0.986 | 3600 tags=31%, list=14%, signal=36% |
| KEGG_PROGESTERONE_MEDIATED_OOCYTE_MATURATION        | 84  | -0.3  | -1.23 | 0.17  | 0.334 | 0.987 | 5347 tags=30%, list=21%, signal=38% |
| KEGG_T_CELL_RECEPTOR_SIGNALING_PATHWAY              | 106 | -0.3  | -1.22 | 0.209 | 0.337 | 0.987 | 3772 tags=28%, list=15%, signal=33% |
| KEGG_PROSTATE_CANCER                                | 88  | -0.32 | -1.22 | 0.191 | 0.336 | 0.988 | 3211 tags=24%, list=13%, signal=27% |
| KEGG_HEMATOPOIETIC_CELL_LINEAGE                     | 86  | -0.28 | -1.22 | 0.157 | 0.332 | 0.988 | 3052 tags=23%, list=12%, signal=26% |
| KEGG_COLORECTAL_CANCER                              | 62  | -0.33 | -1.22 | 0.223 | 0.329 | 0.988 | 3211 tags=26%, list=13%, signal=30% |
| KEGG_UBIQUITIN_MEDIATED_PROTEOLYSIS                 | 126 | -0.28 | -1.2  | 0.198 | 0.35  | 0.991 | 5238 tags=35%, list=21%, signal=44% |
| KEGG_ENDOMETRIAL_CANCER                             | 52  | -0.35 | -1.19 | 0.24  | 0.357 | 0.992 | 3211 tags=29%, list=13%, signal=33% |
| KEGG_BASAL_TRANSCRIPTION_FACTORS                    | 35  | -0.34 | -1.17 | 0.263 | 0.387 | 0.995 | 8386 tags=46%, list=33%, signal=69% |
| KEGG_FATTY_ACID_METABOLISM                          | 40  | -0.31 | -1.17 | 0.224 | 0.382 | 0.995 | 4846 tags=35%, list=19%, signal=43% |
| KEGG_VASOPRESSIN_REGULATED_WATER_REABSORPTION       | 44  | -0.29 | -1.14 | 0.247 | 0.423 | 0.998 | 3547 tags=25%, list=14%, signal=29% |
| KEGG_CELL_ADHESION_MOLECULES_CAMS                   | 130 | -0.25 | -1.14 | 0.202 | 0.419 | 0.998 | 2235 tags=16%, list=9%, signal=18%  |
| KEGG_GLYCOSAMINOGLYCAN_BIOSYNTHESIS_HEPARAN_SULFATE | 26  | -0.34 | -1.14 | 0.271 | 0.413 | 0.998 | 4838 tags=35%, list=19%, signal=43% |
| KEGG_FRUCTOSE_AND_MANNANOSE_METABOLISM              | 32  | -0.35 | -1.13 | 0.302 | 0.43  | 0.999 | 4612 tags=34%, list=18%, signal=42% |
| KEGG_BASAL_CELL_CARCINOMA                           | 55  | -0.29 | -1.12 | 0.268 | 0.428 | 0.999 | 3131 tags=18%, list=12%, signal=21% |
| KEGG_HOMOLOGOUS_RECOMBINATION                       | 23  | -0.36 | -1.12 | 0.309 | 0.433 | 1     | 4273 tags=30%, list=17%, signal=37% |
| KEGG_TRYPTOPHAN_METABOLISM                          | 36  | -0.3  | -1.11 | 0.306 | 0.434 | 1     | 4769 tags=28%, list=19%, signal=34% |
| KEGG_BETA_ALANINE_METABOLISM                        | 22  | -0.36 | -1.11 | 0.311 | 0.429 | 1     | 2773 tags=27%, list=11%, signal=31% |
| KEGG_PATHOGENIC_ESCHERICHIA_COLI_INFECTIOIN         | 52  | -0.28 | -1.11 | 0.303 | 0.426 | 1     | 4121 tags=25%, list=16%, signal=30% |
| KEGG_PATHWAYS_IN_CANCER                             | 316 | -0.23 | -1.1  | 0.267 | 0.438 | 1     | 4785 tags=24%, list=19%, signal=29% |

|                                                           |     |       |       |       |       |   |      |                                |
|-----------------------------------------------------------|-----|-------|-------|-------|-------|---|------|--------------------------------|
| KEGG_PORPHYRIN_AND_CHLOROPHYLL_METABOLISM                 | 39  | -0.32 | -1.09 | 0.331 | 0.449 | 1 | 5208 | tags=33%, list=21%, signal=42% |
| KEGG_CYTOSOLIC_DNA_SENSING_PATHWAY                        | 52  | -0.29 | -1.08 | 0.364 | 0.465 | 1 | 2496 | tags=19%, list=10%, signal=21% |
| KEGG_ANTIGEN_PROCESSING_AND_PRESENTATION                  | 86  | -0.28 | -1.07 | 0.357 | 0.465 | 1 | 3068 | tags=23%, list=12%, signal=26% |
| KEGG_GLUTATHIONE_METABOLISM                               | 49  | -0.29 | -1.07 | 0.341 | 0.462 | 1 | 3242 | tags=18%, list=13%, signal=21% |
| KEGG_GLYCINE_SERINE_AND_THREONINE_METABOLISM              | 31  | -0.32 | -1.07 | 0.353 | 0.461 | 1 | 2518 | tags=16%, list=10%, signal=18% |
| KEGG_GLYCEROLIPID_METABOLISM                              | 40  | -0.3  | -1.06 | 0.372 | 0.467 | 1 | 2882 | tags=20%, list=11%, signal=23% |
| KEGG_NEUROTROPHIN_SIGNALING_PATHWAY                       | 124 | -0.26 | -1.06 | 0.366 | 0.465 | 1 | 4384 | tags=27%, list=17%, signal=33% |
| KEGG_B_CELL_RECEPTOR_SIGNALING_PATHWAY                    | 73  | -0.29 | -1.04 | 0.4   | 0.488 | 1 | 3061 | tags=26%, list=12%, signal=30% |
| KEGG_AMINO_SUGAR_AND_NUCLEOTIDE_SUGAR_METABOLISM          | 41  | -0.28 | -1.04 | 0.415 | 0.495 | 1 | 2229 | tags=20%, list=9%, signal=21%  |
| KEGG_GLYCOSYLPHOSPHATIDYLINOSITOL_GPI_ANCHOR_BIOSYNTHESIS | 25  | -0.32 | -1.03 | 0.434 | 0.5   | 1 | 8762 | tags=56%, list=35%, signal=86% |
| KEGG_CHRONIC_MYELOID_LEUKEMIA                             | 72  | -0.28 | -1.03 | 0.412 | 0.496 | 1 | 4544 | tags=31%, list=18%, signal=37% |
| KEGG_RETINOL_METABOLISM                                   | 62  | -0.25 | -1.02 | 0.433 | 0.505 | 1 | 5551 | tags=27%, list=22%, signal=35% |
| KEGG_LONG_TERM_POTENTIATION                               | 68  | -0.25 | -1.01 | 0.424 | 0.517 | 1 | 3061 | tags=21%, list=12%, signal=23% |
| KEGG_HISTIDINE_METABOLISM                                 | 27  | -0.29 | -1    | 0.443 | 0.531 | 1 | 2773 | tags=19%, list=11%, signal=21% |
| KEGG_STEROID_BIOSYNTHESIS                                 | 15  | -0.36 | -1    | 0.468 | 0.528 | 1 | 3281 | tags=33%, list=13%, signal=38% |
| KEGG_AXON_GUIDANCE                                        | 126 | -0.22 | -0.99 | 0.447 | 0.528 | 1 | 3737 | tags=21%, list=15%, signal=24% |
| KEGG_LYSOSOME                                             | 116 | -0.26 | -0.99 | 0.467 | 0.53  | 1 | 4845 | tags=28%, list=19%, signal=35% |
| KEGG_GLYCOSAMINOGLYCAN_BIOSYNTHESIS_CHONDROITIN_SULFATE   | 20  | -0.31 | -0.98 | 0.479 | 0.542 | 1 | 4987 | tags=35%, list=20%, signal=44% |
| KEGG_TYROSINE_METABOLISM                                  | 40  | -0.25 | -0.96 | 0.505 | 0.564 | 1 | 2226 | tags=15%, list=9%, signal=16%  |
| KEGG_MELANOMA                                             | 71  | -0.24 | -0.95 | 0.509 | 0.584 | 1 | 5219 | tags=27%, list=21%, signal=34% |
| KEGG_GLIOMA                                               | 63  | -0.25 | -0.93 | 0.558 | 0.605 | 1 | 4455 | tags=29%, list=18%, signal=35% |
| KEGG_GLYCOSAMINOGLYCAN_DEGRADATION                        | 21  | -0.32 | -0.92 | 0.535 | 0.621 | 1 | 2849 | tags=29%, list=11%, signal=32% |
| KEGG_TIGHT_JUNCTION                                       | 122 | -0.21 | -0.92 | 0.643 | 0.625 | 1 | 5352 | tags=26%, list=21%, signal=33% |
| KEGG_PROXIMAL_TUBULE_BICARBONATE_RECLAMATION              | 23  | -0.28 | -0.91 | 0.598 | 0.631 | 1 | 6091 | tags=35%, list=24%, signal=46% |
| KEGG_GAP_JUNCTION                                         | 83  | -0.22 | -0.91 | 0.641 | 0.63  | 1 | 3120 | tags=17%, list=12%, signal=19% |
| KEGG_ACUTE_MYELOID_LEUKEMIA                               | 56  | -0.25 | -0.9  | 0.58  | 0.638 | 1 | 5045 | tags=32%, list=20%, signal=40% |
| KEGG_BIOSYNTHESIS_OF_UNSATURATED_FATTY_ACIDS              | 19  | -0.3  | -0.9  | 0.589 | 0.638 | 1 | 5784 | tags=42%, list=23%, signal=55% |
| KEGG_CALCIIUM_SIGNALING_PATHWAY                           | 171 | -0.19 | -0.87 | 0.734 | 0.672 | 1 | 2954 | tags=13%, list=12%, signal=15% |
| KEGG_TGF_BETA_SIGNALING_PATHWAY                           | 84  | -0.21 | -0.85 | 0.71  | 0.705 | 1 | 3768 | tags=19%, list=15%, signal=22% |
| KEGG_CARDIAC_MUSCLE_CONTRACTION                           | 69  | -0.22 | -0.84 | 0.7   | 0.716 | 1 | 4136 | tags=19%, list=16%, signal=22% |
| KEGG_PHENYLALANINE_METABOLISM                             | 17  | -0.26 | -0.81 | 0.741 | 0.772 | 1 | 1768 | tags=18%, list=7%, signal=19%  |
| KEGG_ECM_RECEPTOR_INTERACTION                             | 82  | -0.2  | -0.81 | 0.827 | 0.765 | 1 | 7661 | tags=33%, list=30%, signal=47% |
| KEGG_ARRHYTHMOGENIC_RIGHT_VENTRICULAR_CARDIOMYOPATHY_ARVC | 74  | -0.19 | -0.8  | 0.839 | 0.769 | 1 | 4785 | tags=22%, list=19%, signal=27% |
| KEGG_DILATED_CARDIOMYOPATHY                               | 90  | -0.16 | -0.68 | 0.972 | 0.921 | 1 | 4136 | tags=14%, list=16%, signal=17% |
| KEGG_TASTE_TRANSDUCTION                                   | 48  | -0.17 | -0.62 | 0.973 | 0.955 | 1 | 8278 | tags=31%, list=33%, signal=47% |

# GSVA-CD3D

| ID                                | score     |
|-----------------------------------|-----------|
| OXIDATIVE_PHOSPHORYLATION         | 10.729157 |
| MYC_TARGETS_V1                    | 9.9610395 |
| DNA_REPAIR                        | 7.2864298 |
| IL6_JAK_STAT3_SIGNALING           | -7.011065 |
| MITOTIC_SPINDLE                   | -6.698179 |
| CHOLESTEROL_HOMEOSTASIS           | -6.505212 |
| REACTIVE_OXYGEN_SPECIES_PATHWAY   | -5.992948 |
| TNFA_SIGNALING_VIA_NFKB           | -5.782745 |
| WNT_BETA_CATENIN_SIGNALING        | -5.724965 |
| FATTY_ACID_METABOLISM             | 5.3808835 |
| MTORC1_SIGNALING                  | 5.3036425 |
| INFLAMMATORY_RESPONSE             | -5.223444 |
| ALLOGRAFT_REJECTION               | 5.045728  |
| ESTROGEN_RESPONSE_EARLY           | -4.976428 |
| EPITHELIAL_MESENCHYMAL_TRANSITION | -4.869214 |
| APICAL_JUNCTION                   | -4.356655 |
| APOPTOSIS                         | -4.317404 |
| XENOBIOTIC_METABOLISM             | -4.134617 |
| HYPOXIA                           | -4.064024 |
| UV_RESPONSE_DN                    | -3.934062 |
| NOTCH_SIGNALING                   | -3.752993 |
| BILE_ACID_METABOLISM              | 3.6151678 |
| APICAL_SURFACE                    | -3.548103 |
| COMPLEMENT                        | -3.297004 |
| ESTROGEN_RESPONSE_LATE            | -3.145306 |
| MYOGENESIS                        | -3.109212 |
| E2F_TARGETS                       | 2.9097862 |
| COAGULATION                       | -2.893737 |
| PEROXISOME                        | 2.8516404 |
| MYC_TARGETS_V2                    | 2.7905537 |
| ANGIOGENESIS                      | -2.482607 |
| PI3K_AKT_MTOR_SIGNALING           | -2.444168 |
| TGF_BETA_SIGNALING                | -2.393022 |
| HEME_METABOLISM                   | -2.070085 |
| KRAS_SIGNALING_DN                 | -1.872252 |
| GLYCOLYSIS                        | -1.844939 |
| INTERFERON_GAMMA_RESPONSE         | -1.746601 |
| PROTEIN_SECRETION                 | -1.345311 |
| IL2_STAT5_SIGNALING               | -1.162559 |
| G2M_CHECKPOINT                    | -1.130813 |
| HEDGEHOG_SIGNALING                | -1.121871 |
| ANDROGEN_RESPONSE                 | 0.9781321 |
| UNFOLDED_PROTEIN_RESPONSE         | 0.8889562 |
| PANCREAS_BETA_CELLS               | 0.8638894 |
| UV_RESPONSE_UP                    | 0.4170485 |
| INTERFERON_ALPHA_RESPONSE         | -0.402763 |
| ADIPOGENESIS                      | -0.364431 |
| P53_PATHWAY                       | 0.3564109 |
| KRAS_SIGNALING_UP                 | -0.133183 |
| SPERMATOGENESIS                   | 0.1223772 |

# GSVA-IL2RG

| ID                                | score     |
|-----------------------------------|-----------|
| ANDROGEN_RESPONSE                 | -5.746921 |
| PROTEIN_SECRETION                 | -5.560854 |
| E2F_TARGETS                       | -4.777298 |
| ANGIOGENESIS                      | 3.8666594 |
| COMPLEMENT                        | -3.634923 |
| MYC_TARGETS_V1                    | -3.492267 |
| CHOLESTEROL_HOMEOSTASIS           | 3.458809  |
| TGF_BETA_SIGNALING                | -3.398578 |
| HYPOXIA                           | 3.3914472 |
| MYOGENESIS                        | 3.1268813 |
| NOTCH_SIGNALING                   | 2.8698178 |
| XENOBIOTIC_METABOLISM             | 2.7760722 |
| MITOTIC_SPINDLE                   | 2.6842171 |
| APICAL_JUNCTION                   | 2.6803403 |
| INFLAMMATORY_RESPONSE             | 2.499167  |
| ADIPOGENESIS                      | -2.32427  |
| KRAS_SIGNALING_UP                 | -2.13646  |
| ESTROGEN_RESPONSE_EARLY           | 1.9426971 |
| MTORC1_SIGNALING                  | -1.901444 |
| PEROXISOME                        | -1.888238 |
| KRAS_SIGNALING_DN                 | 1.8273861 |
| WNT_BETA_CATENIN_SIGNALING        | 1.7783666 |
| UNFOLDED_PROTEIN_RESPONSE         | -1.630691 |
| INTERFERON_ALPHA_RESPONSE         | -1.609575 |
| G2M_CHECKPOINT                    | -1.563393 |
| OXIDATIVE_PHOSPHORYLATION         | -1.545585 |
| APOPTOSIS                         | -1.532684 |
| INTERFERON_GAMMA_RESPONSE         | -1.513934 |
| COAGULATION                       | 1.4476307 |
| TNFA_SIGNALING_VIA_NFKB           | 1.3618607 |
| P53_PATHWAY                       | 1.2750786 |
| IL2_STAT5_SIGNALING               | 1.2568505 |
| PI3K_AKT_MTOR_SIGNALING           | -1.17528  |
| UV_RESPONSE_DN                    | -1.127802 |
| DNA_REPAIR                        | -1.125822 |
| BILE_ACID_METABOLISM              | -1.061391 |
| ESTROGEN_RESPONSE_LATE            | -0.961842 |
| ALLOGRAFT_REJECTION               | -0.92997  |
| HEDGEHOG_SIGNALING                | -0.920573 |
| FATTY_ACID_METABOLISM             | -0.873371 |
| REACTIVE_OXYGEN_SPECIES_PATHWAY   | 0.8540427 |
| EPITHELIAL_MESENCHYMAL_TRANSITION | -0.835324 |
| GLYCOLYSIS                        | -0.833064 |
| SPERMATOGENESIS                   | 0.4522566 |
| HEME_METABOLISM                   | -0.432411 |
| MYC_TARGETS_V2                    | -0.385452 |
| IL6_JAK_STAT3_SIGNALING           | 0.3493695 |
| PANCREAS_BETA_CELLS               | 0.3223708 |
| UV_RESPONSE_UP                    | 0.2270148 |
| APICAL_SURFACE                    | 0.1649965 |

# GSVA-MS4A6A

| ID                                | score     |
|-----------------------------------|-----------|
| OXIDATIVE_PHOSPHORYLATION         | 8.1405348 |
| WNT_BETA_CATENIN_SIGNALING        | -6.134234 |
| CHOLESTEROL_HOMEOSTASIS           | -5.500869 |
| MITOTIC_SPINDLE                   | -5.205316 |
| APICAL_JUNCTION                   | -4.99393  |
| MYC_TARGETS_V1                    | 4.2330032 |
| HYPOXIA                           | -4.222799 |
| PROTEIN_SECRETION                 | 4.0196699 |
| UV_RESPONSE_DN                    | -3.992096 |
| TGF_BETA_SIGNALING                | -3.919795 |
| ESTROGEN_RESPONSE_LATE            | -3.835212 |
| EPITHELIAL_MESENCHYMAL_TRANSITION | -3.446536 |
| DNA_REPAIR                        | 3.1660424 |
| FATTY_ACID_METABOLISM             | 3.0238325 |
| G2M_CHECKPOINT                    | -2.760507 |
| APICAL_SURFACE                    | -2.588687 |
| APOPTOSIS                         | -2.417011 |
| ESTROGEN_RESPONSE_EARLY           | -2.181685 |
| GLYCOLYSIS                        | -1.96282  |
| IL6_JAK_STAT3_SIGNALING           | -1.95942  |
| ANGIOGENESIS                      | -1.934446 |
| PI3K_AKT_MTOR_SIGNALING           | 1.8773297 |
| KRAS_SIGNALING_DN                 | -1.729306 |
| INTERFERON_ALPHA_RESPONSE         | 1.6615808 |
| BILE_ACID_METABOLISM              | 1.638036  |
| ANDROGEN_RESPONSE                 | 1.532389  |
| MTORC1_SIGNALING                  | 1.5147741 |
| MYOGENESIS                        | -1.45048  |
| ALLOGRAFT_REJECTION               | 1.4314247 |
| REACTIVE_OXYGEN_SPECIES_PATHWAY   | -1.358352 |
| ADIPOGENESIS                      | 1.3562755 |
| PEROXISOME                        | 1.3476366 |
| MYC_TARGETS_V2                    | -1.337704 |
| UNFOLDED_PROTEIN_RESPONSE         | -1.298853 |
| XENOBIOTIC_METABOLISM             | -1.243449 |
| NOTCH_SIGNALING                   | -1.233895 |
| COAGULATION                       | -1.179689 |
| P53_PATHWAY                       | -0.962961 |
| HEDGEHOG_SIGNALING                | -0.866868 |
| PANCREAS_BETA_CELLS               | 0.8660526 |
| TNFA_SIGNALING_VIA_NFKB           | -0.85073  |
| KRAS_SIGNALING_UP                 | 0.6001211 |
| COMPLEMENT                        | -0.597655 |
| INFLAMMATORY_RESPONSE             | -0.568818 |
| INTERFERON_GAMMA_RESPONSE         | 0.5380981 |
| IL2_STAT5_SIGNALING               | 0.5220095 |
| SPERMATOGENESIS                   | -0.498684 |
| E2F_TARGETS                       | 0.4488889 |
| HEME_METABOLISM                   | 0.2950324 |
| UV_RESPONSE_UP                    | 0.1180031 |

# GSVA-NCF2

| ID                                | score     |
|-----------------------------------|-----------|
| KRAS_SIGNALING_UP                 | 5.9281006 |
| MYC_TARGETS_V1                    | -4.052554 |
| DNA_REPAIR                        | -4.020934 |
| MYC_TARGETS_V2                    | -3.976574 |
| FATTY_ACID_METABOLISM             | -3.854752 |
| UNFOLDED_PROTEIN_RESPONSE         | -3.796773 |
| IL6_JAK_STAT3_SIGNALING           | 3.7377007 |
| PANCREAS_BETA_CELLS               | 3.419959  |
| MTORC1_SIGNALING                  | -3.052616 |
| ESTROGEN_RESPONSE_EARLY           | 2.976356  |
| IL2_STAT5_SIGNALING               | -2.781477 |
| WNT_BETA_CATENIN_SIGNALING        | -2.769742 |
| PI3K_AKT_MTOR_SIGNALING           | 2.657473  |
| ALLOGRAFT_REJECTION               | -2.62422  |
| OXIDATIVE_PHOSPHORYLATION         | -2.599736 |
| MYOGENESIS                        | 2.4962542 |
| UV_RESPONSE_UP                    | 2.4816292 |
| HEME_METABOLISM                   | 2.3970595 |
| INTERFERON_GAMMA_RESPONSE         | -2.118948 |
| TGF_BETA_SIGNALING                | -2.084341 |
| P53_PATHWAY                       | -2.014871 |
| SPERMATOGENESIS                   | 1.9015166 |
| MITOTIC_SPINDLE                   | 1.8715471 |
| G2M_CHECKPOINT                    | 1.7410118 |
| ANGIOGENESIS                      | 1.7387014 |
| EPITHELIAL_MESENCHYMAL_TRANSITION | 1.6807595 |
| GLYCOLYSIS                        | -1.525884 |
| E2F_TARGETS                       | -1.449828 |
| ANDROGEN_RESPONSE                 | 1.3839716 |
| COAGULATION                       | 1.3040363 |
| PROTEIN_SECRETION                 | -1.173546 |
| TNFA_SIGNALING_VIA_NFKB           | 1.0634315 |
| BILE_ACID_METABOLISM              | 1.0560838 |
| ADIPOGENESIS                      | 1.0247184 |
| KRAS_SIGNALING_DN                 | 0.9708748 |
| HYPOXIA                           | 0.8500531 |
| PEROXISOME                        | -0.727493 |
| INTERFERON_ALPHA_RESPONSE         | -0.722237 |
| UV_RESPONSE_DN                    | -0.650538 |
| INFLAMMATORY_RESPONSE             | 0.6416738 |
| ESTROGEN_RESPONSE_LATE            | 0.5968317 |
| CHOLESTEROL_HOMEOSTASIS           | -0.556699 |
| REACTIVE_OXYGEN_SPECIES_PATHWAY   | 0.4868087 |
| HEDGEHOG_SIGNALING                | -0.377263 |
| COMPLEMENT                        | -0.311358 |
| APICAL_JUNCTION                   | -0.208431 |
| NOTCH_SIGNALING                   | 0.2040854 |
| APOPTOSIS                         | -0.093749 |
| XENOBIOTIC_METABOLISM             | -0.089589 |
| APICAL_SURFACE                    | -0.009074 |

# RT-qPCR data

| HC     |             |             |             |             |             |             |
|--------|-------------|-------------|-------------|-------------|-------------|-------------|
| CD3D   | 0.725965455 | 0.919392188 | 1.754916165 | 0.688611007 | 0.764114126 | 1.147001058 |
| IL2RG  | 1.118116755 | 0.647525945 | 0.804343657 | 1.325542681 | 1.088726055 | 1.015744908 |
| MS4A6A | 1.450720593 | 0.830719508 | 1.264648753 | 1.055692696 | 0.972239828 | 0.425978621 |
| NCF2   | 1.137822728 | 0.694804748 | 1.109670216 | 1.132654709 | 1.179470907 | 0.745576691 |
| MS     |             |             |             |             |             |             |
| CD3D   | 37.1164217  | 25.62948537 | 24.7427868  | 29.38283934 | 13.58903591 | 20.10210198 |
| IL2RG  | 1.262526084 | 1.010859179 | 0.979290318 | 0.735799903 | 0.695006128 | 0.41643248  |
| MS4A6A | 1.665251875 | 1.665444525 | 0.985259357 | 1.506629362 | 1.832760682 | 1.312935698 |
| NCF2   | 0.878405484 | 0.465688867 | 0.253303059 | 0.370396349 | 0.632345294 | 0.443007341 |
| NMO    |             |             |             |             |             |             |
| CD3D   | 0.387189162 | 0.717566878 | 0.651383341 | 0.357155421 |             |             |
| IL2RG  | 0.119526217 | 0.769362555 | 0.423732207 | 0.104327609 |             |             |
| MS4A6A | 0.240403186 | 1.293659373 | 1.054680348 | 0.199634887 |             |             |
| NCF2   | 0.054754284 | 0.745039182 | 1.163161325 | 0.114231056 |             |             |



# code1

```
# load R packages
library(glmnet)
library(survival)
library(pheatmap)
library(gplots)
library(survcomp)
library(survivalROC)
library(pROC)
library(ggplot2)
# customized function
display.progress = function (index, totalN, breakN=20) {

  if ( index %% ceiling(totalN/breakN) ==0 ) {
    cat(paste(round(index*100/totalN), "% ", sep=""))
  }

}

# set colors
jco <- c("#2874C5", "#EABF00", "#868686", "#C6524A", "#80A7DE")

tpms <- read.table("ARGexp.txt", sep = "\t", row.names = 1, check.names = F, stringsAsFactors =
F, header = T)
tpms[is.na(tpms)] <- 0
colnames(tpms) <- gsub("-", "_", colnames(tpms))
tum.sam <- rownames(tpms)

geo1.tpms <- read.csv("1.txt", sep = "\t", row.names = 1, check.names = F, stringsAsFactors =
F, header = T)
geo1.tpms=log2(geo1.tpms+1)
geo1.tpms[is.na(geo1.tpms)] <- 0
colnames(geo1.tpms) <- gsub("-", "_", colnames(geo1.tpms))

comgene <- intersect(colnames(tpms), colnames(geo1.tpms))
length(comgene)
tpms <- tpms[,comgene]
geo1.tpms <- geo1.tpms[,comgene]

outTab <- NULL
for (seed in 1:100) {
  #seed = 6 # please set this after referring to outTab.txt

  risk <- NULL
```

```

set.seed(seed = seed)
tmp <- tpms[tum.sam,]
colnames(tmp) <- make.names(colnames(tmp))
#-----#
#                                     #
cvfit = cv.glmnet(scale(as.matrix(tmp[,-1])),
                 tmp$Tissue,
                 family = "gaussian",
                 alpha = 1,
                 nfold = 10) #
myCoefs <- coef(cvfit, s='lambda.min');
fea <- rownames(coef(cvfit, s = 'lambda.min'))[coef(cvfit, s = 'lambda.min')[,1]!= 0]

lasso_fea <- fea
lasso_coef <- myCoefs@x; names(lasso_coef) <- lasso_fea

lasso_coef.hr <- data.frame(gene = names(lasso_coef),
                          coef = lasso_coef,
                          stringsAsFactors = F)

lasso_coef.hr <- lasso_coef.hr[intersect(comgene,names(lasso_coef)),]
lasso_coef.hr <- lasso_coef.hr[order(lasso_coef.hr$coef,decreasing = F),]
#-----#

if(nrow(lasso_coef.hr) > 1) {
  # risk score in training
  tmp <- scale(as.matrix(tpms[tum.sam,rownames(lasso_coef.hr)]))
  risk.score <- apply(tmp,1,function(x) {x %*% lasso_coef.hr$coef})
  risk.score.train <- risk.score

  tmp <- tpms[names(risk.score),1:2]

  tmp$risk.score <- as.numeric(risk.score)
  tmp$RiskGroup <- ifelse(tmp$risk.score > median(risk.score) ,"HRisk","LRisk")
  risk <- rbind.data.frame(risk,
                          data.frame(samID = tum.sam,
                                      riskscore = tmp$risk.score,
                                      riskgroup = tmp$RiskGroup,
                                      cohort = "GEO training",
                                      stringsAsFactors = F),
                          stringsAsFactors = F)

  fit <- glm(Tissue ~ risk.score, data=tmp, family = "gaussian")

```

```

predicted <- predict(fit, tmp, type = "response")
rocobj <- roc(tmp$Tissue,tmp$risk.score)
auc <- round(auc(tmp$Tissue,tmp$risk.score), 4)

## risk score in validate
tmp.validate <- scale(as.matrix(geo1.tpms[,rownames(lasso_coef.hr)]))
risk.score <- apply(tmp.validate,1,function(x) {x %*% lasso_coef.hr$coef})
risk.score.validate <- risk.score

tmp.validate <- geo1.tpms[names(risk.score),1:2]
tmp.validate$risk.score <- as.numeric(risk.score)
tmp.validate$RiskGroup <- ifelse(tmp.validate$risk.score >
median(risk.score) ,"HRisk","LRisk")
risk <- rbind.data.frame(risk,
                        data.frame(samID = rownames(geo1.tpms),
                                   riskscore = tmp.validate$risk.score,
                                   riskgroup = tmp.validate$RiskGroup,
                                   cohort = "GEO test",
                                   stringsAsFactors = F),
                        stringsAsFactors = F)

predicted.test <- predict(fit, tmp.validate, type = "response")
rocobj.test <- roc(tmp.validate$Tissue,tmp.validate$risk.score)
auc.test <- round(auc(tmp.validate$Tissue,tmp.validate$risk.score), 4)

if(auc > 0.1 & auc.test > 0.1) {
  cat(paste0("seed=",seed,"; auc.train=",auc,"; auc.test=",auc.test,"\n"))
  cat("\n")
  outTab <- rbind.data.frame(outTab,data.frame(seed=seed,

modelgene.num=nrow(lasso_coef.hr),

                                auc.rain=auc,
                                auc.test=auc.test,

modelgene=paste(gsub("-", "_",rownames(lasso_coef.hr)),collapse = ","),

                                stringsAsFactors = F),
                                stringsAsFactors = F)

### plot(rocobj)

```

```

p1 <- ggroc(rocobj,color = "red",linetype = 1, size = 1, alpha =1,legacy.axes = T) +
  geom_abline(intercept=0,slope=1,color="grey",size=1,linetype=1) +
  labs(x="Specificity",
       y="Sensitivity",
       title = "GEO train") +
  annotate("text",x=.8,y=.1,label=paste0("AUC = ",auc),
         size =5,family="serif") +
  coord_cartesian(xlim=c(0,1),ylim=c(0,1)) +
  theme_bw() +
  theme(panel.background = element_rect(fill='transparent'),
        axis.ticks.length = unit(0.4,"lines"),
        axis.ticks = element_line(color='black'),
        axis.line = element_line(size=.5, colour='black'),
        axis.title = element_text(colour='black',size=12,face="bold"),
        axis.text = element_text(colour='black',size=10,face="bold"),
        text = element_text(colour='black',size=8,family="serif"))
p2 <- ggroc(rocobj.test,color = "red",linetype = 1, size = 1, alpha =1,legacy.axes = T) +
  geom_abline(intercept=0,slope=1,color="grey",size=1,linetype=1) +
  labs(x="Specificity",
       y="Sensitivity",
       title = "GEO test") +
  annotate("text",x=.8,y=.1,label=paste0("AUC = ",auc.test),
         size =5,family="serif") +
  coord_cartesian(xlim=c(0,1),ylim=c(0,1)) +
  theme_bw() +
  theme(panel.background = element_rect(fill='transparent'),
        axis.ticks.length = unit(0.4,"lines"),
        axis.ticks = element_line(color='black'),
        axis.line = element_line(size=.5, colour='black'),
        axis.title = element_text(colour='black',size=12,face="bold"),
        axis.text = element_text(colour='black',size=10,face="bold"),
        text = element_text(colour='black',size=8,family="serif"))
pdf(file = paste0("survivalROC for training dataset",seed,".pdf"),width = 4,height = 4)
print(p1)
dev.off()
pdf(file = paste0("survivalROC for validation dataset",seed,".pdf"),width = 4,height = 4)
print(p2)
dev.off()
}
}
write.table(outTab,paste0("outTab",seed,".txt"),sep = "\t",row.names = F,quote = F)
}
write.table(outTab,"outTab.txt",sep = "\t",row.names = F,quote = F)
write.table(risk,"risk.txt",sep = "\t",row.names = F,quote = F)

```

```

darkred <- "#F2042C"
darkblue <- "#21498D"

cutoff <- 0.1
lasso_coef.hr$gene <- gsub("_","-",lasso_coef.hr$gene)
lasso_coef.hr$group <- as.character(cut(lasso_coef.hr$coef, breaks = c(-Inf, -cutoff, cutoff,
Inf),labels = c("#21498D","#EABF00","#21498D")))
pdf("lasso_coef_hr.pdf",width = 5,height = 2.5)
par(bty="n", mgp = c(1.7,.33,0),mar=c(2.5,2.7,1,1)+.1, las=1, tcl=-.25,xpd = T)
a <- barplot(lasso_coef.hr$coef,col = lasso_coef.hr$group,border = NA,
             horiz = T,xlim = c(-1,1),add=F,xaxt = "n")
axis(side = 1, at = c(-1,-0.8,-0.6,-0.4,-0.2,0,0.2,0.4,0.6,0.8,1),
     labels = c("-1","-.8","-.6","-.4","-.2","0",".2",".4",".6",".8","1"))
for (i in 1:nrow(lasso_coef.hr)) {
  text(y = a[,1][i],x = ifelse(lasso_coef.hr$coef[i] > 0,-0.0001,0.0001),pos =
ifelse(lasso_coef.hr$coef[i] > 0,2,4),labels = lasso_coef.hr$gene[i],adj =
ifelse(lasso_coef.hr$coef[i]>0,0,1))
}
###points(0.6,2,pch = 15, cex = 1.5)
points(0.6,1,pch = 19, cex = 1.5)
###text(0.6,2,"log2(HR)",pos = 4)
text(0.6,1,"Coefficient",pos = 4)
invisible(dev.off())
write.table(lasso_coef.hr[,1:2], "lasso coefficient.txt",sep = "\t",row.names = F,col.names =
T,quote = F)

# 2. lasso details
pdf("lasso.pdf",width = 4.5,height = 4)
par(bty="o", mgp = c(1.9,.33,0), mar=c(4.1,4.1,2.1,2.1)+.1, las=1, tcl=-.25,xpd = F)
plot(cvfit$glmnet.fit, "lambda", label=F)
abline(v=log(cvfit$lambda.min),lwd=2,col="grey60",lty=4)
invisible(dev.off())

pdf("cvfit.pdf",width = 4.5,height = 4)
par(bty="o", mgp = c(1.9,.33,0), mar=c(4.1,4.1,2.1,2.1)+.1, las=1, tcl=-.25)
plot(cvfit)
abline(h=min(cvfit$cvm),lwd=2,col="black",lty=4)
points(log(cvfit$lambda.min),min(cvfit$cvm),pch=18,cex=2,col="black")
points(log(cvfit$lambda.min),min(cvfit$cvm),pch=18,cex=1.5,col="#008B8A")
invisible(dev.off())

save.image("Heng.RData")

```

## 苏州大学附属第一医院医学伦理委员会伦理审查批件

批件号：(2023) 伦审批第 117 号

|                                                                                                                                                                                                                                                                                                                                                                                                                                                                                                                                        |                                                                                     |                        |            |
|----------------------------------------------------------------------------------------------------------------------------------------------------------------------------------------------------------------------------------------------------------------------------------------------------------------------------------------------------------------------------------------------------------------------------------------------------------------------------------------------------------------------------------------|-------------------------------------------------------------------------------------|------------------------|------------|
| 项目名称                                                                                                                                                                                                                                                                                                                                                                                                                                                                                                                                   | 中枢神经系统自身免疫性疾病多中心注册登记研究                                                              |                        |            |
| 研究类别                                                                                                                                                                                                                                                                                                                                                                                                                                                                                                                                   | 临床科研项目                                                                              |                        |            |
| 申办方/发起方                                                                                                                                                                                                                                                                                                                                                                                                                                                                                                                                | 首都医科大学宣武医院                                                                          |                        |            |
| 主要研究者                                                                                                                                                                                                                                                                                                                                                                                                                                                                                                                                  | 薛群                                                                                  | 承担科室                   | 神经内科       |
| 伦理受理号                                                                                                                                                                                                                                                                                                                                                                                                                                                                                                                                  | 2023117                                                                             | 受理时间                   | 2023-04-25 |
| 审查时间                                                                                                                                                                                                                                                                                                                                                                                                                                                                                                                                   | 2023-04-30                                                                          | 审查类别                   | 初始审查       |
| 审查委员                                                                                                                                                                                                                                                                                                                                                                                                                                                                                                                                   | 王进红, 朱志伟                                                                            | 审查方式                   | 快速审查       |
| 审查意见                                                                                                                                                                                                                                                                                                                                                                                                                                                                                                                                   | 依据我国相关法律、法规和国际伦理准则, 伦理委员会对本项研究的研究方案、知情同意书、受试者招募材料及其他有关内容进行了快速审查, 审查结果为同意开展本项研究。     |                        |            |
| 跟踪审查频率                                                                                                                                                                                                                                                                                                                                                                                                                                                                                                                                 | 本研究项目批准后 <u>每 12 个月</u> 向本伦理委员会递交研究进展报告。                                            |                        |            |
| 主任委员 (签名):                                                                                                                                                                                                                                                                                                                                                                                                                                                                                                                             |  | 苏州大学附属第一医院医学伦理委员会 (盖章) |            |
|                                                                                                                                                                                                                                                                                                                                                                                                                                                                                                                                        |                                                                                     | 日期: 2023 年 05 月 04 日   |            |
| <p><b>研究者/申办方须知:</b></p> <ol style="list-style-type: none"> <li>1. 请遵循 CFDA/GCP 和《赫尔辛基宣言》的原则、遵循伦理委员会批准的方案开展研究, 保护受试者的健康和权利。研究者应严格按照所批准方案规定的期限和受试者例数完成研究, 不得随意更改。</li> <li>2. 对已批准的临床研究方案、知情同意书等材料的任何修改及主要研究者更换等, 须再次提交伦理委员会重新审查, 获得批准后方可执行。</li> <li>3. 暂停/提前终止临床研究, 请及时向伦理委员会报告。</li> <li>4. 研究过程中发生需要上报的安全性事件, 请按照要求向伦理委员会报告。</li> <li>5. 发生违背方案的情况须及时向本伦理委员会报告。</li> <li>6. 根据伦理委员会批件中规定的年度/定期跟踪审查频率, 无论试验开始与否, 请在持续审查日到期前 1 个月提出持续审查的申请并递交研究进展报告。</li> <li>7. 完成临床研究, 须及时提交结题报告供伦理委员会审查。</li> <li>8. 本批件有效期一年 (自批准之日起)。</li> </ol> |                                                                                     |                        |            |

审查文件清单

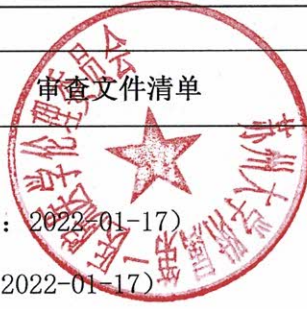

1. 临床研究方案（版本号：3.0，日期：2022-01-17）
2. 知情同意书（版本号：3.0，日期：2022-01-17）
3. 组长单位伦理审查批件（批件号：临研审[2021]017号-修正2）
4. 主要研究者简历
5. 研究者声明
6. 研究团队分工明细表
7. 涉及人的遗传资源使用管理声明（日期：2023-04-08）

# Supplementary Methods

## Single-cell analysis

After reading in the single cell data, the PercentageFeatureSet function of the Seurat package was used to calculate the mitochondrial content of the cells. Low quality cells were filtered based on the threshold  $nFeature_{RNA} > 50$  &  $percent.mt < 10$ . The data was then normalized using the NormalizeData function, and then the genes with the highest variance changes were obtained by the FindVariableFeatures function. The single cell data was downscaled using PCA, and the optimal PC number was observed to be 11, and t-SNE clustered cell subpopulations by ElbowPlot. The cellular subgroups were annotated using the SingleR package. Marker genes for each cell subtype were calculated using the FindAllMarkers function with min.pct set to 0.25.

## Ligand-receptor interaction analysis (CellChat)

Use the createCellChat function to construct the cellchat object, with species selection CellChatDB.human. then preprocess the data. Use identifyOverExpressedGenes function to identify overexpressed genes and identifyOverExpressedInteractions function to identify overexpressed ligand-receptor pairs. The cellular communication network was then inferred using the computeCommunProb function to calculate the probability of cellular interactions. The communication results of all ligand-receptor interactions for each signaling pathway were calculated using computeCommunProbPathway. Use aggregateNet to calculate cell communication results for integration between cell types and count the number of times each cell communicates.

## Predictive model construction



The lasso model was constructed using the `cv.glmnet` function with `family = "gaussian"`, `alpha = 1`, `nfold = 10` to find the minimum lambda value of 0.0001682887. As  $\lambda$  decreases, the compression parameter decreases, and the absolute value of the coefficients increase. The `coef` function was then used to calculate the coefficients for each lasso gene. When the lambda value reaches the minimum, the combination of genes is 4, suggesting 4 genes to construct the model with minimum error. According to the expression of the 4 genes \* lasso coefficient to get the model score, using the `predict` function to construct the training set and validation set model respectively, the AUC of the training set and validation set are above 0.7, suggesting that the model is more stable.

#### **GSEA analysis (Gene set enrichment analysis) and GSVA analysis (gene set variance analysis)**

The KEGG pathways involved in the key genes were analyzed using GSEA software (JAVA version). First, we constructed a sample matrix, divided the patients into high and low expression groups according to the median value of key gene expression, uploaded the matrix, selected C2 CP KEGG for the background set, set the number of permutations to 1000, set the phenotype labels to the samples of the high and low expression groups, and set the others to the defaults, and analyzed KEGG pathways involved in the key genes. pathway.GSVA analysis was performed to quantify the level of hallmark pathway by GSVA package, and then divided into high and low expression groups according to the median value of key gene expression respectively to see the difference of pathway level in the two groups of patients.
